# Supplementary material
Source: publisher figshare collection journal article supplement (https://acs.figshare.com/ndownloader/files/8454107)
Supplement: Supplementary file 1 [file 8454107]

## Sheet: Sheet1
	Supporting information to:
	Non-targeted identification of reactive metabolite protein adducts
	Michael G. Leeming,(1) William A. Donald,(2) Richard A.J. O’Hair(1)
	(1) School of Chemistry and Bio21 Institute of Molecular Science and Biotechnology, University of Melbourne, Victoria 3010, Australia.
	(2) School of Chemistry, University of New South Wales, Sydney, NSW 2052, Australia.
	Table S1: Proteins identified by database searching in APAP treatment and control samples
	Proteins identified in APAP treatment 1
			Number of
	Accension	Mass (Da)	Significant Sequences	Description
	CPSM_RAT	164476	64	RecName: Full=Carbamoyl-phosphate synthase [ammonia]
	G3V6P7_RAT	226273	52	SubName: Full=Myosin, heavy polypeptide 9
	GRP78_RAT	72302	33	RecName: Full=78 kDa glucose-regulated protein; Short=GRP-78; AltName: Full=Heat shock 70 kDa protein 5; AltName: Full=Immunoglobulin heavy chain-binding protein; Short=BiP; AltName: Full=Steroidogenesis-activator polypeptide; Flags: Precursor OS=Ra
	CLH1_RAT	191477	34	RecName: Full=Clathrin heavy chain 1 OS=Rattus norvegicus (Rat)
	ATPB_RAT	56318	24	RecName: Full=ATP synthase subunit beta
	ACSL1_RAT	78128	32	RecName: Full=Long-chain-fatty-acid--CoA ligase 1; EC=6.2.1.3; AltName: Full=Long-chain acyl-CoA synthetase 1; Short=LACS 1; AltName: Full=Long-chain-fatty-acid--CoA ligase
	CP2CB_RAT	57144	24	RecName: Full=Cytochrome P450 2C11; EC=1.14.14.1; AltName: Full=CYPIIC11; AltName: Full=Cytochrome P-450(M-1); AltName: Full=Cytochrome P450-UT-2; AltName: Full=Cytochrome P450-UT-A; AltName: Full=Cytochrome P450H OS=Rattus norvegicus (Rat)
	Q7TMC7_RAT	107343	32	SubName: Full=Ab2-417 {ECO:0000313|EMBL:AAP92615.1}; SubName: Full=Cc1-8 {ECO:0000313|EMBL:AAP92642.1}; SubName: Full=Signal recognition particle receptor subunit beta {ECO:0000313|Ensembl:ENSRNOP00000012725} OS=Rattus norvegicus (Rat)
	D4A1W8_RAT	99125	23	SubName: Full=Microsomal triglyceride transfer protein {ECO:0000313|EMBL:EDL82305.1}; SubName: Full=Protein Mttp {ECO:0000313|Ensembl:ENSRNOP00000014630} OS=Rattus norvegicus (Rat)
	A0A0A0MY09_RAT	92842	29	SubName: Full=Endoplasmin {ECO:0000313|Ensembl:ENSRNOP00000034846} OS=Rattus norvegicus (Rat)
	ALBU_RAT	68686	27	RecName: Full=Serum albumin; Flags: Precursor OS=Rattus norvegicus (Rat)
	EST4_RAT	62269	17	RecName: Full=Liver carboxylesterase 4; EC=3.1.1.1; AltName: Full=Carboxyesterase ES-4; AltName: Full=Kidney microsomal carboxylesterase; AltName: Full=Microsomal palmitoyl-CoA hydrolase; Flags: Precursor OS=Rattus norvegicus (Rat)
	TRFE_RAT	76346	27	RecName: Full=Serotransferrin; Short=Transferrin; AltName: Full=Beta-1 metal-binding globulin; AltName: Full=Liver regeneration-related protein LRRG03; AltName: Full=Siderophilin; Flags: Precursor OS=Rattus norvegicus (Rat)
	HYEP_RAT	52548	26	RecName: Full=Epoxide hydrolase 1; EC=3.3.2.9; AltName: Full=Epoxide hydratase; AltName: Full=Microsomal epoxide hydrolase OS=Rattus norvegicus (Rat)
	CP2D1_RAT	57139	19	RecName: Full=Cytochrome P450 2D1; EC=1.14.14.1; AltName: Full=CYPIID1; AltName: Full=Cytochrome P450-CMF1A; AltName: Full=Cytochrome P450-DB1; AltName: Full=Cytochrome P450-UT-7; AltName: Full=Debrisoquine 4-hydroxylase OS=Rattus norvegicus (Rat)
	RPN2_RAT	69035	20	RecName: Full=Dolichyl-diphosphooligosaccharide--protein glycosyltransferase subunit 2; EC=2.4.99.18; AltName: Full=Dolichyl-diphosphooligosaccharide--protein glycosyltransferase 63 kDa subunit; AltName: Full=Ribophorin II; Short=RPN-II; AltName: Fu
	D4ABM1_RAT	56153	19	SubName: Full=Cytochrome P450 2C7 {ECO:0000313|Ensembl:ENSRNOP00000045029} OS=Rattus norvegicus (Rat)
	CP2DQ_RAT	56648	23	RecName: Full=Cytochrome P450 2D26; EC=1.14.14.1; AltName: Full=CYPIID26; AltName: Full=Cytochrome P450-CMF2; AltName: Full=Cytochrome P450-DB2; AltName: Full=Debrisoquine 4-hydroxylase OS=Rattus norvegicus (Rat)
	SDHA_RAT	71570	19	RecName: Full=Succinate dehydrogenase [ubiquinone] flavoprotein subunit
	PDIA1_RAT	56916	20	RecName: Full=Protein disulfide-isomerase; Short=PDI; EC=5.3.4.1; AltName: Full=Cellular thyroid hormone-binding protein; AltName: Full=Prolyl 4-hydroxylase subunit beta; Flags: Precursor OS=Rattus norvegicus (Rat)
	PDIA6_RAT	48143	17	RecName: Full=Protein disulfide-isomerase A6; EC=5.3.4.1; AltName: Full=Calcium-binding protein 1; Short=CaBP1; AltName: Full=Protein disulfide isomerase P5; AltName: Full=Thioredoxin domain-containing protein 7; Flags: Precursor OS=Rattus norvegicu
	DHE3_RAT	61377	21	RecName: Full=Glutamate dehydrogenase 1
	ATPA_RAT	59717	18	RecName: Full=ATP synthase subunit alpha
	PDIA3_RAT	56588	24	RecName: Full=Protein disulfide-isomerase A3; EC=5.3.4.1; AltName: Full=58 kDa glucose-regulated protein; AltName: Full=58 kDa microsomal protein; Short=p58; AltName: Full=Disulfide isomerase ER-60; AltName: Full=Endoplasmic reticulum resident prote
	Q6P136_RAT	111151	26	SubName: Full=Hyou1 protein {ECO:0000313|EMBL:AAH65310.1}; SubName: Full=Hypoxia up-regulated 1
	Q5EB99_RAT	56048	19	SubName: Full=Cytochrome P450-like {ECO:0000313|EMBL:AAH89886.1} OS=Rattus norvegicus (Rat)
	ACTG_RAT	41766	15	RecName: Full=Actin
	CATA_RAT	59719	21	RecName: Full=Catalase; EC=1.11.1.6 OS=Rattus norvegicus (Rat)
	F1LZW6_RAT	74336	29	SubName: Full=Protein Slc25a13 {ECO:0000313|Ensembl:ENSRNOP00000013816}; Flags: Fragment OS=Rattus norvegicus (Rat)
	M0RBF1_RAT	186206	31	SubName: Full=Complement C3 {ECO:0000313|Ensembl:ENSRNOP00000066885}; SubName: Full=RCG45082 {ECO:0000313|EMBL:EDL83571.1} OS=Rattus norvegicus (Rat)
	CP2C6_RAT	55967	18	RecName: Full=Cytochrome P450 2C6; EC=1.14.14.1; AltName: Full=CYPIIC6; AltName: Full=Cytochrome P450 PB1; AltName: Full=PTF2 OS=Rattus norvegicus (Rat)
	FMO1_RAT	59787	15	RecName: Full=Dimethylaniline monooxygenase [N-oxide-forming] 1; EC=1.14.13.8; AltName: Full=Dimethylaniline oxidase 1; AltName: Full=Hepatic flavin-containing monooxygenase 1; Short=FMO 1 OS=Rattus norvegicus (Rat)
	TBA1C_RAT	49905	14	RecName: Full=Tubulin alpha-1C chain; AltName: Full=Alpha-tubulin 6; AltName: Full=Tubulin alpha-6 chain OS=Rattus norvegicus (Rat)
	PYC_RAT	129695	22	RecName: Full=Pyruvate carboxylase
	TBA4A_RAT	49892	12	RecName: Full=Tubulin alpha-4A chain; AltName: Full=Alpha-tubulin 4; AltName: Full=Tubulin alpha-4 chain OS=Rattus norvegicus (Rat)
	TERA_RAT	89293	22	RecName: Full=Transitional endoplasmic reticulum ATPase; Short=TER ATPase; EC=3.6.4.6; AltName: Full=15S Mg(2+)-ATPase p97 subunit; AltName: Full=Valosin-containing protein; Short=VCP OS=Rattus norvegicus (Rat)
	Q6P7A7_RAT	68359	20	RecName: Full=Dolichyl-diphosphooligosaccharide--protein glycosyltransferase subunit 1 {ECO:0000256|RuleBase:RU361143}; EC=2.4.99.18 {ECO:0000256|RuleBase:RU361143} OS=Rattus norvegicus (Rat)
	EST5_RAT	62455	14	RecName: Full=Liver carboxylesterase B-1; EC=3.1.1.1; AltName: Full=Liver microsomal carboxylesterase; Flags: Precursor OS=Rattus norvegicus (Rat)
	G3V6T7_RAT	72703	23	RecName: Full=Protein disulfide-isomerase A4 {ECO:0000256|PIRNR:PIRNR036862}; AltName: Full=Endoplasmic reticulum resident protein 72 {ECO:0000256|PIRNR:PIRNR036862} OS=Rattus norvegicus (Rat)
	D3ZAN3_RAT	90515	18	SubName: Full=Alpha glucosidase 2 alpha neutral subunit (Predicted) {ECO:0000313|EMBL:EDM12754.1}; SubName: Full=Protein Ganab {ECO:0000313|Ensembl:ENSRNOP00000036123} OS=Rattus norvegicus (Rat)
	Q5I0P5_RAT	55804	17	SubName: Full=Cytochrome P450 2C13
	GSTM2_RAT	25686	17	RecName: Full=Glutathione S-transferase Mu 2; EC=2.5.1.18; AltName: Full=GST 4-4; AltName: Full=GSTM2-2; AltName: Full=Glutathione S-transferase Yb-2; Short=GST Yb2 OS=Rattus norvegicus (Rat)
	CP2CD_RAT	55824	17	RecName: Full=Cytochrome P450 2C13
	BHMT1_RAT	44948	14	RecName: Full=Betaine--homocysteine S-methyltransferase 1; EC=2.1.1.5 OS=Rattus norvegicus (Rat)
	A1M_RAT	167019	30	RecName: Full=Alpha-1-macroglobulin; Short=Alpha-1-M; AltName: Full=Alpha-1-macroglobulin 165 kDa subunit; Contains: RecName: Full=Alpha-1-macroglobulin 45 kDa subunit; Flags: Precursor OS=Rattus norvegicus (Rat)
	G3V928_RAT	504558	20	SubName: Full=Protein Lrp1 {ECO:0000313|Ensembl:ENSRNOP00000034210}; SubName: Full=RCG59548 {ECO:0000313|EMBL:EDM16460.1} OS=Rattus norvegicus (Rat)
	CP2D3_RAT	56605	19	RecName: Full=Cytochrome P450 2D3; EC=1.14.14.1; AltName: Full=CYPIID3; AltName: Full=Cytochrome P450-DB3; AltName: Full=Debrisoquine 4-hydroxylase OS=Rattus norvegicus (Rat)
	GBLP_RAT	35055	12	RecName: Full=Guanine nucleotide-binding protein subunit beta-2-like 1; AltName: Full=Receptor for activated C kinase; AltName: Full=Receptor of activated protein kinase C 1; Short=RACK1; Contains: RecName: Full=Guanine nucleotide-binding protein su
	CES1D_RAT	62108	17	RecName: Full=Carboxylesterase 1D; AltName: Full=Carboxyesterase ES-10; AltName: Full=Carboxylesterase 3; EC=3.1.1.1; EC=3.1.1.67; AltName: Full=ES-HVEL; AltName: Full=Fatty acid ethyl ester synthase; Short=FAEE synthase; AltName: Full=Liver carboxy
	VDAC1_RAT	30737	13	RecName: Full=Voltage-dependent anion-selective channel protein 1; Short=VDAC-1; Short=rVDAC1; AltName: Full=Outer mitochondrial membrane protein porin 1 OS=Rattus norvegicus (Rat)
	NCPR_RAT	76914	18	RecName: Full=NADPH--cytochrome P450 reductase; Short=CPR; Short=P450R; EC=1.6.2.4 OS=Rattus norvegicus (Rat)
	ASSY_RAT	46467	18	RecName: Full=Argininosuccinate synthase; EC=6.3.4.5; AltName: Full=Citrulline--aspartate ligase OS=Rattus norvegicus (Rat)
	UDB15_RAT	61020	17	RecName: Full=UDP-glucuronosyltransferase 2B15; Short=UDPGT 2B15; EC=2.4.1.17; AltName: Full=UDP-glucuronosyltransferase 2B36; Short=UDPGT 2B36; Flags: Precursor OS=Rattus norvegicus (Rat)
	A1XF83_RAT	60946	17	SubName: Full=UDP glycosyltransferase 2 family polypeptide B {ECO:0000313|EMBL:ABC71921.1} OS=Rattus norvegicus (Rat)
	HSP7C_RAT	70827	16	RecName: Full=Heat shock cognate 71 kDa protein; AltName: Full=Heat shock 70 kDa protein 8 OS=Rattus norvegicus (Rat)
	CP2DA_RAT	57039	16	RecName: Full=Cytochrome P450 2D10; EC=1.14.14.1; AltName: Full=CYPIID10; AltName: Full=Cytochrome P450-CMF1B; AltName: Full=Cytochrome P450-DB5; AltName: Full=Debrisoquine 4-hydroxylase OS=Rattus norvegicus (Rat)
	Q68G19_RAT	60987	17	SubName: Full=RCG57123 {ECO:0000313|EMBL:EDL89823.1}; SubName: Full=UDP glucuronosyltransferase 2 family
	ALDOB_RAT	39593	12	RecName: Full=Fructose-bisphosphate aldolase B; EC=4.1.2.13; AltName: Full=Liver-type aldolase OS=Rattus norvegicus (Rat)
	F1LM22_RAT	60956	17	SubName: Full=UDP-glucuronosyltransferase 2B2 {ECO:0000313|Ensembl:ENSRNOP00000043239} OS=Rattus norvegicus (Rat)
	ADH1_RAT	39620	14	RecName: Full=Alcohol dehydrogenase 1; EC=1.1.1.1; AltName: Full=Alcohol dehydrogenase A subunit OS=Rattus norvegicus (Rat)
	RDH3_RAT	35639	17	RecName: Full=Retinol dehydrogenase 3; EC=1.1.1.105; AltName: Full=Retinol dehydrogenase type I; Short=RODH I OS=Rattus norvegicus (Rat)
	UD2B1_RAT	60445	15	RecName: Full=UDP-glucuronosyltransferase 2B1; Short=UDPGT 2B1; EC=2.4.1.17; AltName: Full=UDPGTr-2; Flags: Precursor OS=Rattus norvegicus (Rat)
	MGST1_RAT	17460	8	RecName: Full=Microsomal glutathione S-transferase 1; Short=Microsomal GST-1; EC=2.5.1.18; AltName: Full=Microsomal GST-I OS=Rattus norvegicus (Rat)
	H17B6_RAT	36122	13	RecName: Full=17-beta-hydroxysteroid dehydrogenase type 6; Short=17-beta-HSD 6; Short=17-beta-HSD6; EC=1.1.1.105; EC=1.1.1.239; EC=1.1.1.62; AltName: Full=3-alpha->beta-hydroxysteroid epimerase; Short=3-alpha->beta-HSE; AltName: Full=Oxidative 3-alp
	Q6P6V2_RAT	35629	14	SubName: Full=Rdh2 protein {ECO:0000313|EMBL:AAH62000.1} OS=Rattus norvegicus (Rat)
	Q6IN15_RAT	76324	17	SubName: Full=Acyl-CoA synthetase long-chain family member 5 {ECO:0000313|EMBL:AAH72497.1}; SubName: Full=Acyl-CoA synthetase long-chain family member 5
	ECHA_RAT	82613	17	RecName: Full=Trifunctional enzyme subunit alpha
	A1I3_RAT	163670	20	RecName: Full=Alpha-1-inhibitor 3; AltName: Full=Alpha-1-inhibitor 3 variant II; Short=Alpha-1-inhibitor III; Flags: Precursor OS=Rattus norvegicus (Rat)
	CP2D4_RAT	56661	13	RecName: Full=Cytochrome P450 2D4; EC=1.14.14.1; AltName: Full=CYPIID4; AltName: Full=Cytochrome P450-CMF3; AltName: Full=Cytochrome P450-DB4; AltName: Full=Debrisoquine 4-hydroxylase OS=Rattus norvegicus (Rat)
	ALDH2_RAT	56453	19	RecName: Full=Aldehyde dehydrogenase
	ETFD_RAT	68155	19	RecName: Full=Electron transfer flavoprotein-ubiquinone oxidoreductase
	F1LLV6_RAT	62421	11	RecName: Full=Carboxylic ester hydrolase; EC=3.1.1.- OS=Rattus norvegicus (Rat)
	CHDH_RAT	66346	17	RecName: Full=Choline dehydrogenase
	MUG1_RAT	165221	19	RecName: Full=Murinoglobulin-1; AltName: Full=Alpha-1 inhibitor 3 variant I; AltName: Full=Alpha-X protein; Flags: Precursor OS=Rattus norvegicus (Rat)
	MDHM_RAT	35661	12	RecName: Full=Malate dehydrogenase
	CP2A1_RAT	55959	17	RecName: Full=Cytochrome P450 2A1; EC=1.14.14.1; AltName: Full=CYPIIA1; AltName: Full=Cytochrome P450-UT-F; AltName: Full=Steroid hormones 7-alpha-hydroxylase; AltName: Full=Testosterone 7-alpha-hydroxylase OS=Rattus norvegicus (Rat)
	Q5BJZ3_RAT	113796	21	SubName: Full=Nicotinamide nucleotide transhydrogenase {ECO:0000313|EMBL:AAH91271.1}; SubName: Full=Protein Nnt {ECO:0000313|Ensembl:ENSRNOP00000029578} OS=Rattus norvegicus (Rat)
	CP2CN_RAT	56397	19	RecName: Full=Cytochrome P450 2C23; EC=1.14.14.1; AltName: Full=Arachidonic acid epoxygenase; AltName: Full=CYPIIC23 OS=Rattus norvegicus (Rat)
	Q5DT04_RAT	59624	9	SubName: Full=RCG55639
	F1LN88_RAT	56481	19	SubName: Full=Aldehyde dehydrogenase
	CH60_RAT	60917	10	RecName: Full=60 kDa heat shock protein
	CP1A2_RAT	58222	15	RecName: Full=Cytochrome P450 1A2; EC=1.14.14.1; AltName: Full=CYPIA2; AltName: Full=Cytochrome P-448; AltName: Full=Cytochrome P-450d; AltName: Full=Cytochrome P450-D OS=Rattus norvegicus (Rat)
	ADT2_RAT	32880	13	RecName: Full=ADP/ATP translocase 2; AltName: Full=ADP
	S27A5_RAT	76217	18	RecName: Full=Bile acyl-CoA synthetase; Short=BACS; EC=6.2.1.7; AltName: Full=Bile acid-CoA ligase; Short=BA-CoA ligase; Short=BAL; AltName: Full=Cholate--CoA ligase; AltName: Full=Fatty acid transport protein 5; Short=FATP-5; AltName: Full=Solute c
	CP4A2_RAT	57932	21	RecName: Full=Cytochrome P450 4A2; AltName: Full=CYPIVA2; AltName: Full=Cytochrome P-450 K-2; AltName: Full=Cytochrome P450 K-5; AltName: Full=Cytochrome P450-LA-omega 2; AltName: Full=Lauric acid omega-hydroxylase; EC=1.14.15.3; Flags: Precursor OS
	TBB5_RAT	49639	12	RecName: Full=Tubulin beta-5 chain OS=Rattus norvegicus (Rat)
	G3V983_RAT	25878	12	SubName: Full=Glutathione S-transferase Mu 1 {ECO:0000313|Ensembl:ENSRNOP00000039050}; SubName: Full=RCG29047
	HMCS2_RAT	56876	15	RecName: Full=Hydroxymethylglutaryl-CoA synthase
	PHB2_RAT	33292	13	RecName: Full=Prohibitin-2; AltName: Full=B-cell receptor-associated protein BAP37; Short=BAP-37 OS=Rattus norvegicus (Rat)
	NB5R3_RAT	34153	11	RecName: Full=NADH-cytochrome b5 reductase 3; Short=B5R; Short=Cytochrome b5 reductase; EC=1.6.2.2; AltName: Full=Diaphorase-1; Contains: RecName: Full=NADH-cytochrome b5 reductase 3 membrane-bound form; Contains: RecName: Full=NADH-cytochrome b5 re
	AIFM1_RAT	66681	15	RecName: Full=Apoptosis-inducing factor 1
	RDH7_RAT	35713	14	RecName: Full=Retinol dehydrogenase 7; EC=1.1.1.105; AltName: Full=Retinol dehydrogenase type III; Short=RODH III OS=Rattus norvegicus (Rat)
	3BHS5_RAT	42180	12	RecName: Full=3 beta-hydroxysteroid dehydrogenase type 5; AltName: Full=3 beta-hydroxysteroid dehydrogenase type V; Short=3-beta-HSD V; AltName: Full=3-beta-hydroxy-5-ene steroid dehydrogenase; AltName: Full=NADPH-dependent 3-beta-hydroxy-Delta(5)-s
	TBB2A_RAT	49875	12	RecName: Full=Tubulin beta-2A chain OS=Rattus norvegicus (Rat)
	UGGG1_RAT	176320	23	RecName: Full=UDP-glucose:glycoprotein glucosyltransferase 1; Short=UGT1; Short=rUGT1; EC=2.4.1.-; AltName: Full=UDP--Glc:glycoprotein glucosyltransferase; AltName: Full=UDP-glucose ceramide glucosyltransferase-like 1; Flags: Precursor OS=Rattus nor
	CP2A2_RAT	56309	19	RecName: Full=Cytochrome P450 2A2; EC=1.14.14.1; AltName: Full=CYPIIA2; AltName: Full=Cytochrome P450-UT-4; AltName: Full=Testosterone 15-alpha-hydroxylase OS=Rattus norvegicus (Rat)
	FMO3_RAT	59921	16	RecName: Full=Dimethylaniline monooxygenase [N-oxide-forming] 3; EC=1.14.13.8; AltName: Full=Dimethylaniline oxidase 3; AltName: Full=Hepatic flavin-containing monooxygenase 3; Short=FMO 3; AltName: Full=Trimethylamine monooxygenase; EC=1.14.13.148
	CP4AE_RAT	58195	21	RecName: Full=Cytochrome P450 4A14; AltName: Full=CYPIVA14; AltName: Full=Cytochrome P450-LA-omega 3; AltName: Full=Lauric acid omega-hydroxylase; EC=1.14.15.3; Flags: Precursor OS=Rattus norvegicus (Rat)
	PRDX4_RAT	30988	12	RecName: Full=Peroxiredoxin-4; EC=1.11.1.15; AltName: Full=Antioxidant enzyme AOE372; AltName: Full=Peroxiredoxin IV; Short=Prx-IV; AltName: Full=Thioredoxin peroxidase AO372; AltName: Full=Thioredoxin-dependent peroxide reductase A0372; Flags: Prec
	G3V7C6_RAT	49799	12	SubName: Full=RCG45400 {ECO:0000313|EMBL:EDL93630.1}; SubName: Full=Tubulin beta-4B chain {ECO:0000313|Ensembl:ENSRNOP00000013863} OS=Rattus norvegicus (Rat)
	THIM_RAT	41844	14	RecName: Full=3-ketoacyl-CoA thiolase
	Q68G49_RAT	62114	10	RecName: Full=Carboxylic ester hydrolase {ECO:0000256|RuleBase:RU361235}; EC=3.1.1.- {ECO:0000256|RuleBase:RU361235} OS=Rattus norvegicus (Rat)
	HBB1_RAT	15969	13	RecName: Full=Hemoglobin subunit beta-1; AltName: Full=Beta-1-globin; AltName: Full=Hemoglobin beta chain
	ECHP_RAT	78608	17	RecName: Full=Peroxisomal bifunctional enzyme; Short=PBE; Short=PBFE; Includes: RecName: Full=Enoyl-CoA hydratase/3
	Q6T5E9_RAT	60196	11	SubName: Full=Protein LOC100912040 {ECO:0000313|Ensembl:ENSRNOP00000030374}; SubName: Full=RCG55639
	FMO5_RAT	60017	13	RecName: Full=Dimethylaniline monooxygenase [N-oxide-forming] 5; EC=1.14.13.8; AltName: Full=Dimethylaniline oxidase 5; AltName: Full=Hepatic flavin-containing monooxygenase 5; Short=FMO 5 OS=Rattus norvegicus (Rat)
	P97886_RAT	60210	11	SubName: Full=UDP-glucuronosyltransferase {ECO:0000313|EMBL:BAA18960.1}; SubName: Full=UDP-glucuronosyltransferase 1A6 {ECO:0000313|EMBL:AAL67853.1} OS=Rattus norvegicus (Rat)
	EF2_RAT	95223	18	RecName: Full=Elongation factor 2; Short=EF-2 OS=Rattus norvegicus (Rat)
	AL3A2_RAT	54047	14	RecName: Full=Fatty aldehyde dehydrogenase; EC=1.2.1.3; AltName: Full=Aldehyde dehydrogenase 4; AltName: Full=Aldehyde dehydrogenase family 3 member A2; AltName: Full=Microsomal aldehyde dehydrogenase; Short=msALDH OS=Rattus norvegicus (Rat)
	CYB5_RAT	15346	6	RecName: Full=Cytochrome b5 OS=Rattus norvegicus (Rat)
	BAAT_RAT	46435	14	RecName: Full=Bile acid-CoA:amino acid N-acyltransferase; Short=BACAT; Short=BAT; EC=2.3.1.65; AltName: Full=Glycine N-choloyltransferase; AltName: Full=Kan-1; AltName: Full=Long-chain fatty-acyl-CoA hydrolase; EC=3.1.2.2 OS=Rattus norvegicus (Rat)
	QCR1_RAT	52815	16	RecName: Full=Cytochrome b-c1 complex subunit 1
	PHB_RAT	29802	11	RecName: Full=Prohibitin OS=Rattus norvegicus (Rat)
	AL1L1_RAT	98812	16	RecName: Full=Cytosolic 10-formyltetrahydrofolate dehydrogenase; Short=10-FTHFDH; Short=FDH; EC=1.5.1.6; AltName: Full=Aldehyde dehydrogenase family 1 member L1; AltName: Full=FBP-CI OS=Rattus norvegicus (Rat)
	G3V7V6_RAT	67434	19	SubName: Full=All-trans-13
	F1LTS8_RAT	51584	14	SubName: Full=Uncharacterized protein {ECO:0000313|Ensembl:ENSRNOP00000034917}; Flags: Fragment OS=Rattus norvegicus (Rat)
	S27A2_RAT	70648	21	RecName: Full=Very long-chain acyl-CoA synthetase; Short=VLACS; Short=VLCS; EC=6.2.1.-; AltName: Full=Fatty acid transport protein 2; Short=FATP-2; AltName: Full=Fatty-acid-coenzyme A ligase
	CP2B3_RAT	56348	16	RecName: Full=Cytochrome P450 2B3; EC=1.14.14.1; AltName: Full=CYPIIB3 OS=Rattus norvegicus (Rat)
	UDB17_RAT	60485	15	RecName: Full=UDP-glucuronosyltransferase 2B17; Short=UDPGT 2B17; EC=2.4.1.17; AltName: Full=17-beta-hydroxysteroid-specific UDPGT; AltName: Full=RLUG38; AltName: Full=Testosterone
	MIC60_RAT	67135	13	RecName: Full=MICOS complex subunit Mic60; AltName: Full=Mitochondrial inner membrane protein {ECO:0000250|UniProtKB:Q8CAQ8
	FDFT_RAT	48075	11	RecName: Full=Squalene synthase; Short=SQS; Short=SS; EC=2.5.1.21; AltName: Full=FPP:FPP farnesyltransferase; AltName: Full=Farnesyl-diphosphate farnesyltransferase OS=Rattus norvegicus (Rat)
	CP2E1_RAT	56591	18	RecName: Full=Cytochrome P450 2E1; EC=1.14.13.-; AltName: Full=4-nitrophenol 2-hydroxylase; EC=1.14.13.n7; AltName: Full=CYPIIE1; AltName: Full=Cytochrome P450-J; AltName: Full=Cytochrome P450RLM6 OS=Rattus norvegicus (Rat)
	URIC_RAT	34912	13	RecName: Full=Uricase; EC=1.7.3.3; AltName: Full=Urate oxidase OS=Rattus norvegicus (Rat)
	BDH_RAT	38177	14	RecName: Full=D-beta-hydroxybutyrate dehydrogenase
	Q64648_RAT	55858	12	SubName: Full=Cytochrome P450 2C12
	AOFB_RAT	58421	15	RecName: Full=Amine oxidase [flavin-containing] B; EC=1.4.3.4; AltName: Full=Monoamine oxidase type B; Short=MAO-B OS=Rattus norvegicus (Rat)
	UDB37_RAT	60553	15	RecName: Full=UDP-glucuronosyltransferase 2B37; Short=UDPGT 2B37; EC=2.4.1.17; AltName: Full=17-beta-hydroxysteroid-specific UDPGT; AltName: Full=UDP-glucuronosyltransferase R-21; Short=UDPGTr-21; AltName: Full=UDPGTr-5; Flags: Precursor OS=Rattus n
	FAAH1_RAT	63316	10	RecName: Full=Fatty-acid amide hydrolase 1; EC=3.5.1.99; AltName: Full=Anandamide amidohydrolase 1; AltName: Full=Oleamide hydrolase 1 OS=Rattus norvegicus (Rat)
	D3ZXY4_RAT	53464	13	SubName: Full=Protein Aldh8a1 {ECO:0000313|Ensembl:ENSRNOP00000020015} OS=Rattus norvegicus (Rat)
	HS90B_RAT	83229	16	RecName: Full=Heat shock protein HSP 90-beta; AltName: Full=Heat shock 84 kDa; Short=HSP 84; Short=HSP84 OS=Rattus norvegicus (Rat)
	Q8VD45_RAT	59974	7	SubName: Full=UDP-glucuronosyltransferase 1A5 {ECO:0000313|EMBL:AAL67850.1} OS=Rattus norvegicus (Rat)
	MOGS_RAT	91814	16	RecName: Full=Mannosyl-oligosaccharide glucosidase; EC=3.2.1.106; AltName: Full=Glycoprotein-processing glucosidase I OS=Rattus norvegicus (Rat)
	D3ZFJ6_RAT	60382	10	SubName: Full=Lactamase
	F1M7N8_RAT	60555	14	SubName: Full=Protein LOC102550717 {ECO:0000313|Ensembl:ENSRNOP00000045002} OS=Rattus norvegicus (Rat)
	CALR_RAT	47966	15	RecName: Full=Calreticulin; AltName: Full=CALBP; AltName: Full=CRP55; AltName: Full=Calcium-binding protein 3; Short=CABP3; AltName: Full=Calregulin; AltName: Full=Endoplasmic reticulum resident protein 60; Short=ERp60; AltName: Full=HACBP; Flags: P
	RSSA_RAT	32803	9	RecName: Full=40S ribosomal protein SA {ECO:0000255|HAMAP-Rule:MF_03016}; AltName: Full=37 kDa laminin receptor precursor {ECO:0000255|HAMAP-Rule:MF_03016}; Short=37LRP {ECO:0000255|HAMAP-Rule:MF_03016}; AltName: Full=37/67 kDa laminin receptor {ECO
	DHB13_RAT	33473	12	RecName: Full=17-beta-hydroxysteroid dehydrogenase 13; Short=17-beta-HSD 13; EC=1.1.-.-; AltName: Full=Short-chain dehydrogenase/reductase 9; Flags: Precursor OS=Rattus norvegicus (Rat)
	NDUAA_RAT	40468	11	RecName: Full=NADH dehydrogenase [ubiquinone] 1 alpha subcomplex subunit 10
	NDUS1_RAT	79362	14	RecName: Full=NADH-ubiquinone oxidoreductase 75 kDa subunit
	B5AMZ7_RAT	56120	17	SubName: Full=Cytochrome P450 2C22 {ECO:0000313|EMBL:ACF77018.1}; SubName: Full=Cytochrome P450
	PGRC1_RAT	21585	8	RecName: Full=Membrane-associated progesterone receptor component 1; AltName: Full=25-DX; AltName: Full=Acidic 25 kDa protein; AltName: Full=Ventral midline antigen; Short=VEMA OS=Rattus norvegicus (Rat)
	ACTC_RAT	41992	9	RecName: Full=Actin
	DHB4_RAT	79378	14	RecName: Full=Peroxisomal multifunctional enzyme type 2; Short=MFE-2; AltName: Full=17-beta-hydroxysteroid dehydrogenase 4; Short=17-beta-HSD 4; AltName: Full=D-bifunctional protein; Short=DBP; AltName: Full=Multifunctional protein 2; Short=MPF-2; C
	F1LPF6_RAT	115317	15	RecName: Full=Calcium-transporting ATPase {ECO:0000256|RuleBase:RU361146}; EC=3.6.3.8 {ECO:0000256|RuleBase:RU361146} OS=Rattus norvegicus (Rat)
	B4F768_RAT	62912	11	SubName: Full=Aldh4a1 protein {ECO:0000313|EMBL:AAI68153.1}; Flags: Fragment OS=Rattus norvegicus (Rat)
	HBB2_RAT	15972	12	RecName: Full=Hemoglobin subunit beta-2; AltName: Full=Beta-2-globin; AltName: Full=Hemoglobin beta chain
	OST48_RAT	48865	11	RecName: Full=Dolichyl-diphosphooligosaccharide--protein glycosyltransferase 48 kDa subunit; Short=DDOST 48 kDa subunit; Short=Oligosaccharyl transferase 48 kDa subunit; EC=2.4.99.18; Flags: Precursor OS=Rattus norvegicus (Rat)
	CP4F1_RAT	59830	14	RecName: Full=Cytochrome P450 4F1; EC=1.14.14.1; AltName: Full=CYPIVF1; AltName: Full=Cytochrome P450-A3 OS=Rattus norvegicus (Rat)
	DNJC3_RAT	57525	13	RecName: Full=DnaJ homolog subfamily C member 3; AltName: Full=Interferon-induced
	ACADL_RAT	47842	8	RecName: Full=Long-chain specific acyl-CoA dehydrogenase
	CAH3_RAT	29413	13	RecName: Full=Carbonic anhydrase 3; EC=4.2.1.1; AltName: Full=Carbonate dehydratase III; AltName: Full=Carbonic anhydrase III; Short=CA-III OS=Rattus norvegicus (Rat)
	B0K021_RAT	29977	12	SubName: Full=RCG45476
	F1LZ34_RAT	24486	8	SubName: Full=Uncharacterized protein {ECO:0000313|Ensembl:ENSRNOP00000015190}; Flags: Fragment OS=Rattus norvegicus (Rat)
	F1LRA1_RAT	57909	9	SubName: Full=Protein ERGIC-53 {ECO:0000313|Ensembl:ENSRNOP00000035966} OS=Rattus norvegicus (Rat)
	PLMN_RAT	90477	12	RecName: Full=Plasminogen; EC=3.4.21.7; Contains: RecName: Full=Plasmin heavy chain A; Contains: RecName: Full=Activation peptide; Contains: RecName: Full=Angiostatin; Contains: RecName: Full=Plasmin heavy chain A
	METK1_RAT	43670	8	RecName: Full=S-adenosylmethionine synthase isoform type-1; Short=AdoMet synthase 1; EC=2.5.1.6; AltName: Full=Methionine adenosyltransferase 1; Short=MAT 1; AltName: Full=Methionine adenosyltransferase I/III; Short=MAT-I/III OS=Rattus norvegicus (R
	SUOX_RAT	60768	7	RecName: Full=Sulfite oxidase
	CALX_RAT	67213	11	RecName: Full=Calnexin; Flags: Precursor OS=Rattus norvegicus (Rat)
	Q68G32_RAT	60707	7	SubName: Full=Ugt1a7c protein {ECO:0000313|EMBL:AAH78732.1}; Flags: Fragment OS=Rattus norvegicus (Rat)
	QCR2_RAT	48366	9	RecName: Full=Cytochrome b-c1 complex subunit 2
	AL7A1_RAT	58711	10	RecName: Full=Alpha-aminoadipic semialdehyde dehydrogenase; Short=Alpha-AASA dehydrogenase; EC=1.2.1.31; AltName: Full=Aldehyde dehydrogenase family 7 member A1; EC=1.2.1.3; AltName: Full=Antiquitin-1; AltName: Full=Betaine aldehyde dehydrogenase; E
	B5DFA3_RAT	65315	13	SubName: Full=Bucs1 protein {ECO:0000313|EMBL:AAI68985.1} OS=Rattus norvegicus (Rat)
	PH4H_RAT	51789	14	RecName: Full=Phenylalanine-4-hydroxylase; Short=PAH; EC=1.14.16.1; AltName: Full=Phe-4-monooxygenase OS=Rattus norvegicus (Rat)
	NSDHL_RAT	40386	10	RecName: Full=Sterol-4-alpha-carboxylate 3-dehydrogenase
	D4A7D7_RAT	89783	13	SubName: Full=Hexose-6-phosphate dehydrogenase (Glucose 1-dehydrogenase) (Predicted)
	ACOX2_RAT	76750	10	RecName: Full=Peroxisomal acyl-coenzyme A oxidase 2; EC=1.17.99.3; AltName: Full=3-alpha
	Q6I7R1_RAT	36378	11	SubName: Full=Dehydrogenase/reductase (SDR family) member 7 {ECO:0000313|EMBL:AAI04714.1}; SubName: Full=Down-regulated in nephrectomized rat kidney #3 {ECO:0000313|EMBL:BAD23896.1}; SubName: Full=Protein Dhrs7l1 {ECO:0000313|Ensembl:ENSRNOP00000036
	ABCD3_RAT	75267	8	RecName: Full=ATP-binding cassette sub-family D member 3; AltName: Full=70 kDa peroxisomal membrane protein; Short=PMP70 OS=Rattus norvegicus (Rat)
	B0BNG1_RAT	51055	9	SubName: Full=Prodh2 protein {ECO:0000313|EMBL:AAI58807.1} OS=Rattus norvegicus (Rat)
	B2RYR8_RAT	24190	8	RecName: Full=40S ribosomal protein S8 {ECO:0000256|RuleBase:RU000669} OS=Rattus norvegicus (Rat)
	O89035_RAT	31434	9	SubName: Full=Mitochondrial dicarboxylate carrier {ECO:0000313|EMBL:CAA11278.1}; SubName: Full=Protein Slc25a10 {ECO:0000313|Ensembl:ENSRNOP00000051846}; SubName: Full=Solute carrier family 25 (Mitochondrial carrier dicarboxylate transporter)
	VDAC3_RAT	30778	9	RecName: Full=Voltage-dependent anion-selective channel protein 3; Short=VDAC-3; Short=rVDAC3; AltName: Full=Outer mitochondrial membrane protein porin 3 OS=Rattus norvegicus (Rat)
	F1LQJ4_RAT	53821	10	SubName: Full=Protein LOC501233 {ECO:0000313|Ensembl:ENSRNOP00000020775} OS=Rattus norvegicus (Rat)
	G3V826_RAT	71113	12	RecName: Full=Transketolase {ECO:0000256|RuleBase:RU004996}; EC=2.2.1.1 {ECO:0000256|RuleBase:RU004996} OS=Rattus norvegicus (Rat)
	NUCB2_RAT	50059	10	RecName: Full=Nucleobindin-2; AltName: Full=DNA-binding protein NEFA; AltName: Full=Prepronesfatin; Contains: RecName: Full=Nesfatin-1; Flags: Precursor OS=Rattus norvegicus (Rat)
	APOB_RAT	535688	15	RecName: Full=Apolipoprotein B-100; Short=Apo B-100; Contains: RecName: Full=Apolipoprotein B-48; Short=Apo B-48; Flags: Precursor OS=Rattus norvegicus (Rat)
	EST1E_RAT	61675	11	RecName: Full=Carboxylesterase 1E; EC=3.1.1.1; AltName: Full=Carboxyesterase ES-3; AltName: Full=ES-HTEL; AltName: Full=Egasyn; AltName: Full=Liver carboxylesterase 3; AltName: Full=pI 5.5 esterase; Flags: Precursor OS=Rattus norvegicus (Rat)
	D4AEH9_RAT	174220	12	SubName: Full=Amylo-1
	GSTM4_RAT	25664	8	RecName: Full=Glutathione S-transferase Yb-3; EC=2.5.1.18; AltName: Full=Chain 4; AltName: Full=GST Yb3; AltName: Full=GST class-mu 3 OS=Rattus norvegicus (Rat)
	F1LP69_RAT	145562	9	SubName: Full=Uncharacterized protein {ECO:0000313|Ensembl:ENSRNOP00000008574} OS=Rattus norvegicus (Rat)
	PYGL_RAT	97421	12	RecName: Full=Glycogen phosphorylase
	M0R757_RAT	50076	10	RecName: Full=Elongation factor 1-alpha {ECO:0000256|RuleBase:RU004060} OS=Rattus norvegicus (Rat)
	F1M3E3_RAT	60485	8	SubName: Full=Protein LOC100361864 {ECO:0000313|Ensembl:ENSRNOP00000063270} OS=Rattus norvegicus (Rat)
	LRC59_RAT	34848	8	RecName: Full=Leucine-rich repeat-containing protein 59; AltName: Full=Protein p34 OS=Rattus norvegicus (Rat)
	B0BMW2_RAT	27233	10	SubName: Full=3-hydroxyacyl-CoA dehydrogenase type-2 {ECO:0000313|Ensembl:ENSRNOP00000043608}; SubName: Full=Hydroxyacyl-Coenzyme A dehydrogenase type II {ECO:0000313|EMBL:EDL86310.1}; SubName: Full=Hydroxysteroid (17-beta) dehydrogenase 10 {ECO:000
	F1LQS3_RAT	33525	7	RecName: Full=60S ribosomal protein L6 {ECO:0000256|RuleBase:RU000662} OS=Rattus norvegicus (Rat)
	G3V9Y1_RAT	228857	10	SubName: Full=Myosin
	Q6TUD3_RAT	44751	9	SubName: Full=LRRGT00111 {ECO:0000313|EMBL:AAQ91067.1}; SubName: Full=Protein Rdh11 {ECO:0000313|Ensembl:ENSRNOP00000040233} OS=Rattus norvegicus (Rat)
	AATM_RAT	47284	11	RecName: Full=Aspartate aminotransferase
	VDAC2_RAT	31726	6	RecName: Full=Voltage-dependent anion-selective channel protein 2; Short=VDAC-2; AltName: Full=B36-VDAC; AltName: Full=Outer mitochondrial membrane protein porin 2 OS=Rattus norvegicus (Rat)
	CP3A2_RAT	57694	17	RecName: Full=Cytochrome P450 3A2; EC=1.14.14.1; AltName: Full=CYPIIIA2; AltName: Full=Cytochrome P450-PCN2; AltName: Full=Cytochrome P450/6-beta-A; AltName: Full=Testosterone 6-beta-hydroxylase OS=Rattus norvegicus (Rat)
	FAS_RAT	272478	15	RecName: Full=Fatty acid synthase; EC=2.3.1.85; Includes: RecName: Full=[Acyl-carrier-protein] S-acetyltransferase; EC=2.3.1.38; Includes: RecName: Full=[Acyl-carrier-protein] S-malonyltransferase; EC=2.3.1.39; Includes: RecName: Full=3-oxoacyl-[acy
	ENOA_RAT	47098	9	RecName: Full=Alpha-enolase; EC=4.2.1.11; AltName: Full=2-phospho-D-glycerate hydro-lyase; AltName: Full=Enolase 1; AltName: Full=Non-neural enolase; Short=NNE OS=Rattus norvegicus (Rat)
	TMEDA_RAT	24842	6	RecName: Full=Transmembrane emp24 domain-containing protein 10; AltName: Full=21 kDa transmembrane-trafficking protein; AltName: Full=Transmembrane protein Tmp21; AltName: Full=p24 family protein delta-1; Short=p24delta1; Flags: Precursor OS=Rattus
	D3ZG43_RAT	30208	8	SubName: Full=NADH dehydrogenase (Ubiquinone) Fe-S protein 3 (Predicted)
	HS90A_RAT	84762	12	RecName: Full=Heat shock protein HSP 90-alpha; AltName: Full=Heat shock 86 kDa; Short=HSP 86; Short=HSP86 OS=Rattus norvegicus (Rat)
	HBA_RAT	15319	8	RecName: Full=Hemoglobin subunit alpha-1/2; AltName: Full=Alpha-1/2-globin; AltName: Full=Hemoglobin alpha-1/2 chain OS=Rattus norvegicus (Rat)
	ANXA6_RAT	75706	12	RecName: Full=Annexin A6; AltName: Full=Annexin VI; AltName: Full=Annexin-6; AltName: Full=Calcium-binding protein 65/67; Short=CBP 65/67 OS=Rattus norvegicus (Rat)
	RS3A_RAT	29926	8	RecName: Full=40S ribosomal protein S3a {ECO:0000255|HAMAP-Rule:MF_03122}; AltName: Full=V-fos transformation effector protein; Contains: RecName: Full=40S ribosomal protein S3b OS=Rattus norvegicus (Rat)
	SAC1_RAT	66996	11	RecName: Full=Phosphatidylinositide phosphatase SAC1; EC=3.1.3.-; AltName: Full=Suppressor of actin mutations 1-like protein OS=Rattus norvegicus (Rat)
	ARGI1_RAT	34951	8	RecName: Full=Arginase-1; EC=3.5.3.1; AltName: Full=Liver-type arginase; AltName: Full=Type I arginase OS=Rattus norvegicus (Rat)
	SND1_RAT	101888	14	RecName: Full=Staphylococcal nuclease domain-containing protein 1; AltName: Full=100 kDa coactivator; AltName: Full=SND p102; AltName: Full=p100 co-activator; AltName: Full=p105 coactivator OS=Rattus norvegicus (Rat)
	LDHA_RAT	36427	12	RecName: Full=L-lactate dehydrogenase A chain; Short=LDH-A; EC=1.1.1.27; AltName: Full=LDH muscle subunit; Short=LDH-M OS=Rattus norvegicus (Rat)
	DHI1_RAT	31863	11	RecName: Full=Corticosteroid 11-beta-dehydrogenase isozyme 1; EC=1.1.1.146; AltName: Full=11-beta-hydroxysteroid dehydrogenase 1; Short=11-DH; Short=11-beta-HSD1 OS=Rattus norvegicus (Rat)
	HEMO_RAT	51318	11	RecName: Full=Hemopexin; Flags: Precursor OS=Rattus norvegicus (Rat)
	THIKA_RAT	43806	9	RecName: Full=3-ketoacyl-CoA thiolase A
	AT1A1_RAT	112982	10	RecName: Full=Sodium/potassium-transporting ATPase subunit alpha-1; Short=Na(+)/K(+) ATPase alpha-1 subunit; EC=3.6.3.9; AltName: Full=Sodium pump subunit alpha-1; Flags: Precursor OS=Rattus norvegicus (Rat)
	SDHB_RAT	31809	9	RecName: Full=Succinate dehydrogenase [ubiquinone] iron-sulfur subunit
	DHB11_RAT	32917	10	RecName: Full=Estradiol 17-beta-dehydrogenase 11; EC=1.1.1.-; AltName: Full=17-beta-hydroxysteroid dehydrogenase 11; Short=17-beta-HSD 11; Short=17bHSD11; Short=17betaHSD11; AltName: Full=17-beta-hydroxysteroid dehydrogenase XI; Short=17-beta-HSD XI
	X1WI37_RAT	29448	12	SubName: Full=Protein LOC100362640 {ECO:0000313|Ensembl:ENSRNOP00000004278}; Flags: Fragment OS=Rattus norvegicus (Rat)
	D4ACG2_RAT	72224	11	SubName: Full=IlvB (Bacterial acetolactate synthase)-like (Predicted)
	G3V6I4_RAT	37766	9	SubName: Full=Protein Marc1 {ECO:0000313|Ensembl:ENSRNOP00000005459}; SubName: Full=RCG20363
	ATPO_RAT	23383	10	RecName: Full=ATP synthase subunit O
	E9PTU4_RAT	227156	9	SubName: Full=Myosin-11 {ECO:0000313|Ensembl:ENSRNOP00000043197} OS=Rattus norvegicus (Rat)
	DHB2_RAT	41939	10	RecName: Full=Estradiol 17-beta-dehydrogenase 2; EC=1.1.1.62; AltName: Full=17-beta-hydroxysteroid dehydrogenase type 2; Short=17-beta-HSD 2; AltName: Full=Testosterone 17-beta-dehydrogenase; EC=1.1.1.239 OS=Rattus norvegicus (Rat)
	G3V7K3_RAT	120589	9	SubName: Full=Ceruloplasmin {ECO:0000313|Ensembl:ENSRNOP00000016083}; SubName: Full=Ceruloplasmin
	DPYS_RAT	56779	9	RecName: Full=Dihydropyrimidinase; Short=DHP; Short=DHPase; EC=3.5.2.2; AltName: Full=Dihydropyrimidine amidohydrolase; AltName: Full=Hydantoinase OS=Rattus norvegicus (Rat)
	SAHH_RAT	47507	11	RecName: Full=Adenosylhomocysteinase; Short=AdoHcyase; EC=3.3.1.1; AltName: Full=S-adenosyl-L-homocysteine hydrolase OS=Rattus norvegicus (Rat)
	ACOX1_RAT	74631	9	RecName: Full=Peroxisomal acyl-coenzyme A oxidase 1; Short=AOX; EC=1.3.3.6; AltName: Full=Palmitoyl-CoA oxidase; Contains: RecName: Full=Peroxisomal acyl-CoA oxidase 1
	Q6P6R6_RAT	76887	8	SubName: Full=Transglutaminase 2
	RGN_RAT	33368	9	RecName: Full=Regucalcin; Short=RC; AltName: Full=Gluconolactonase; Short=GNL; EC=3.1.1.17; AltName: Full=Senescence marker protein 30; Short=SMP-30 OS=Rattus norvegicus (Rat)
	PON3_RAT	39433	7	RecName: Full=Serum paraoxonase/lactonase 3; EC=3.1.1.2; EC=3.1.1.81; EC=3.1.8.1 OS=Rattus norvegicus (Rat)
	Q6P3V9_RAT	47271	11	SubName: Full=60S ribosomal protein L4 {ECO:0000313|Ensembl:ENSRNOP00000013462}; SubName: Full=RCG58071
	RL18_RAT	21645	8	RecName: Full=60S ribosomal protein L18 OS=Rattus norvegicus (Rat)
	Q5XIH3_RAT	50699	8	SubName: Full=NADH dehydrogenase (Ubiquinone) flavoprotein 1 {ECO:0000313|EMBL:AAH83709.1}; SubName: Full=NADH dehydrogenase (Ubiquinone) flavoprotein 1
	CP4F4_RAT	60011	11	RecName: Full=Cytochrome P450 4F4; EC=1.14.14.1; AltName: Full=CYPIVF4 OS=Rattus norvegicus (Rat)
	NDUA9_RAT	42532	10	RecName: Full=NADH dehydrogenase [ubiquinone] 1 alpha subcomplex subunit 9
	G3V741_RAT	39505	12	SubName: Full=Phosphate carrier protein
	D3ZZC1_RAT	46324	7	SubName: Full=Protein Txndc5 {ECO:0000313|Ensembl:ENSRNOP00000018310}; SubName: Full=RCG43947 {ECO:0000313|EMBL:EDL98253.1} OS=Rattus norvegicus (Rat)
	Q5VLR5_RAT	46848	10	SubName: Full=BWK4 {ECO:0000313|EMBL:AAO17785.1}; SubName: Full=Protein Erp44 {ECO:0000313|Ensembl:ENSRNOP00000007711}; SubName: Full=RCG60340 {ECO:0000313|EMBL:EDL78194.1} OS=Rattus norvegicus (Rat)
	RLA2_RAT	11685	6	RecName: Full=60S acidic ribosomal protein P2 OS=Rattus norvegicus (Rat)
	G3V6S2_RAT	98130	7	RecName: Full=Aconitate hydratase {ECO:0000256|RuleBase:RU361275}; Short=Aconitase {ECO:0000256|RuleBase:RU361275}; EC=4.2.1.3 {ECO:0000256|RuleBase:RU361275} OS=Rattus norvegicus (Rat)
	CPT1A_RAT	88069	11	RecName: Full=Carnitine O-palmitoyltransferase 1
	PIGR_RAT	84745	10	RecName: Full=Polymeric immunoglobulin receptor; Short=PIgR; Short=Poly-Ig receptor; Contains: RecName: Full=Secretory component; Flags: Precursor OS=Rattus norvegicus (Rat)
	MUP_RAT	20724	5	RecName: Full=Major urinary protein; Short=MUP; AltName: Full=Allergen Rat n I; AltName: Full=Alpha(2)-euglobulin; AltName: Full=Alpha-2u-globulin; AltName: Full=alpha-2u globulin PGCL1; AltName: Allergen=Rat n 1; Contains: RecName: Full=15.5 kDa fa
	M0R5K9_RAT	17644	8	SubName: Full=Protein LOC100912024 {ECO:0000313|Ensembl:ENSRNOP00000064678}; Flags: Fragment OS=Rattus norvegicus (Rat)
	MMSA_RAT	57771	15	RecName: Full=Methylmalonate-semialdehyde dehydrogenase [acylating]
	F7FFJ9_RAT	30303	9	RecName: Full=ATP synthase subunit gamma {ECO:0000256|RuleBase:RU004001} OS=Rattus norvegicus (Rat)
	F1LR13_RAT	60627	10	SubName: Full=Atlastin-3 {ECO:0000313|Ensembl:ENSRNOP00000063444} OS=Rattus norvegicus (Rat)
	ETFB_RAT	27670	7	RecName: Full=Electron transfer flavoprotein subunit beta; Short=Beta-ETF OS=Rattus norvegicus (Rat)
	GGLO_RAT	50582	10	RecName: Full=L-gulonolactone oxidase; Short=LGO; EC=1.1.3.8; AltName: Full=L-gulono-gamma-lactone oxidase; Short=GLO OS=Rattus norvegicus (Rat)
	ECHB_RAT	51382	9	RecName: Full=Trifunctional enzyme subunit beta
	APMAP_RAT	42036	8	RecName: Full=Adipocyte plasma membrane-associated protein OS=Rattus norvegicus (Rat)
	M0R660_RAT	35760	5	RecName: Full=Glyceraldehyde-3-phosphate dehydrogenase {ECO:0000256|RuleBase:RU361160}; EC=1.2.1.12 {ECO:0000256|RuleBase:RU361160} OS=Rattus norvegicus (Rat)
	VAT1_RAT	43091	6	RecName: Full=Synaptic vesicle membrane protein VAT-1 homolog; EC=1.-.-.-; AltName: Full=Mitofusin-binding protein; Short=Protein MIB OS=Rattus norvegicus (Rat)
	B5DEL8_RAT	12692	7	SubName: Full=NADH dehydrogenase (Ubiquinone) Fe-S protein 5 {ECO:0000313|EMBL:AAI68721.1}; SubName: Full=Protein LOC100361505 {ECO:0000313|Ensembl:ENSRNOP00000037699}; SubName: Full=RCG31129
	IDHC_RAT	46705	5	RecName: Full=Isocitrate dehydrogenase [NADP] cytoplasmic; Short=IDH; EC=1.1.1.42; AltName: Full=Cytosolic NADP-isocitrate dehydrogenase; AltName: Full=IDP; AltName: Full=NADP(+)-specific ICDH; AltName: Full=Oxalosuccinate decarboxylase OS=Rattus no
	D4A132_RAT	61054	8	SubName: Full=Protein Ugt2b10 {ECO:0000313|Ensembl:ENSRNOP00000002728} OS=Rattus norvegicus (Rat)
	RS3_RAT	26657	10	RecName: Full=40S ribosomal protein S3; EC=4.2.99.18 {ECO:0000250|UniProtKB:P23396} OS=Rattus norvegicus (Rat)
	AOFA_RAT	59470	13	RecName: Full=Amine oxidase [flavin-containing] A; EC=1.4.3.4; AltName: Full=Monoamine oxidase type A; Short=MAO-A OS=Rattus norvegicus (Rat)
	ASGR1_RAT	32828	8	RecName: Full=Asialoglycoprotein receptor 1; Short=ASGP-R 1; Short=ASGPR 1; AltName: Full=Hepatic lectin 1; Short=HL-1; Short=rHL-1 OS=Rattus norvegicus (Rat)
	KAD2_RAT	26363	9	RecName: Full=Adenylate kinase 2
	M2GD_RAT	95987	7	RecName: Full=Dimethylglycine dehydrogenase
	DHSO_RAT	38210	9	RecName: Full=Sorbitol dehydrogenase; EC=1.1.1.14; AltName: Full=L-iditol 2-dehydrogenase OS=Rattus norvegicus (Rat)
	Q6AYS2_RAT	35565	6	RecName: Full=Sideroflexin {ECO:0000256|RuleBase:RU362000} OS=Rattus norvegicus (Rat)
	DIDH_RAT	37004	8	RecName: Full=3-alpha-hydroxysteroid dehydrogenase; Short=3-alpha-HSD; EC=1.1.1.50; AltName: Full=Hydroxyprostaglandin dehydrogenase OS=Rattus norvegicus (Rat)
	D3ZSA9_RAT	133359	9	SubName: Full=Protein Nomo1 {ECO:0000313|Ensembl:ENSRNOP00000028680}; SubName: Full=Similar to pM5 protein; DNA segment
	ST1A1_RAT	33884	6	RecName: Full=Sulfotransferase 1A1; Short=ST1A1; EC=2.8.2.1; AltName: Full=Aryl sulfotransferase; AltName: Full=Aryl sulfotransferase IV; Short=ASTIV; AltName: Full=Minoxidil sulfotransferase; Short=Mx-ST; AltName: Full=PST-1; AltName: Full=Phenol s
	PPIB_RAT	23788	10	RecName: Full=Peptidyl-prolyl cis-trans isomerase B; Short=PPIase B; EC=5.2.1.8; AltName: Full=CYP-S1; AltName: Full=Cyclophilin B; AltName: Full=Rotamase B; AltName: Full=S-cyclophilin; Short=SCYLP; Flags: Precursor OS=Rattus norvegicus (Rat)
	PRDX6_RAT	24803	6	RecName: Full=Peroxiredoxin-6; EC=1.11.1.15; AltName: Full=1-Cys peroxiredoxin; Short=1-Cys PRX; AltName: Full=Acidic calcium-independent phospholipase A2; Short=aiPLA2; EC=3.1.1.-; AltName: Full=Antioxidant protein 2; AltName: Full=Non-selenium glu
	SPA3K_RAT	46532	7	RecName: Full=Serine protease inhibitor A3K; Short=Serpin A3K; AltName: Full=CPI-21; AltName: Full=Contrapsin-like protease inhibitor 1; AltName: Full=GHR-P63; AltName: Full=Growth hormone-regulated proteinase inhibitor; AltName: Full=Kallikrein-bin
	FABPL_RAT	14263	6	RecName: Full=Fatty acid-binding protein
	FETUA_RAT	37958	6	RecName: Full=Alpha-2-HS-glycoprotein; AltName: Full=59 kDa bone sialic acid-containing protein; Short=BSP; AltName: Full=Fetuin-A; AltName: Full=Glycoprotein PP63; Flags: Precursor OS=Rattus norvegicus (Rat)
	KPYR_RAT	62162	10	RecName: Full=Pyruvate kinase PKLR; EC=2.7.1.40; AltName: Full=L-PK; AltName: Full=Pyruvate kinase isozymes L/R OS=Rattus norvegicus (Rat)
	SAM50_RAT	51927	5	RecName: Full=Sorting and assembly machinery component 50 homolog OS=Rattus norvegicus (Rat)
	GNMT_RAT	32528	6	RecName: Full=Glycine N-methyltransferase; EC=2.1.1.20; AltName: Full=Folate-binding protein OS=Rattus norvegicus (Rat)
	G3V728_RAT	33325	5	SubName: Full=4-nitrophenylphosphatase domain and non-neuronal SNAP25-like protein homolog 1 (C. elegans)
	AK1D1_RAT	37354	11	RecName: Full=3-oxo-5-beta-steroid 4-dehydrogenase; EC=1.3.1.3; AltName: Full=Aldo-keto reductase family 1 member D1; AltName: Full=Delta(4)-3-ketosteroid 5-beta-reductase; AltName: Full=Delta(4)-3-oxosteroid 5-beta-reductase OS=Rattus norvegicus (R
	RL3_RAT	46107	8	RecName: Full=60S ribosomal protein L3; AltName: Full=L4 OS=Rattus norvegicus (Rat)
	MET7B_RAT	27886	9	RecName: Full=Methyltransferase-like protein 7B; EC=2.1.1.-; AltName: Full=Associated with lipid droplet protein 1; Short=ALDI; Flags: Precursor OS=Rattus norvegicus (Rat)
	ADT1_RAT	32968	9	RecName: Full=ADP/ATP translocase 1; AltName: Full=ADP
	CP51A_RAT	56670	12	RecName: Full=Lanosterol 14-alpha demethylase; Short=LDM; EC=1.14.13.70; AltName: Full=CYPLI; AltName: Full=Cytochrome P450 51A1; AltName: Full=Cytochrome P450-14DM; Short=Cytochrome P45014DM; AltName: Full=Cytochrome P450LI; AltName: Full=Sterol 14
	CP2B2_RAT	55897	6	RecName: Full=Cytochrome P450 2B2; EC=1.14.14.1; AltName: Full=CYPIIB2; AltName: Full=Cytochrome P450 PB4; AltName: Full=Cytochrome P450E OS=Rattus norvegicus (Rat)
	GSTA3_RAT	25303	8	RecName: Full=Glutathione S-transferase alpha-3; EC=2.5.1.18; AltName: Full=GST 2-2; AltName: Full=GST A3-3; AltName: Full=GST AA; AltName: Full=Glutathione S-transferase Yc-1; Short=GST Yc1 OS=Rattus norvegicus (Rat)
	CP3A1_RAT	57880	13	RecName: Full=Cytochrome P450 3A1; EC=1.14.14.1; AltName: Full=CYPIIIA1; AltName: Full=Cytochrome P450-PCN1 OS=Rattus norvegicus (Rat)
	SPEB_RAT	37963	5	RecName: Full=Agmatinase
	D4A8U5_RAT	117282	8	SubName: Full=Dynamin-like 120 kDa protein
	RLA0_RAT	34194	8	RecName: Full=60S acidic ribosomal protein P0; AltName: Full=60S ribosomal protein L10E OS=Rattus norvegicus (Rat)
	OTC_RAT	39861	9	RecName: Full=Ornithine carbamoyltransferase
	A1A5L2_RAT	63310	10	SubName: Full=Pgm1 protein {ECO:0000313|EMBL:AAI28704.1}; Flags: Fragment OS=Rattus norvegicus (Rat)
	A0JN30_RAT	20696	7	SubName: Full=Canopy 2 homolog (Zebrafish) {ECO:0000313|EMBL:AAI26102.1}; SubName: Full=Protein Cnpy2 {ECO:0000313|Ensembl:ENSRNOP00000004895}; SubName: Full=RCG42492 {ECO:0000313|EMBL:EDL84873.1} OS=Rattus norvegicus (Rat)
	THTR_RAT	33386	9	RecName: Full=Thiosulfate sulfurtransferase; EC=2.8.1.1; AltName: Full=Rhodanese OS=Rattus norvegicus (Rat)
	ATAD3_RAT	66718	7	RecName: Full=ATPase family AAA domain-containing protein 3 OS=Rattus norvegicus (Rat)
	Q6AXY8_RAT	33993	7	SubName: Full=Dehydrogenase/reductase (SDR family) member 1 {ECO:0000313|EMBL:AAH79263.1}; SubName: Full=Dehydrogenase/reductase (SDR family) member 1
	DHRS4_RAT	29803	7	RecName: Full=Dehydrogenase/reductase SDR family member 4; EC=1.1.1.184; AltName: Full=NADPH-dependent carbonyl reductase/NADP-retinol dehydrogenase; Short=CR; Short=PHCR; AltName: Full=NADPH-dependent retinol dehydrogenase/reductase; Short=NDRD; Al
	SCPDL_RAT	47058	9	RecName: Full=Saccharopine dehydrogenase-like oxidoreductase; EC=1.-.-.- OS=Rattus norvegicus (Rat)
	F7F469_RAT	157673	5	SubName: Full=Protein Igtp {ECO:0000313|Ensembl:ENSRNOP00000034525} OS=Rattus norvegicus (Rat)
	Q32Q55_RAT	62370	6	RecName: Full=Carboxylic ester hydrolase {ECO:0000256|RuleBase:RU361235}; EC=3.1.1.- {ECO:0000256|RuleBase:RU361235} OS=Rattus norvegicus (Rat)
	HAOX2_RAT	39176	5	RecName: Full=Hydroxyacid oxidase 2; Short=HAOX2; EC=1.1.3.15; AltName: Full=(S)-2-hydroxy-acid oxidase
	CP2A3_RAT	56474	5	RecName: Full=Cytochrome P450 2A3; EC=1.14.14.1; AltName: Full=CYPIIA3; AltName: Full=Coumarin 7-hydroxylase OS=Rattus norvegicus (Rat)
	M0RCY2_RAT	17762	6	SubName: Full=Protein LOC683961 {ECO:0000313|Ensembl:ENSRNOP00000067470} OS=Rattus norvegicus (Rat)
	D3ZPU3_RAT	32105	7	SubName: Full=Very-long-chain 3-oxoacyl-CoA reductase {ECO:0000313|Ensembl:ENSRNOP00000041197} OS=Rattus norvegicus (Rat)
	BUP1_RAT	44014	4	RecName: Full=Beta-ureidopropionase; EC=3.5.1.6 {ECO:0000269|PubMed:8449931}; AltName: Full=Beta-alanine synthase; AltName: Full=N-carbamoyl-beta-alanine amidohydrolase OS=Rattus norvegicus (Rat)
	F16P1_RAT	39584	4	RecName: Full=Fructose-1
	M0R4U4_RAT	26403	6	RecName: Full=Triosephosphate isomerase {ECO:0000256|RuleBase:RU000517}; EC=5.3.1.1 {ECO:0000256|RuleBase:RU000517}; Flags: Fragment OS=Rattus norvegicus (Rat)
	AT5F1_RAT	28850	6	RecName: Full=ATP synthase F(0) complex subunit B1
	STML2_RAT	38390	7	RecName: Full=Stomatin-like protein 2
	AL9A1_RAT	53618	11	RecName: Full=4-trimethylaminobutyraldehyde dehydrogenase; Short=TMABADH; EC=1.2.1.47; AltName: Full=Aldehyde dehydrogenase family 9 member A1; EC=1.2.1.3 OS=Rattus norvegicus (Rat)
	M0RCU5_RAT	24463	8	SubName: Full=Protein Urad {ECO:0000313|Ensembl:ENSRNOP00000067429}; SubName: Full=RCG42793 {ECO:0000313|EMBL:EDL89563.1} OS=Rattus norvegicus (Rat)
	PPIA_RAT	17863	7	RecName: Full=Peptidyl-prolyl cis-trans isomerase A; Short=PPIase A; EC=5.2.1.8; AltName: Full=Cyclophilin A; AltName: Full=Cyclosporin A-binding protein; AltName: Full=Rotamase A; AltName: Full=p1B15; AltName: Full=p31; Contains: RecName: Full=Pept
	B2GV28_RAT	55854	5	SubName: Full=Cyp2b1 protein {ECO:0000313|EMBL:AAI66502.1}; SubName: Full=Cytochrome P450 2B1 {ECO:0000313|Ensembl:ENSRNOP00000049925}; SubName: Full=RCG53888 {ECO:0000313|EMBL:EDM07990.1} OS=Rattus norvegicus (Rat)
	O55211_RAT	28118	10	SubName: Full=Ribosomal protein S2 {ECO:0000313|EMBL:AAC04621.1} OS=Rattus norvegicus (Rat)
	Q6QI47_RAT	50942	6	SubName: Full=LRRGT00161 {ECO:0000313|EMBL:AAS66252.1} OS=Rattus norvegicus (Rat)
	B0K031_RAT	30294	10	SubName: Full=60S ribosomal protein L7 {ECO:0000313|Ensembl:ENSRNOP00000009431}; SubName: Full=RCG30479
	CO4_RAT	192042	14	RecName: Full=Complement C4; Contains: RecName: Full=Complement C4 beta chain; Contains: RecName: Full=Complement C4 alpha chain; Contains: RecName: Full=C4a anaphylatoxin; Contains: RecName: Full=Complement C4 gamma chain; Flags: Precursor OS=Rattu
	HACL1_RAT	63575	7	RecName: Full=2-hydroxyacyl-CoA lyase 1; EC=4.1.-.-; AltName: Full=2-hydroxyphytanoyl-CoA lyase; Short=2-HPCL; AltName: Full=Phytanoyl-CoA 2-hydroxylase 2 OS=Rattus norvegicus (Rat)
	B4F7C9_RAT	80545	10	SubName: Full=Protein Stt3a {ECO:0000313|Ensembl:ENSRNOP00000040087}; SubName: Full=Stt3a protein {ECO:0000313|EMBL:AAI68223.1} OS=Rattus norvegicus (Rat)
	D3ZVL1_RAT	87370	7	SubName: Full=Protein LOC100912115 {ECO:0000313|Ensembl:ENSRNOP00000056080} OS=Rattus norvegicus (Rat)
	S61A1_RAT	52231	5	RecName: Full=Protein transport protein Sec61 subunit alpha isoform 1; Short=Sec61 alpha-1 OS=Rattus norvegicus (Rat)
	M0R4N4_RAT	35920	7	SubName: Full=Uncharacterized protein {ECO:0000313|Ensembl:ENSRNOP00000064322} OS=Rattus norvegicus (Rat)
	SUCA_RAT	36125	5	RecName: Full=Succinyl-CoA ligase [ADP/GDP-forming] subunit alpha
	VAPA_RAT	27823	5	RecName: Full=Vesicle-associated membrane protein-associated protein A; Short=VAMP-A; Short=VAMP-associated protein A; Short=VAP-A; AltName: Full=33 kDa VAMP-associated protein; Short=VAP-33 OS=Rattus norvegicus (Rat)
	B0BN81_RAT	22892	5	SubName: Full=40S ribosomal protein S5 {ECO:0000313|Ensembl:ENSRNOP00000026528}; SubName: Full=Ribosomal protein S5
	D4ABI7_RAT	43076	5	SubName: Full=Protein LOC100365676 {ECO:0000313|Ensembl:ENSRNOP00000045049}; SubName: Full=Similar to Butyrate-induced transcript 1 (Predicted) {ECO:0000313|EMBL:EDL95810.1} OS=Rattus norvegicus (Rat)
	B2GV99_RAT	17002	4	SubName: Full=Myl6 protein {ECO:0000313|EMBL:AAI66586.1} OS=Rattus norvegicus (Rat)
	Q9EQS4_RAT	43552	8	SubName: Full=Cystathionase (Cystathionine gamma-lyase) {ECO:0000313|EMBL:AAH78869.1}; SubName: Full=Cystathionine gamma-lyase {ECO:0000313|EMBL:BAB19922.2
	Q5PQK5_RAT	68501	10	SubName: Full=Radixin {ECO:0000313|EMBL:AAH87147.1} OS=Rattus norvegicus (Rat)
	A0A096MIT3_RAT	33081	4	SubName: Full=Peroxisomal trans-2-enoyl-CoA reductase {ECO:0000313|Ensembl:ENSRNOP00000021512} OS=Rattus norvegicus (Rat)
	F1LPB8_RAT	47361	5	SubName: Full=Ectonucleoside triphosphate diphosphohydrolase 5 {ECO:0000313|Ensembl:ENSRNOP00000041026}; SubName: Full=Ectonucleoside triphosphate diphosphohydrolase 5
	B0BN52_RAT	33506	10	SubName: Full=Mitochondrial carrier 2 {ECO:0000313|EMBL:AHO49121.1}; SubName: Full=Mitochondrial carrier homolog 2 (C. elegans) {ECO:0000313|EMBL:AAI58688.1}; SubName: Full=Mitochondrial carrier homolog 2 (C. elegans) (Predicted)
	TECR_RAT	36099	7	RecName: Full=Very-long-chain enoyl-CoA reductase {ECO:0000305}; EC=1.3.1.93 {ECO:0000250|UniProtKB:Q9NZ01}; AltName: Full=Synaptic glycoprotein SC2; AltName: Full=Trans-2
	B0BNG3_RAT	40367	7	SubName: Full=Lman2 protein {ECO:0000313|EMBL:AAI58809.1}; SubName: Full=Protein Lman2 {ECO:0000313|Ensembl:ENSRNOP00000021638}; SubName: Full=RCG24303
	DNJA1_RAT	44839	4	RecName: Full=DnaJ homolog subfamily A member 1; AltName: Full=DnaJ-like protein 1; AltName: Full=Heat shock protein J2; Short=HSJ-2; Flags: Precursor OS=Rattus norvegicus (Rat)
	ACADM_RAT	46526	8	RecName: Full=Medium-chain specific acyl-CoA dehydrogenase
	F1LT35_RAT	17723	8	SubName: Full=Protein RGD1564606 {ECO:0000313|Ensembl:ENSRNOP00000043004}; Flags: Fragment OS=Rattus norvegicus (Rat)
	F1M7X5_RAT	84116	10	SubName: Full=Dipeptidyl peptidase 4 {ECO:0000313|Ensembl:ENSRNOP00000045536} OS=Rattus norvegicus (Rat)
	NDUA5_RAT	13403	4	RecName: Full=NADH dehydrogenase [ubiquinone] 1 alpha subcomplex subunit 5; AltName: Full=Complex I subunit B13; AltName: Full=Complex I-13kD-B; Short=CI-13kD-B; AltName: Full=NADH-ubiquinone oxidoreductase 13 kDa-B subunit OS=Rattus norvegicus (Rat
	CP3AI_RAT	57270	8	RecName: Full=Cytochrome P450 3A18; EC=1.14.14.1; AltName: Full=CYPIIIA18; AltName: Full=Cytochrome P450(6)beta-2 OS=Rattus norvegicus (Rat)
	ECHM_RAT	31496	5	RecName: Full=Enoyl-CoA hydratase
	Q499R7_RAT	37653	3	SubName: Full=Ppa1 protein {ECO:0000313|EMBL:AAH99794.1}; Flags: Fragment OS=Rattus norvegicus (Rat)
	W8BZ34_RAT	73284	8	SubName: Full=DDX3Y {ECO:0000313|EMBL:JAC06681.1} OS=Rattus norvegicus (Rat)
	CSAD_RAT	55214	9	RecName: Full=Cysteine sulfinic acid decarboxylase; EC=4.1.1.29; AltName: Full=Cysteine-sulfinate decarboxylase; AltName: Full=Sulfinoalanine decarboxylase OS=Rattus norvegicus (Rat)
	THIL_RAT	44666	7	RecName: Full=Acetyl-CoA acetyltransferase
	EFTU_RAT	49491	5	RecName: Full=Elongation factor Tu
	D3ZT90_RAT	49681	3	SubName: Full=Glutaryl-Coenzyme A dehydrogenase (Predicted) {ECO:0000313|EMBL:EDL92192.1}; SubName: Full=Protein Gcdh {ECO:0000313|Ensembl:ENSRNOP00000004570} OS=Rattus norvegicus (Rat)
	Q63011_RAT	15896	8	SubName: Full=Zero beta-globin {ECO:0000313|EMBL:AAC60699.1}; Flags: Fragment OS=Rattus norvegicus (Rat)
	CP4V2_RAT	60541	8	RecName: Full=Cytochrome P450 4V2; EC=1.14.13.-; AltName: Full=Docosahexaenoic acid omega-hydroxylase CYP4V2 {ECO:0000305}; EC=1.14.13.199 {ECO:0000250|UniProtKB:Q6ZWL3} OS=Rattus norvegicus (Rat)
	D3ZCZ9_RAT	13032	5	SubName: Full=Protein LOC100912599 {ECO:0000313|Ensembl:ENSRNOP00000036045}; SubName: Full=RCG41951
	B6DYP7_RAT	25591	8	RecName: Full=Glutathione S-transferase {ECO:0000256|RuleBase:RU004454}; EC=2.5.1.18 {ECO:0000256|RuleBase:RU004454} OS=Rattus norvegicus (Rat)
	IF5A1_RAT	16821	4	RecName: Full=Eukaryotic translation initiation factor 5A-1; Short=eIF-5A-1; Short=eIF-5A1; AltName: Full=Eukaryotic initiation factor 5A isoform 1; Short=eIF-5A; AltName: Full=eIF-4D OS=Rattus norvegicus (Rat)
	DOPD_RAT	13125	3	RecName: Full=D-dopachrome decarboxylase; EC=4.1.1.84; AltName: Full=D-dopachrome tautomerase OS=Rattus norvegicus (Rat)
	D4ADS4_RAT	16722	5	SubName: Full=Protein Mgst3 {ECO:0000313|Ensembl:ENSRNOP00000005719}; SubName: Full=RCG46430 {ECO:0000313|EMBL:EDM09282.1} OS=Rattus norvegicus (Rat)
	RL19_RAT	23451	4	RecName: Full=60S ribosomal protein L19 OS=Rattus norvegicus (Rat)
	F1LM05_RAT	68123	6	SubName: Full=Protein LOC299282 {ECO:0000313|Ensembl:ENSRNOP00000013961} OS=Rattus norvegicus (Rat)
	F1LM18_RAT	59187	5	SubName: Full=Polypyrimidine tract-binding protein 1 {ECO:0000313|Ensembl:ENSRNOP00000043256} OS=Rattus norvegicus (Rat)
	RS11_RAT	18419	8	RecName: Full=40S ribosomal protein S11 OS=Rattus norvegicus (Rat)
	ENOG_RAT	47111	3	RecName: Full=Gamma-enolase; EC=4.2.1.11; AltName: Full=2-phospho-D-glycerate hydro-lyase; AltName: Full=Enolase 2; AltName: Full=Neural enolase; AltName: Full=Neuron-specific enolase; Short=NSE OS=Rattus norvegicus (Rat)
	KMO_RAT	54318	6	RecName: Full=Kynurenine 3-monooxygenase {ECO:0000255|HAMAP-Rule:MF_03018}; EC=1.14.13.9 {ECO:0000255|HAMAP-Rule:MF_03018}; AltName: Full=Kynurenine 3-hydroxylase {ECO:0000255|HAMAP-Rule:MF_03018} OS=Rattus norvegicus (Rat)
	Q7TPA1_RAT	36897	6	SubName: Full=Ab1-114 {ECO:0000313|EMBL:AAP92540.1}; SubName: Full=Protein Slc25a15 {ECO:0000313|Ensembl:ENSRNOP00000045952} OS=Rattus norvegicus (Rat)
	D3ZZK1_RAT	13345	4	SubName: Full=Protein LOC100359563 {ECO:0000313|Ensembl:ENSRNOP00000051318} OS=Rattus norvegicus (Rat)
	HPPD_RAT	45084	5	RecName: Full=4-hydroxyphenylpyruvate dioxygenase; EC=1.13.11.27; AltName: Full=4-hydroxyphenylpyruvic acid oxidase; Short=4HPPD; Short=HPD; Short=HPPDase; AltName: Full=F Alloantigen; Short=F protein OS=Rattus norvegicus (Rat)
	AMPL_RAT	56115	7	RecName: Full=Cytosol aminopeptidase; EC=3.4.11.1; AltName: Full=Leucine aminopeptidase 3; Short=LAP-3; AltName: Full=Leucyl aminopeptidase; AltName: Full=Proline aminopeptidase; EC=3.4.11.5; AltName: Full=Prolyl aminopeptidase OS=Rattus norvegicus
	B1WC61_RAT	68800	4	SubName: Full=Acad9 protein {ECO:0000313|EMBL:AAI62016.1}; SubName: Full=Protein Acad9 {ECO:0000313|Ensembl:ENSRNOP00000019108} OS=Rattus norvegicus (Rat)
	HCDH_RAT	34426	7	RecName: Full=Hydroxyacyl-coenzyme A dehydrogenase
	Q7TP91_RAT	83209	4	SubName: Full=Ab1-205 {ECO:0000313|EMBL:AAP92551.1} OS=Rattus norvegicus (Rat)
	D3ZAS9_RAT	38582	3	SubName: Full=Protein Ddrgk1 {ECO:0000313|Ensembl:ENSRNOP00000036810}; SubName: Full=Similar to chromosome 20 open reading frame 116 (Predicted) {ECO:0000313|EMBL:EDL80206.1} OS=Rattus norvegicus (Rat)
	Q562C3_RAT	45194	4	SubName: Full=Glycine C-acetyltransferase (2-amino-3-ketobutyrate-coenzyme A ligase) {ECO:0000313|EMBL:AAH92591.1} OS=Rattus norvegicus (Rat)
	B2RYU2_RAT	17835	4	SubName: Full=RCG45615
	DECR_RAT	36110	6	RecName: Full=2
	PDIA5_RAT	59361	8	RecName: Full=Protein disulfide-isomerase A5; EC=5.3.4.1; Flags: Precursor OS=Rattus norvegicus (Rat)
	FIBA_RAT	86632	10	RecName: Full=Fibrinogen alpha chain; Contains: RecName: Full=Fibrinopeptide A; Contains: RecName: Full=Fibrinogen alpha chain; Flags: Precursor OS=Rattus norvegicus (Rat)
	UGDH_RAT	54857	6	RecName: Full=UDP-glucose 6-dehydrogenase; Short=UDP-Glc dehydrogenase; Short=UDP-GlcDH; Short=UDPGDH; EC=1.1.1.22 OS=Rattus norvegicus (Rat)
	BHMT2_RAT	39903	6	RecName: Full=S-methylmethionine--homocysteine S-methyltransferase BHMT2; Short=SMM-hcy methyltransferase; EC=2.1.1.10; AltName: Full=Betaine--homocysteine S-methyltransferase 2 OS=Rattus norvegicus (Rat)
	Q4V8I9_RAT	56988	8	SubName: Full=Protein Ugp2 {ECO:0000313|Ensembl:ENSRNOP00000063786}; SubName: Full=UDP-glucose pyrophosphorylase 2 {ECO:0000313|EMBL:AAH97369.1}; SubName: Full=UDP-glucose pyrophosphorylase 2
	GPDA_RAT	37428	13	RecName: Full=Glycerol-3-phosphate dehydrogenase [NAD(+)]
	RS6_RAT	28663	6	RecName: Full=40S ribosomal protein S6 OS=Rattus norvegicus (Rat)
	RL15_RAT	24131	7	RecName: Full=60S ribosomal protein L15 OS=Rattus norvegicus (Rat)
	COX5A_RAT	16119	7	RecName: Full=Cytochrome c oxidase subunit 5A
	B1WC34_RAT	59181	6	SubName: Full=Protein Prkcsh {ECO:0000313|Ensembl:ENSRNOP00000018009}; SubName: Full=Protein kinase C substrate 80K-H {ECO:0000313|EMBL:AAI61987.1}; SubName: Full=Protein kinase C substrate 80K-H (Predicted)
	Q6IMX3_RAT	44939	7	SubName: Full=Acetyl-Coenzyme A dehydrogenase
	RAB7A_RAT	23489	7	RecName: Full=Ras-related protein Rab-7a; AltName: Full=Ras-related protein BRL-RAS; AltName: Full=Ras-related protein p23 OS=Rattus norvegicus (Rat)
	NIT2_RAT	30682	7	RecName: Full=Omega-amidase NIT2; EC=3.5.1.3 {ECO:0000269|PubMed:19595734}; AltName: Full=Nitrilase homolog 2 OS=Rattus norvegicus (Rat)
	HEM2_RAT	36008	2	RecName: Full=Delta-aminolevulinic acid dehydratase; Short=ALADH; EC=4.2.1.24; AltName: Full=Porphobilinogen synthase OS=Rattus norvegicus (Rat)
	M0RAS6_RAT	93830	6	SubName: Full=Protein LOC100910979 {ECO:0000313|Ensembl:ENSRNOP00000066633} OS=Rattus norvegicus (Rat)
	B0BNF9_RAT	40942	9	SubName: Full=Hydroxyacid oxidase 1 {ECO:0000313|EMBL:AAI58805.1}; SubName: Full=Hydroxyacid oxidase 1 (Mapped) {ECO:0000313|EMBL:EDL80285.1}; SubName: Full=Protein Hao1 {ECO:0000313|Ensembl:ENSRNOP00000006330} OS=Rattus norvegicus (Rat)
	F1LLV5_RAT	48697	5	SubName: Full=Uncharacterized protein {ECO:0000313|Ensembl:ENSRNOP00000050445} OS=Rattus norvegicus (Rat)
	B0K038_RAT	17960	6	SubName: Full=Rps16 protein {ECO:0000313|EMBL:AAI59439.1}; Flags: Fragment OS=Rattus norvegicus (Rat)
	GLNA_RAT	42240	5	RecName: Full=Glutamine synthetase; Short=GS; EC=6.3.1.2; AltName: Full=Glutamate decarboxylase; EC=4.1.1.15; AltName: Full=Glutamate--ammonia ligase OS=Rattus norvegicus (Rat)
	D4A2Z6_RAT	83539	6	SubName: Full=Protein Sec63 {ECO:0000313|Ensembl:ENSRNOP00000035059}; SubName: Full=SEC63-like (S. cerevisiae) (Predicted) {ECO:0000313|EMBL:EDL99699.1} OS=Rattus norvegicus (Rat)
	FTCD_RAT	58877	7	RecName: Full=Formimidoyltransferase-cyclodeaminase; AltName: Full=58 kDa microtubule-binding protein; AltName: Full=Formiminotransferase-cyclodeaminase; Short=FTCD; Includes: RecName: Full=Glutamate formimidoyltransferase; EC=2.1.2.5; AltName: Full
	UCRI_RAT	29427	7	RecName: Full=Cytochrome b-c1 complex subunit Rieske
	CPT2_RAT	74063	7	RecName: Full=Carnitine O-palmitoyltransferase 2
	PON2_RAT	39593	7	RecName: Full=Serum paraoxonase/arylesterase 2; Short=PON 2; EC=3.1.1.2; EC=3.1.1.81; AltName: Full=Aromatic esterase 2; Short=A-esterase 2; AltName: Full=Serum aryldialkylphosphatase 2 OS=Rattus norvegicus (Rat)
	GBB2_RAT	37307	5	RecName: Full=Guanine nucleotide-binding protein G(I)/G(S)/G(T) subunit beta-2; AltName: Full=G protein subunit beta-2; AltName: Full=Transducin beta chain 2 OS=Rattus norvegicus (Rat)
	PGK1_RAT	44510	4	RecName: Full=Phosphoglycerate kinase 1; EC=2.7.2.3 OS=Rattus norvegicus (Rat)
	F1M9A7_RAT	78155	6	RecName: Full=Acyl-coenzyme A oxidase {ECO:0000256|PIRNR:PIRNR000168} OS=Rattus norvegicus (Rat)
	Q62669_RAT	16012	7	SubName: Full=Protein Hbb-b1 {ECO:0000313|Ensembl:ENSRNOP00000019914}; SubName: Full=Zero beta-1 globin {ECO:0000313|EMBL:CAA47872.1} OS=Rattus norvegicus (Rat)
	F1LRQ1_RAT	144016	7	SubName: Full=Aldehyde oxidase 1 {ECO:0000313|Ensembl:ENSRNOP00000059651} OS=Rattus norvegicus (Rat)
	PGRC2_RAT	23389	3	RecName: Full=Membrane-associated progesterone receptor component 2 OS=Rattus norvegicus (Rat)
	NDUS2_RAT	52528	6	RecName: Full=NADH dehydrogenase [ubiquinone] iron-sulfur protein 2
	Q5U3Z7_RAT	55730	5	RecName: Full=Serine hydroxymethyltransferase {ECO:0000256|RuleBase:RU000585}; EC=2.1.2.1 {ECO:0000256|RuleBase:RU000585} OS=Rattus norvegicus (Rat)
	Q6P9U5_RAT	21908	7	SubName: Full=Ribosomal protein L9 {ECO:0000313|EMBL:AAH60589.1} OS=Rattus norvegicus (Rat)
	M2OM_RAT	34222	7	RecName: Full=Mitochondrial 2-oxoglutarate/malate carrier protein; Short=OGCP; AltName: Full=Solute carrier family 25 member 11 OS=Rattus norvegicus (Rat)
	GRP75_RAT	73812	4	RecName: Full=Stress-70 protein
	Q6PDV6_RAT	16263	5	SubName: Full=Protein LOC100911847 {ECO:0000313|Ensembl:ENSRNOP00000056260}; SubName: Full=RCG46686
	PON1_RAT	39333	5	RecName: Full=Serum paraoxonase/arylesterase 1; Short=PON 1; EC=3.1.1.2; EC=3.1.1.81; EC=3.1.8.1; AltName: Full=Aromatic esterase 1; Short=A-esterase 1; AltName: Full=Serum aryldialkylphosphatase 1 OS=Rattus norvegicus (Rat)
	Q5RKJ9_RAT	22527	3	SubName: Full=RAB10
	Q6PED0_RAT	17939	4	SubName: Full=RCG23287
	A1L1I6_RAT	28337	3	RecName: Full=Reticulon {ECO:0000256|RuleBase:RU210713} OS=Rattus norvegicus (Rat)
	AMACR_RAT	41801	7	RecName: Full=Alpha-methylacyl-CoA racemase; EC=5.1.99.4; AltName: Full=2-arylpropionyl-CoA epimerase; AltName: Full=2-methylacyl-CoA racemase OS=Rattus norvegicus (Rat)
	Q5I0M1_RAT	38432	6	SubName: Full=Apolipoprotein H {ECO:0000313|EMBL:EDM06447.1}; SubName: Full=Apolipoprotein H (Beta-2-glycoprotein I) {ECO:0000313|EMBL:AAH88180.1}; SubName: Full=Beta-2-glycoprotein 1 {ECO:0000313|Ensembl:ENSRNOP00000004756} OS=Rattus norvegicus (Ra
	Q5BJN1_RAT	32883	4	SubName: Full=Protein Stard10 {ECO:0000313|Ensembl:ENSRNOP00000026428}; SubName: Full=START domain containing 10
	FAAA_RAT	45946	4	RecName: Full=Fumarylacetoacetase; Short=FAA; EC=3.7.1.2 {ECO:0000250|UniProtKB:P35505}; AltName: Full=Beta-diketonase; AltName: Full=Fumarylacetoacetate hydrolase OS=Rattus norvegicus (Rat)
	MYO1B_RAT	131835	4	RecName: Full=Unconventional myosin-Ib; AltName: Full=Myosin I alpha; Short=MMI-alpha; Short=MMIa; AltName: Full=Myosin heavy chain myr 1 OS=Rattus norvegicus (Rat)
	ACON_RAT	85380	6	RecName: Full=Aconitate hydratase
	HPT_RAT	38539	6	RecName: Full=Haptoglobin; AltName: Full=Liver regeneration-related protein LRRG173; AltName: Full=Zonulin; Contains: RecName: Full=Haptoglobin alpha chain; Contains: RecName: Full=Haptoglobin beta chain; Flags: Precursor OS=Rattus norvegicus (Rat)
	ETFA_RAT	34929	6	RecName: Full=Electron transfer flavoprotein subunit alpha
	D4A6W6_RAT	28139	6	SubName: Full=Protein RGD1561333 {ECO:0000313|Ensembl:ENSRNOP00000047328} OS=Rattus norvegicus (Rat)
	D3ZLL8_RAT	14845	4	SubName: Full=Protein LOC100909878 {ECO:0000313|Ensembl:ENSRNOP00000046737} OS=Rattus norvegicus (Rat)
	B0BNE6_RAT	23955	5	SubName: Full=NADH dehydrogenase (Ubiquinone) Fe-S protein 8 (Predicted)
	NCLN_RAT	62952	5	RecName: Full=Nicalin; AltName: Full=Nicastrin-like protein; Flags: Precursor OS=Rattus norvegicus (Rat)
	Q68FY4_RAT	53483	5	SubName: Full=Group specific component {ECO:0000313|EMBL:AAH78891.1}; SubName: Full=Group specific component
	D3ZJ08_RAT	15379	3	RecName: Full=Histone H3 {ECO:0000256|RuleBase:RU004471} OS=Rattus norvegicus (Rat)
	NDUV2_RAT	27361	4	RecName: Full=NADH dehydrogenase [ubiquinone] flavoprotein 2
	D3ZIL6_RAT	31759	3	SubName: Full=Enoyl Coenzyme A hydratase domain containing 2 (Predicted)
	ESTD_RAT	31343	3	RecName: Full=S-formylglutathione hydrolase; Short=FGH; EC=3.1.2.12; AltName: Full=Esterase D OS=Rattus norvegicus (Rat)
	Q8CJG5_RAT	48582	3	SubName: Full=Gene {ECO:0000313|EMBL:BAC11910.1} OS=Rattus norvegicus (Rat)
	B5DF65_RAT	22080	4	SubName: Full=Biliverdin reductase B (Flavin reductase (NADPH)) {ECO:0000313|EMBL:AAI68943.1}; SubName: Full=Biliverdin reductase B (Flavin reductase (NADPH)) (Predicted)
	TCPA_RAT	60322	5	RecName: Full=T-complex protein 1 subunit alpha; Short=TCP-1-alpha; AltName: Full=CCT-alpha OS=Rattus norvegicus (Rat)
	TTHY_RAT	15710	6	RecName: Full=Transthyretin; AltName: Full=Prealbumin; AltName: Full=TBPA; Flags: Precursor OS=Rattus norvegicus (Rat)
	ARF1_RAT	20684	5	RecName: Full=ADP-ribosylation factor 1 OS=Rattus norvegicus (Rat)
	G3V6S3_RAT	37041	4	SubName: Full=Calumenin {ECO:0000313|Ensembl:ENSRNOP00000008356}; SubName: Full=RCG28015
	M0RDM4_RAT	14060	4	RecName: Full=Histone H2A {ECO:0000256|RuleBase:RU000527} OS=Rattus norvegicus (Rat)
	MCAT_RAT	33132	8	RecName: Full=Mitochondrial carnitine/acylcarnitine carrier protein; AltName: Full=Carnitine/acylcarnitine translocase; Short=CAC; AltName: Full=Solute carrier family 25 member 20 OS=Rattus norvegicus (Rat)
	Q5PQU1_RAT	47734	5	SubName: Full=Kininogen 1 {ECO:0000313|EMBL:AAH87028.1} OS=Rattus norvegicus (Rat)
	AATC_RAT	46400	6	RecName: Full=Aspartate aminotransferase
	CDC42_RAT	21245	5	RecName: Full=Cell division control protein 42 homolog; Flags: Precursor OS=Rattus norvegicus (Rat)
	TMED7_RAT	25463	6	RecName: Full=Transmembrane emp24 domain-containing protein 7; AltName: Full=p24 family protein gamma-3; Short=p24gamma3; AltName: Full=p27; Flags: Precursor OS=Rattus norvegicus (Rat)
	GBB1_RAT	37353	6	RecName: Full=Guanine nucleotide-binding protein G(I)/G(S)/G(T) subunit beta-1; AltName: Full=Transducin beta chain 1 OS=Rattus norvegicus (Rat)
	HUTH_RAT	72238	4	RecName: Full=Histidine ammonia-lyase; Short=Histidase; EC=4.3.1.3 OS=Rattus norvegicus (Rat)
	RL30_RAT	12776	4	RecName: Full=60S ribosomal protein L30 OS=Rattus norvegicus (Rat)
	F1LRJ9_RAT	52367	10	SubName: Full=Uncharacterized protein {ECO:0000313|Ensembl:ENSRNOP00000064790}; Flags: Fragment OS=Rattus norvegicus (Rat)
	Q5I0N0_RAT	45634	10	SubName: Full=Arylacetamide deacetylase (Esterase) {ECO:0000313|EMBL:AAH88143.1}; SubName: Full=Arylacetamide deacetylase (Esterase)
	D3Z8I7_RAT	23366	3	SubName: Full=Protein Gstt3 {ECO:0000313|Ensembl:ENSRNOP00000055038}; SubName: Full=Similar to Glutathione S-transferase
	UP2_RAT	11060	2	RecName: Full=Urinary protein 2; Short=UP-2; Short=rUP-2; Flags: Precursor OS=Rattus norvegicus (Rat)
	D4A0T0_RAT	20845	7	SubName: Full=Protein Ndufb10 {ECO:0000313|Ensembl:ENSRNOP00000019624}; SubName: Full=RCG32945 {ECO:0000313|EMBL:EDM03875.1} OS=Rattus norvegicus (Rat)
	D3ZRN3_RAT	41936	4	SubName: Full=Protein Actbl2 {ECO:0000313|Ensembl:ENSRNOP00000059847}; SubName: Full=Similar to cytoplasmic beta-actin (Predicted) {ECO:0000313|EMBL:EDM10336.1} OS=Rattus norvegicus (Rat)
	B2RYT7_RAT	27776	2	SubName: Full=Haloacid dehalogenase-like hydrolase domain containing 3 {ECO:0000313|EMBL:AAI66898.1}; SubName: Full=Protein Hdhd3 {ECO:0000313|Ensembl:ENSRNOP00000020380}; SubName: Full=RCG55172 {ECO:0000313|EMBL:EDM10554.1} OS=Rattus norvegicus (Ra
	ERG7_RAT	83247	6	RecName: Full=Lanosterol synthase; EC=5.4.99.7; AltName: Full=2
	Q68FZ8_RAT	58641	6	SubName: Full=Propionyl coenzyme A carboxylase
	D4A786_RAT	6377	4	SubName: Full=Protein LOC100360002 {ECO:0000313|Ensembl:ENSRNOP00000061817} OS=Rattus norvegicus (Rat)
	PRDX1_RAT	22095	9	RecName: Full=Peroxiredoxin-1; EC=1.11.1.15; AltName: Full=HBP23; AltName: Full=Heme-binding 23 kDa protein; AltName: Full=Thioredoxin peroxidase 2; AltName: Full=Thioredoxin-dependent peroxide reductase 2 OS=Rattus norvegicus (Rat)
	TPM3_RAT	28989	5	RecName: Full=Tropomyosin alpha-3 chain; AltName: Full=Gamma-tropomyosin; AltName: Full=Tropomyosin-3; AltName: Full=Tropomyosin-5 OS=Rattus norvegicus (Rat)
	B0BNJ4_RAT	27659	3	SubName: Full=Ethylmalonic encephalopathy 1 {ECO:0000313|EMBL:AAI58849.1}; SubName: Full=Ethylmalonic encephalopathy 1 (Predicted) {ECO:0000313|EMBL:EDM08081.1}; SubName: Full=Protein Ethe1 {ECO:0000313|Ensembl:ENSRNOP00000027076} OS=Rattus norvegic
	F1LTW8_RAT	15811	3	SubName: Full=Protein RGD1563705 {ECO:0000313|Ensembl:ENSRNOP00000050533} OS=Rattus norvegicus (Rat)
	ENPP1_RAT	102876	6	RecName: Full=Ectonucleotide pyrophosphatase/phosphodiesterase family member 1; Short=E-NPP 1; AltName: Full=Phosphodiesterase I/nucleotide pyrophosphatase 1; AltName: Full=Plasma-cell membrane glycoprotein PC-1; Includes: RecName: Full=Alkaline pho
	NLTP_RAT	58775	7	RecName: Full=Non-specific lipid-transfer protein; Short=NSL-TP; EC=2.3.1.176; AltName: Full=Propanoyl-CoA C-acyltransferase; AltName: Full=SCP-chi; AltName: Full=SCPX; AltName: Full=Sterol carrier protein 2; Short=SCP-2; AltName: Full=Sterol carrie
	TCPG_RAT	60608	7	RecName: Full=T-complex protein 1 subunit gamma; Short=TCP-1-gamma; AltName: Full=CCT-gamma OS=Rattus norvegicus (Rat)
	CP255_RAT	55954	4	RecName: Full=Cytochrome P450 2C55; EC=1.14.14.1; AltName: Full=CYPIIC24; AltName: Full=CYPIIC55; AltName: Full=Cytochrome P450 2C24; AltName: Full=Cytochrome P450-PROS2 OS=Rattus norvegicus (Rat)
	ATP5J_RAT	12487	3	RecName: Full=ATP synthase-coupling factor 6
	F1LPL7_RAT	35655	4	SubName: Full=Protein LOC100912427 {ECO:0000313|Ensembl:ENSRNOP00000055494} OS=Rattus norvegicus (Rat)
	GSTA2_RAT	25543	7	RecName: Full=Glutathione S-transferase alpha-2; EC=2.5.1.18; AltName: Full=GST 1b-1b; AltName: Full=GST A2-2; AltName: Full=Glutathione S-transferase Ya-2; Short=GST Ya2 OS=Rattus norvegicus (Rat)
	FETUB_RAT	41536	4	RecName: Full=Fetuin-B; AltName: Full=Fetuin-like protein IRL685; Flags: Precursor OS=Rattus norvegicus (Rat)
	UP3_RAT	11092	2	RecName: Full=Urinary protein 3; Short=UP-3; Short=rUP-3; Flags: Precursor OS=Rattus norvegicus (Rat)
	H4_RAT	11360	4	RecName: Full=Histone H4; Contains: RecName: Full=Osteogenic growth peptide; Short=OGP OS=Rattus norvegicus (Rat)
	MVP_RAT	95739	8	RecName: Full=Major vault protein; Short=MVP OS=Rattus norvegicus (Rat)
	Q5XI86_RAT	19517	4	SubName: Full=Peptidyl-tRNA hydrolase 2 {ECO:0000313|EMBL:AAH83801.1}; SubName: Full=Protein Ptrh2 {ECO:0000313|Ensembl:ENSRNOP00000005661}; SubName: Full=Similar to A230072I16Rik protein
	F1LX07_RAT	74181	7	SubName: Full=Protein Slc25a12 {ECO:0000313|Ensembl:ENSRNOP00000032909}; Flags: Fragment OS=Rattus norvegicus (Rat)
	Q6AZ25_RAT	28679	5	SubName: Full=Tropomyosin 1
	DJB11_RAT	40470	4	RecName: Full=DnaJ homolog subfamily B member 11; AltName: Full=ER-associated DNAJ; AltName: Full=ER-associated Hsp40 co-chaperone; AltName: Full=Endoplasmic reticulum DNA J domain-containing protein 3; Short=ER-resident protein ERdj3; Short=ERdj3;
	F1M8L5_RAT	69187	6	SubName: Full=Propionyl-CoA carboxylase alpha chain
	NDUAB_RAT	14844	4	RecName: Full=NADH dehydrogenase [ubiquinone] 1 alpha subcomplex subunit 11; AltName: Full=Complex I-B14.7; Short=CI-B14.7; AltName: Full=NADH-ubiquinone oxidoreductase subunit B14.7 OS=Rattus norvegicus (Rat)
	F1LQ09_RAT	66153	2	SubName: Full=Protein Atl2 {ECO:0000313|Ensembl:ENSRNOP00000008988} OS=Rattus norvegicus (Rat)
	REEP6_RAT	23298	3	RecName: Full=Receptor expression-enhancing protein 6; AltName: Full=Polyposis locus protein 1-like 1 OS=Rattus norvegicus (Rat)
	CH10_RAT	10895	3	RecName: Full=10 kDa heat shock protein
	G3V6C2_RAT	49858	5	SubName: Full=Protein Hgd {ECO:0000313|Ensembl:ENSRNOP00000003645}; SubName: Full=RCG52860
	ACNT2_RAT	45981	4	RecName: Full=Acyl-coenzyme A amino acid N-acyltransferase 2 {ECO:0000250|UniProtKB:Q8BGG9}; EC=2.3.1.- OS=Rattus norvegicus (Rat)
	FIBG_RAT	50600	6	RecName: Full=Fibrinogen gamma chain; Flags: Precursor OS=Rattus norvegicus (Rat)
	FIBB_RAT	54201	4	RecName: Full=Fibrinogen beta chain; AltName: Full=Liver regeneration-related protein LRRG036/LRRG043/LRRG189; Contains: RecName: Full=Fibrinopeptide B; Contains: RecName: Full=Fibrinogen beta chain; Flags: Precursor OS=Rattus norvegicus (Rat)
	COX5B_RAT	13906	4	RecName: Full=Cytochrome c oxidase subunit 5B
	FADS2_RAT	52347	8	RecName: Full=Fatty acid desaturase 2; EC=1.14.19.-; AltName: Full=Delta(6) fatty acid desaturase; Short=D6D; Short=Delta(6) desaturase; Short=Delta-6 desaturase OS=Rattus norvegicus (Rat)
	PNPH_RAT	32281	4	RecName: Full=Purine nucleoside phosphorylase {ECO:0000250|UniProtKB:P00491}; Short=PNP {ECO:0000250|UniProtKB:P00491}; EC=2.4.2.1; AltName: Full=Inosine phosphorylase {ECO:0000250|UniProtKB:P00491}; AltName: Full=Inosine-guanosine phosphorylase OS=
	MARC2_RAT	38224	5	RecName: Full=Mitochondrial amidoxime reducing component 2; Short=mARC2; EC=1.-.-.-; AltName: Full=Molybdenum cofactor sulfurase C-terminal domain-containing protein 2; Short=MOSC domain-containing protein 2; Short=Moco sulfurase C-terminal domain-c
	FA65B_RAT	144619	4	RecName: Full=Protein FAM65B OS=Rattus norvegicus (Rat)
	FPPS_RAT	40804	5	RecName: Full=Farnesyl pyrophosphate synthase; Short=FPP synthase; Short=FPS; EC=2.5.1.10; AltName: Full=(2E
	G3V6T1_RAT	138272	7	RecName: Full=Coatomer subunit alpha {ECO:0000256|PIRNR:PIRNR003354} OS=Rattus norvegicus (Rat)
	NAKD2_RAT	48087	5	RecName: Full=NAD kinase 2
	SGPL1_RAT	63717	2	RecName: Full=Sphingosine-1-phosphate lyase 1; Short=S1PL; Short=SP-lyase 1; Short=SPL; Short=SPL 1; EC=4.1.2.27; AltName: Full=Sphingosine-1-phosphate aldolase OS=Rattus norvegicus (Rat)
	D3ZD09_RAT	10065	4	SubName: Full=Cytochrome c oxidase subunit 6B1 {ECO:0000313|Ensembl:ENSRNOP00000048723} OS=Rattus norvegicus (Rat)
	D3ZUU8_RAT	46988	3	SubName: Full=Protein Sec14l4 {ECO:0000313|Ensembl:ENSRNOP00000006053}; SubName: Full=Similar to SEC14 (S. cerevisiae)-like 2 (Predicted)
	ESYT1_RAT	121084	4	RecName: Full=Extended synaptotagmin-1; Short=E-Syt1; AltName: Full=Membrane-bound C2 domain-containing protein; AltName: Full=vp115 OS=Rattus norvegicus (Rat)
	MRP2_RAT	173274	6	RecName: Full=Canalicular multispecific organic anion transporter 1; AltName: Full=ATP-binding cassette sub-family C member 2; AltName: Full=Canalicular multidrug resistance protein; AltName: Full=Multidrug resistance-associated protein 2 OS=Rattus
	Q6IRK4_RAT	46194	4	SubName: Full=Protein Slc37a4 {ECO:0000313|Ensembl:ENSRNOP00000015810}; SubName: Full=Solute carrier family 37 (Glucose-6-phosphate transporter)
	G3V6K6_RAT	134809	4	RecName: Full=Receptor protein-tyrosine kinase {ECO:0000256|SAAS:SAAS00067536}; EC=2.7.10.1 {ECO:0000256|SAAS:SAAS00067536} OS=Rattus norvegicus (Rat)
	D3ZZR9_RAT	15378	4	RecName: Full=Peptidyl-prolyl cis-trans isomerase {ECO:0000256|RuleBase:RU004231} OS=Rattus norvegicus (Rat)
	D4A6G6_RAT	16108	5	SubName: Full=Protein LOC100362339 {ECO:0000313|Ensembl:ENSRNOP00000061442} OS=Rattus norvegicus (Rat)
	G3V6S5_RAT	100902	8	SubName: Full=C-1-tetrahydrofolate synthase
	SODC_RAT	15902	2	RecName: Full=Superoxide dismutase [Cu-Zn]; EC=1.15.1.1 OS=Rattus norvegicus (Rat)
	M0R9I8_RAT	14491	5	RecName: Full=40S ribosomal protein S12 {ECO:0000256|RuleBase:RU000670} OS=Rattus norvegicus (Rat)
	D3ZDW1_RAT	78488	4	SubName: Full=Protein Uroc1 {ECO:0000313|Ensembl:ENSRNOP00000024295} OS=Rattus norvegicus (Rat)
	CREL1_RAT	45666	2	RecName: Full=Cysteine-rich with EGF-like domain protein 1; Flags: Precursor OS=Rattus norvegicus (Rat)
	E9PSX3_RAT	40530	4	SubName: Full=Protein RT1-A2 {ECO:0000313|Ensembl:ENSRNOP00000037728} OS=Rattus norvegicus (Rat)
	UK114_RAT	14295	3	RecName: Full=Ribonuclease UK114; EC=3.1.-.-; AltName: Full=14.5 kDa translational inhibitor protein; AltName: Full=Perchloric acid soluble protein OS=Rattus norvegicus (Rat)
	D3ZJX5_RAT	39830	5	SubName: Full=Protein LOC687295 {ECO:0000313|Ensembl:ENSRNOP00000053926}; SubName: Full=RCG54610
	TRAP1_RAT	80411	4	RecName: Full=Heat shock protein 75 kDa
	D4A994_RAT	111115	8	SubName: Full=Protein Emc1 {ECO:0000313|Ensembl:ENSRNOP00000061588}; SubName: Full=Similar to KIAA0090 protein (Predicted)
	PABP1_RAT	70656	4	RecName: Full=Polyadenylate-binding protein 1; Short=PABP-1; Short=Poly(A)-binding protein 1 OS=Rattus norvegicus (Rat)
	EMC8_RAT	23390	2	RecName: Full=ER membrane protein complex subunit 8; AltName: Full=Neighbor of COX4 OS=Rattus norvegicus (Rat)
	RL5_RAT	34437	4	RecName: Full=60S ribosomal protein L5 OS=Rattus norvegicus (Rat)
	SSRD_RAT	18968	3	RecName: Full=Translocon-associated protein subunit delta; Short=TRAP-delta; AltName: Full=Signal sequence receptor subunit delta; Short=SSR-delta; Flags: Precursor OS=Rattus norvegicus (Rat)
	ALKMO_RAT	51665	5	RecName: Full=Alkylglycerol monooxygenase; EC=1.14.16.5; AltName: Full=Transmembrane protein 195 OS=Rattus norvegicus (Rat)
	DHAK_RAT	59406	3	RecName: Full=Bifunctional ATP-dependent dihydroxyacetone kinase/FAD-AMP lyase (cyclizing); Includes: RecName: Full=ATP-dependent dihydroxyacetone kinase; Short=DHA kinase; EC=2.7.1.28; EC=2.7.1.29; AltName: Full=Glycerone kinase; AltName: Full=Trio
	Q5M7X1_RAT	102396	4	SubName: Full=Coatomer protein complex
	AMRP_RAT	42006	7	RecName: Full=Alpha-2-macroglobulin receptor-associated protein; Short=Alpha-2-MRAP; AltName: Full=Gp330-binding 45 kDa protein; AltName: Full=Low density lipoprotein receptor-related protein-associated protein 1; Short=RAP; Flags: Precursor OS=Ratt
	Q9JKB7_RAT	50869	5	SubName: Full=Guanine deaminase {ECO:0000313|EMBL:AAF63337.1
	G3V9D3_RAT	88468	4	SubName: Full=Protein sel-1 homolog 1 {ECO:0000313|Ensembl:ENSRNOP00000043232}; SubName: Full=Sel1 (Suppressor of lin-12) 1 homolog (C. elegans)
	Q4KLN2_RAT	49711	3	SubName: Full=Mtx1 protein {ECO:0000313|EMBL:AAH99090.1}; Flags: Fragment OS=Rattus norvegicus (Rat)
	E9PSZ7_RAT	56076	5	SubName: Full=Protein Cyp2t1 {ECO:0000313|Ensembl:ENSRNOP00000061482} OS=Rattus norvegicus (Rat)
	CMBL_RAT	27885	3	RecName: Full=Carboxymethylenebutenolidase homolog; EC=3.1.-.-; AltName: Full=Liver regeneration-related protein LRRG072 OS=Rattus norvegicus (Rat)
	ECI2_RAT	42994	4	RecName: Full=Enoyl-CoA delta isomerase 2
	APOE_RAT	35731	4	RecName: Full=Apolipoprotein E; Short=Apo-E; Flags: Precursor OS=Rattus norvegicus (Rat)
	GCKR_RAT	68874	5	RecName: Full=Glucokinase regulatory protein; Short=Glucokinase regulator OS=Rattus norvegicus (Rat)
	IF2A_RAT	36085	4	RecName: Full=Eukaryotic translation initiation factor 2 subunit 1; AltName: Full=Eukaryotic translation initiation factor 2 subunit alpha; Short=eIF-2-alpha; Short=eIF-2A; Short=eIF-2alpha OS=Rattus norvegicus (Rat)
	Q3KR94_RAT	54690	5	SubName: Full=Protein Vtn {ECO:0000313|Ensembl:ENSRNOP00000046415}; SubName: Full=Vitronectin {ECO:0000313|EMBL:AAI05822.1}; SubName: Full=Vitronectin
	F1LT36_RAT	18881	4	SubName: Full=Protein RGD1564698 {ECO:0000313|Ensembl:ENSRNOP00000046992} OS=Rattus norvegicus (Rat)
	ARF5_RAT	20517	4	RecName: Full=ADP-ribosylation factor 5 OS=Rattus norvegicus (Rat)
	RMD2_RAT	47187	4	RecName: Full=Regulator of microtubule dynamics protein 2; Short=RMD-2; AltName: Full=Protein FAM82A1 OS=Rattus norvegicus (Rat)
	THRB_RAT	70367	6	RecName: Full=Prothrombin; EC=3.4.21.5; AltName: Full=Coagulation factor II; Contains: RecName: Full=Activation peptide fragment 1; Contains: RecName: Full=Activation peptide fragment 2; Contains: RecName: Full=Thrombin light chain; Contains: RecNam
	F213A_RAT	25746	3	RecName: Full=Redox-regulatory protein FAM213A; AltName: Full=Peroxiredoxin-like 2 activated in M-CSF stimulated monocytes; Short=Protein PAMM; AltName: Full=Sperm head protein 1 OS=Rattus norvegicus (Rat)
	SARDH_RAT	101376	6	RecName: Full=Sarcosine dehydrogenase
	D4A147_RAT	51379	4	SubName: Full=Protein Ugt2a3 {ECO:0000313|Ensembl:ENSRNOP00000002705} OS=Rattus norvegicus (Rat)
	B6DTP5_RAT	69069	4	SubName: Full=DEAD (Asp-Glu-Ala-Asp) box polypeptide 5 {ECO:0000313|EMBL:ACI04543.1}; Flags: Fragment OS=Rattus norvegicus (Rat)
	LYRIC_RAT	63931	3	RecName: Full=Protein LYRIC; AltName: Full=Lysine-rich CEACAM1 co-isolated protein; AltName: Full=Metadherin; AltName: Full=Metastasis adhesion protein OS=Rattus norvegicus (Rat)
	Q5M884_RAT	33665	4	SubName: Full=Protein Eci3 {ECO:0000313|Ensembl:ENSRNOP00000050206}; SubName: Full=Uncharacterized protein {ECO:0000313|EMBL:AAH88178.1} OS=Rattus norvegicus (Rat)
	NDUS4_RAT	19728	4	RecName: Full=NADH dehydrogenase [ubiquinone] iron-sulfur protein 4
	MLEC_RAT	32398	5	RecName: Full=Malectin; Flags: Precursor OS=Rattus norvegicus (Rat)
	RS9_RAT	22578	9	RecName: Full=40S ribosomal protein S9 OS=Rattus norvegicus (Rat)
	ARLY_RAT	51517	6	RecName: Full=Argininosuccinate lyase; Short=ASAL; EC=4.3.2.1; AltName: Full=Arginosuccinase OS=Rattus norvegicus (Rat)
	CISD1_RAT	12089	3	RecName: Full=CDGSH iron-sulfur domain-containing protein 1; AltName: Full=MitoNEET OS=Rattus norvegicus (Rat)
	MDHC_RAT	36460	5	RecName: Full=Malate dehydrogenase
	SODM_RAT	24659	4	RecName: Full=Superoxide dismutase [Mn]
	D4ACV3_RAT	13980	4	RecName: Full=Histone H2A {ECO:0000256|RuleBase:RU000527} OS=Rattus norvegicus (Rat)
	GDIB_RAT	50505	5	RecName: Full=Rab GDP dissociation inhibitor beta; Short=Rab GDI beta; AltName: Full=GDI-3; AltName: Full=Guanosine diphosphate dissociation inhibitor 2; Short=GDI-2 OS=Rattus norvegicus (Rat)
	SNAA_RAT	33171	4	RecName: Full=Alpha-soluble NSF attachment protein; Short=SNAP-alpha; AltName: Full=N-ethylmaleimide-sensitive factor attachment protein alpha OS=Rattus norvegicus (Rat)
	B2MG_RAT	13711	3	RecName: Full=Beta-2-microglobulin; Flags: Precursor OS=Rattus norvegicus (Rat)
	NUCB1_RAT	53474	5	RecName: Full=Nucleobindin-1; AltName: Full=Bone 63 kDa calcium-binding protein; AltName: Full=CALNUC; Flags: Precursor OS=Rattus norvegicus (Rat)
	D3ZNZ5_RAT	52727	3	SubName: Full=Protein Ero1lb {ECO:0000313|Ensembl:ENSRNOP00000003526} OS=Rattus norvegicus (Rat)
	Q5RK10_RAT	23431	5	SubName: Full=60S ribosomal protein L13a {ECO:0000313|Ensembl:ENSRNOP00000027976}; SubName: Full=Neuroprotective protein 11 {ECO:0000313|EMBL:ABY47887.1}; SubName: Full=RCG53885
	DLDH_RAT	54004	5	RecName: Full=Dihydrolipoyl dehydrogenase
	PA2G4_RAT	43629	6	RecName: Full=Proliferation-associated protein 2G4 OS=Rattus norvegicus (Rat)
	A1AT_RAT	46107	4	RecName: Full=Alpha-1-antiproteinase; AltName: Full=Alpha-1-antitrypsin; AltName: Full=Alpha-1-proteinase inhibitor; AltName: Full=Serpin A1; Flags: Precursor OS=Rattus norvegicus (Rat)
	Q6TXI6_RAT	31337	2	SubName: Full=LRRGT00013 {ECO:0000313|EMBL:AAQ96226.1}; SubName: Full=Protein LOC317456 {ECO:0000313|Ensembl:ENSRNOP00000005153} OS=Rattus norvegicus (Rat)
	M0RBX9_RAT	136070	8	SubName: Full=Protein Mia3 {ECO:0000313|Ensembl:ENSRNOP00000067079}; Flags: Fragment OS=Rattus norvegicus (Rat)
	XYLB_RAT	57933	2	RecName: Full=Xylulose kinase; Short=Xylulokinase; EC=2.7.1.17 OS=Rattus norvegicus (Rat)
	TMED2_RAT	22718	3	RecName: Full=Transmembrane emp24 domain-containing protein 2; AltName: Full=COPI-coated vesicle membrane protein p24; AltName: Full=Membrane protein p24A; AltName: Full=RNP21.4; AltName: Full=p24 family protein beta-1; Short=p24beta1; Flags: Precur
	F1LZC5_RAT	17037	3	SubName: Full=Protein Ndufa13 {ECO:0000313|Ensembl:ENSRNOP00000034694}; Flags: Fragment OS=Rattus norvegicus (Rat)
	Q2MHD8_RAT	34546	5	SubName: Full=Truncated form of 17beta-hydroxysteroid dehydrogenase {ECO:0000313|EMBL:BAE75958.1} OS=Rattus norvegicus (Rat)
	F1LU48_RAT	32396	2	SubName: Full=Protein Ergic1 {ECO:0000313|Ensembl:ENSRNOP00000005273}; Flags: Fragment OS=Rattus norvegicus (Rat)
	A1KXF7_RAT	46744	3	SubName: Full=TID-1 short isoform {ECO:0000313|EMBL:AAP88584.1} OS=Rattus norvegicus (Rat)
	Q3MHS9_RAT	57981	4	SubName: Full=Chaperonin containing Tcp1
	HMGCL_RAT	34170	3	RecName: Full=Hydroxymethylglutaryl-CoA lyase
	MSMO1_RAT	34941	4	RecName: Full=Methylsterol monooxygenase 1; EC=1.14.13.72; AltName: Full=C-4 methylsterol oxidase; AltName: Full=Neuropep 1; AltName: Full=RANP-1 OS=Rattus norvegicus (Rat)
	Q7TP05_RAT	123960	2	SubName: Full=Da1-24 {ECO:0000313|EMBL:AAP92654.1}; SubName: Full=Protein C2 {ECO:0000313|Ensembl:ENSRNOP00000059051} OS=Rattus norvegicus (Rat)
	FADS1_RAT	52448	5	RecName: Full=Fatty acid desaturase 1; EC=1.14.19.-; AltName: Full=Delta(5) fatty acid desaturase; Short=D5D; Short=Delta(5) desaturase; Short=Delta-5 desaturase OS=Rattus norvegicus (Rat)
	Q4V8I6_RAT	19012	5	SubName: Full=Ribosomal protein L11 {ECO:0000313|EMBL:AAH97372.1} OS=Rattus norvegicus (Rat)
	D4AE56_RAT	43424	2	SubName: Full=Prostaglandin E synthase 2 (Predicted)
	B5DEM5_RAT	23765	4	SubName: Full=RCG25732
	B0BNM7_RAT	30725	1	SubName: Full=Sco1 protein {ECO:0000313|EMBL:AAI58883.1}; Flags: Fragment OS=Rattus norvegicus (Rat)
	AADAT_RAT	47754	3	RecName: Full=Kynurenine/alpha-aminoadipate aminotransferase
	ST1B1_RAT	34813	5	RecName: Full=Sulfotransferase family cytosolic 1B member 1; Short=ST1B1; Short=Sulfotransferase 1B1; EC=2.8.2.-; AltName: Full=DOPA/tyrosine sulfotransferase OS=Rattus norvegicus (Rat)
	C4BPA_RAT	62225	2	RecName: Full=C4b-binding protein alpha chain; Short=C4bp; Flags: Precursor OS=Rattus norvegicus (Rat)
	D3ZEN5_RAT	16915	3	SubName: Full=Peroxiredoxin-5
	RL10A_RAT	24816	6	RecName: Full=60S ribosomal protein L10a OS=Rattus norvegicus (Rat)
	IVD_RAT	46406	5	RecName: Full=Isovaleryl-CoA dehydrogenase
	ACBP_RAT	10021	3	RecName: Full=Acyl-CoA-binding protein; Short=ACBP; AltName: Full=Diazepam-binding inhibitor; Short=DBI; AltName: Full=Endozepine; Short=EP; Contains: RecName: Full=Triakontatetraneuropeptide; Short=TTN; Contains: RecName: Full=Octadecaneuropeptide;
	ECI1_RAT	32234	4	RecName: Full=Enoyl-CoA delta isomerase 1
	TXTP_RAT	33814	6	RecName: Full=Tricarboxylate transport protein
	Q6P3V8_RAT	46125	3	SubName: Full=Eukaryotic translation initiation factor 4A1 {ECO:0000313|EMBL:AAH63812.1}; SubName: Full=Eukaryotic translation initiation factor 4A1
	ERP29_RAT	28557	5	RecName: Full=Endoplasmic reticulum resident protein 29; Short=ERp29; AltName: Full=Endoplasmic reticulum resident protein 31; Short=ERp31; Flags: Precursor OS=Rattus norvegicus (Rat)
	QCR6_RAT	10417	1	RecName: Full=Cytochrome b-c1 complex subunit 6
	NDKB_RAT	17272	4	RecName: Full=Nucleoside diphosphate kinase B; Short=NDK B; Short=NDP kinase B; EC=2.7.4.6; AltName: Full=Histidine protein kinase NDKB; EC=2.7.13.3; AltName: Full=P18 OS=Rattus norvegicus (Rat)
	ROA2_RAT	37455	3	RecName: Full=Heterogeneous nuclear ribonucleoproteins A2/B1 {ECO:0000312|EMBL:BAF79676.1}; Short=hnRNP A2/B1 OS=Rattus norvegicus (Rat)
	GNAI2_RAT	40473	3	RecName: Full=Guanine nucleotide-binding protein G(i) subunit alpha-2; AltName: Full=Adenylate cyclase-inhibiting G alpha protein OS=Rattus norvegicus (Rat)
	D3ZFA8_RAT	15458	3	SubName: Full=Protein LOC100362366 {ECO:0000313|Ensembl:ENSRNOP00000031121} OS=Rattus norvegicus (Rat)
	G3V9A6_RAT	25140	1	SubName: Full=Lysoplasmalogenase {ECO:0000313|Ensembl:ENSRNOP00000040879}; SubName: Full=RCG22704 {ECO:0000313|EMBL:EDL75844.1} OS=Rattus norvegicus (Rat)
	M3ZCQ0_RAT	33099	4	RecName: Full=Sulfotransferase {ECO:0000256|RuleBase:RU361155}; EC=2.8.2.- {ECO:0000256|RuleBase:RU361155} OS=Rattus norvegicus (Rat)
	AUP1_RAT	46170	2	RecName: Full=Ancient ubiquitous protein 1 OS=Rattus norvegicus (Rat)
	TMM33_RAT	27965	4	RecName: Full=Transmembrane protein 33; AltName: Full=Protein DB83 OS=Rattus norvegicus (Rat)
	Q6TXG7_RAT	75326	3	RecName: Full=Serine hydroxymethyltransferase {ECO:0000256|RuleBase:RU000585}; EC=2.1.2.1 {ECO:0000256|RuleBase:RU000585} OS=Rattus norvegicus (Rat)
	DDC_RAT	54018	2	RecName: Full=Aromatic-L-amino-acid decarboxylase; Short=AADC; EC=4.1.1.28; AltName: Full=DOPA decarboxylase; Short=DDC OS=Rattus norvegicus (Rat)
	B0BMW0_RAT	23882	5	SubName: Full=RAB14
	AK1A1_RAT	36483	5	RecName: Full=Alcohol dehydrogenase [NADP(+)]; EC=1.1.1.2; AltName: Full=3-DG-reducing enzyme; AltName: Full=Aldehyde reductase; AltName: Full=Aldo-keto reductase family 1 member A1 OS=Rattus norvegicus (Rat)
	STEA4_RAT	52731	3	RecName: Full=Metalloreductase STEAP4; EC=1.16.1.-; AltName: Full=Six-transmembrane epithelial antigen of prostate 4 OS=Rattus norvegicus (Rat)
	KAD4_RAT	25187	4	RecName: Full=Adenylate kinase 4
	DHPR_RAT	25536	4	RecName: Full=Dihydropteridine reductase; EC=1.5.1.34; AltName: Full=HDHPR; AltName: Full=Quinoid dihydropteridine reductase OS=Rattus norvegicus (Rat)
	CAND1_RAT	136275	3	RecName: Full=Cullin-associated NEDD8-dissociated protein 1; AltName: Full=Cullin-associated and neddylation-dissociated protein 1; AltName: Full=TBP-interacting protein of 120 kDa A; Short=TBP-interacting protein 120A; AltName: Full=p120 CAND1 OS=R
	DHCR7_RAT	54119	7	RecName: Full=7-dehydrocholesterol reductase; Short=7-DHC reductase; EC=1.3.1.21; AltName: Full=Sterol Delta(7)-reductase OS=Rattus norvegicus (Rat)
	TTPA_RAT	31826	4	RecName: Full=Alpha-tocopherol transfer protein; Short=Alpha-TTP OS=Rattus norvegicus (Rat)
	CCD47_RAT	55697	4	RecName: Full=Coiled-coil domain-containing protein 47; Flags: Precursor OS=Rattus norvegicus (Rat)
	B1H271_RAT	35164	2	SubName: Full=Slc25a42 protein {ECO:0000313|EMBL:AAI60887.1} OS=Rattus norvegicus (Rat)
	Q5PQZ9_RAT	14349	4	RecName: Full=NADH dehydrogenase [ubiquinone] 1 subunit C2 {ECO:0000256|PIRNR:PIRNR017834} OS=Rattus norvegicus (Rat)
	ACD11_RAT	87316	6	RecName: Full=Acyl-CoA dehydrogenase family member 11; Short=ACAD-11; EC=1.3.99.- OS=Rattus norvegicus (Rat)
	MANF_RAT	20375	4	RecName: Full=Mesencephalic astrocyte-derived neurotrophic factor; AltName: Full=Arginine-rich protein; AltName: Full=Protein ARMET; Flags: Precursor OS=Rattus norvegicus (Rat)
	F1M9K9_RAT	120343	4	RecName: Full=6-phosphogluconate dehydrogenase
	Q5XIM0_RAT	47363	4	SubName: Full=BCS1-like (Yeast) {ECO:0000313|EMBL:AAH83660.1}; SubName: Full=BCS1-like (Yeast)
	B2RYF6_RAT	75229	2	SubName: Full=Cleft lip and palate associated transmembrane protein 1 {ECO:0000313|EMBL:AAI66760.1}; SubName: Full=Cleft lip and palate associated transmembrane protein 1 (Predicted) {ECO:0000313|EMBL:EDM08175.1}; SubName: Full=Protein Clptm1 {ECO:0
	PSMD2_RAT	100124	5	RecName: Full=26S proteasome non-ATPase regulatory subunit 2 OS=Rattus norvegicus (Rat)
	SSRG_RAT	21051	1	RecName: Full=Translocon-associated protein subunit gamma; Short=TRAP-gamma; AltName: Full=Signal sequence receptor subunit gamma; Short=SSR-gamma OS=Rattus norvegicus (Rat)
	D4ACB8_RAT	59550	3	SubName: Full=Chaperonin subunit 8 (Theta) (Predicted)
	D4A3V2_RAT	15214	3	RecName: Full=NADH dehydrogenase [ubiquinone] 1 alpha subcomplex subunit 6 {ECO:0000256|PIRNR:PIRNR006643} OS=Rattus norvegicus (Rat)
	HRG_RAT	59012	3	RecName: Full=Histidine-rich glycoprotein; AltName: Full=Histidine-proline-rich glycoprotein; Short=HPRG; AltName: Full=Histidine-rich glycoprotein 1; Short=HRG1; Flags: Precursor OS=Rattus norvegicus (Rat)
	Q499V7_RAT	46500	5	RecName: Full=Succinyl-CoA ligase subunit beta {ECO:0000256|RuleBase:RU361258}; EC=6.2.1.- {ECO:0000256|RuleBase:RU361258}; Flags: Fragment OS=Rattus norvegicus (Rat)
	D3ZD31_RAT	165752	5	SubName: Full=Mannose receptor
	D3ZJZ0_RAT	21171	3	SubName: Full=Protein Tmem205 {ECO:0000313|Ensembl:ENSRNOP00000015684}; SubName: Full=RGD1563250 (Predicted)
	D3ZEG8_RAT	29854	2	SubName: Full=Protein RGD1309188 {ECO:0000313|Ensembl:ENSRNOP00000012270}; SubName: Full=Putative uncharacterized protein RGD1309188_predicted {ECO:0000313|EMBL:EDL78280.1} OS=Rattus norvegicus (Rat)
	CYC_RAT	11598	4	RecName: Full=Cytochrome c
	ITIH3_RAT	99036	4	RecName: Full=Inter-alpha-trypsin inhibitor heavy chain H3; Short=ITI heavy chain H3; Short=ITI-HC3; Short=Inter-alpha-inhibitor heavy chain 3; Flags: Precursor OS=Rattus norvegicus (Rat)
	ABCBB_RAT	146165	4	RecName: Full=Bile salt export pump; AltName: Full=ATP-binding cassette sub-family B member 11; AltName: Full=Sister of P-glycoprotein OS=Rattus norvegicus (Rat)
	UBA1_RAT	117713	2	RecName: Full=Ubiquitin-like modifier-activating enzyme 1 {ECO:0000250|UniProtKB:Q02053}; AltName: Full=Ubiquitin-activating enzyme E1 {ECO:0000250|UniProtKB:Q02053} OS=Rattus norvegicus (Rat)
	D3ZBN4_RAT	15795	2	SubName: Full=Protein RGD1310769 {ECO:0000313|Ensembl:ENSRNOP00000012327}; SubName: Full=Similar to HSPC288 (Predicted)
	CP4F6_RAT	61502	4	RecName: Full=Cytochrome P450 4F6; EC=1.14.14.1; AltName: Full=CYPIVF6 OS=Rattus norvegicus (Rat)
	SEP15_RAT	17812	3	RecName: Full=15 kDa selenoprotein; Flags: Precursor OS=Rattus norvegicus (Rat)
	D3ZGK7_RAT	60272	4	RecName: Full=Carboxylic ester hydrolase; EC=3.1.1.- OS=Rattus norvegicus (Rat)
	FRIH_RAT	21113	3	RecName: Full=Ferritin heavy chain; Short=Ferritin H subunit; EC=1.16.3.1; Contains: RecName: Full=Ferritin heavy chain
	SOAT2_RAT	60458	3	RecName: Full=Sterol O-acyltransferase 2; EC=2.3.1.26; AltName: Full=Acyl-coenzyme A:cholesterol acyltransferase 2; Short=ACAT-2; AltName: Full=Cholesterol acyltransferase 2 OS=Rattus norvegicus (Rat)
	B2RYS2_RAT	13550	4	RecName: Full=Cytochrome b-c1 complex subunit 7 {ECO:0000256|PIRNR:PIRNR000022} OS=Rattus norvegicus (Rat)
	NLRX1_RAT	107522	5	RecName: Full=NLR family member X1; Flags: Precursor OS=Rattus norvegicus (Rat)
	GLYAT_RAT	33877	3	RecName: Full=Glycine N-acyltransferase; EC=2.3.1.13; EC=2.3.1.71; AltName: Full=Acyl-CoA:glycine N-acyltransferase; Short=AAc; AltName: Full=Aralkyl acyl-CoA N-acyltransferase; AltName: Full=Aralkyl acyl-CoA:amino acid N-acyltransferase; AltName: F
	IOD1_RAT	29712	2	RecName: Full=Type I iodothyronine deiodinase; EC=1.97.1.10; AltName: Full=5DI; AltName: Full=DIOI; AltName: Full=Type 1 DI; AltName: Full=Type-I 5'-deiodinase OS=Rattus norvegicus (Rat)
	CP27A_RAT	60695	4	RecName: Full=Sterol 26-hydroxylase
	DAD1_RAT	12489	3	RecName: Full=Dolichyl-diphosphooligosaccharide--protein glycosyltransferase subunit DAD1; Short=Oligosaccharyl transferase subunit DAD1; EC=2.4.99.18; AltName: Full=Defender against cell death 1; Short=DAD-1 OS=Rattus norvegicus (Rat)
	Q7TMC0_RAT	39953	2	SubName: Full=Ab2-001 {ECO:0000313|EMBL:AAP92579.1}; SubName: Full=Ab2-011 {ECO:0000313|EMBL:AAP92575.1}; SubName: Full=Uncharacterized protein {ECO:0000313|Ensembl:ENSRNOP00000047103} OS=Rattus norvegicus (Rat)
	EST1C_RAT	60136	4	RecName: Full=Carboxylesterase 1C; EC=3.1.1.1; AltName: Full=Carboxyesterase ES-1; Short=E1; AltName: Full=ES-THET; AltName: Full=Esterase-2; AltName: Full=Liver carboxylesterase 1; AltName: Full=Neutral retinyl ester hydrolase; Short=NREH; AltName:
	RL32_RAT	15850	3	RecName: Full=60S ribosomal protein L32 OS=Rattus norvegicus (Rat)
	A0A096XKT9_RAT	68538	4	RecName: Full=NADH-ubiquinone oxidoreductase chain 5 {ECO:0000256|RuleBase:RU003404
	PARK7_RAT	19961	2	RecName: Full=Protein deglycase DJ-1 {ECO:0000250|UniProtKB:Q99497}; EC=3.1.2.- {ECO:0000250|UniProtKB:Q99497}; EC=3.5.1.- {ECO:0000250|UniProtKB:Q99497}; AltName: Full=Contraception-associated protein 1 {ECO:0000303|PubMed:9792810}; Short=Protein C
	ATIF1_RAT	12240	1	RecName: Full=ATPase inhibitor
	SAR1B_RAT	22396	3	RecName: Full=GTP-binding protein SAR1b OS=Rattus norvegicus (Rat)
	D4ADD7_RAT	16422	2	SubName: Full=Glutaredoxin 5 homolog (S. cerevisiae) (Predicted)
	ATPD_RAT	17584	2	RecName: Full=ATP synthase subunit delta
	Q7TQ90_RAT	93787	5	RecName: Full=S-(hydroxymethyl)glutathione dehydrogenase {ECO:0000256|RuleBase:RU362016}; EC=1.1.1.284 {ECO:0000256|RuleBase:RU362016} OS=Rattus norvegicus (Rat)
	RL23_RAT	14856	4	RecName: Full=60S ribosomal protein L23 OS=Rattus norvegicus (Rat)
	D3ZJF4_RAT	33197	2	SubName: Full=Uncharacterized protein {ECO:0000313|Ensembl:ENSRNOP00000041984}; Flags: Fragment OS=Rattus norvegicus (Rat)
	D4A565_RAT	21650	5	SubName: Full=NADH dehydrogenase (Ubiquinone) 1 beta subcomplex
	D3ZUX5_RAT	26418	3	SubName: Full=Coiled-coil-helix-coiled-coil-helix domain containing 3 (Predicted)
	A0A096MIU7_RAT	16206	3	RecName: Full=40S ribosomal protein S24 {ECO:0000256|RuleBase:RU004383}; Flags: Fragment OS=Rattus norvegicus (Rat)
	D3ZD11_RAT	24958	4	SubName: Full=Protein Spcs2 {ECO:0000313|Ensembl:ENSRNOP00000024772} OS=Rattus norvegicus (Rat)
	APOA1_RAT	30043	5	RecName: Full=Apolipoprotein A-I; Short=Apo-AI; Short=ApoA-I; AltName: Full=Apolipoprotein A1; Contains: RecName: Full=Proapolipoprotein A-I; Short=ProapoA-I; Flags: Precursor OS=Rattus norvegicus (Rat)
	GABT_RAT	56419	5	RecName: Full=4-aminobutyrate aminotransferase
	MAAI_RAT	23946	4	RecName: Full=Maleylacetoacetate isomerase; Short=MAAI; EC=5.2.1.2; AltName: Full=GSTZ1-1; AltName: Full=Glutathione S-transferase zeta 1; EC=2.5.1.18 OS=Rattus norvegicus (Rat)
	D3Z8D7_RAT	12998	3	SubName: Full=Protein LOC100361854 {ECO:0000313|Ensembl:ENSRNOP00000048116} OS=Rattus norvegicus (Rat)
	GPX1_RAT	22292	5	RecName: Full=Glutathione peroxidase 1; Short=GPx-1; Short=GSHPx-1; EC=1.11.1.9; AltName: Full=Cellular glutathione peroxidase OS=Rattus norvegicus (Rat)
	Q5EB55_RAT	61793	3	SubName: Full=Gbe1 protein {ECO:0000313|EMBL:AAH90037.1}; Flags: Fragment OS=Rattus norvegicus (Rat)
	D4A2K1_RAT	34443	3	SubName: Full=Protein Hoga1 {ECO:0000313|Ensembl:ENSRNOP00000047674}; SubName: Full=Similar to RIKEN cDNA 0610010D20 (Predicted) {ECO:0000313|EMBL:EDL94226.1} OS=Rattus norvegicus (Rat)
	F1LPG5_RAT	15055	4	SubName: Full=Protein LOC691675 {ECO:0000313|Ensembl:ENSRNOP00000003674} OS=Rattus norvegicus (Rat)
	D4AAE9_RAT	15283	4	SubName: Full=Protein Cisd2 {ECO:0000313|Ensembl:ENSRNOP00000066613}; SubName: Full=Similar to RIKEN cDNA 1500009M05 (Predicted) {ECO:0000313|EMBL:EDL82257.1} OS=Rattus norvegicus (Rat)
	B2GV15_RAT	53240	3	SubName: Full=Dihydrolipoamide branched chain transacylase E2 {ECO:0000313|EMBL:AAI66487.1}; SubName: Full=Dihydrolipoamide branched chain transacylase E2
	Q5BK05_RAT	49912	3	SubName: Full=LOC367586 protein {ECO:0000313|EMBL:AAH91257.1} OS=Rattus norvegicus (Rat)
	PEMT_RAT	22472	2	RecName: Full=Phosphatidylethanolamine N-methyltransferase; Short=PEAMT; Short=PEMT; EC=2.1.1.17; EC=2.1.1.71 OS=Rattus norvegicus (Rat)
	RL18A_RAT	20719	4	RecName: Full=60S ribosomal protein L18a OS=Rattus norvegicus (Rat)
	S5A1_RAT	29761	4	RecName: Full=3-oxo-5-alpha-steroid 4-dehydrogenase 1; EC=1.3.1.22; AltName: Full=SR type 1; AltName: Full=Steroid 5-alpha-reductase 1; Short=S5AR 1 OS=Rattus norvegicus (Rat)
	Q6TXE9_RAT	166676	4	SubName: Full=LRRGT00050 {ECO:0000313|EMBL:AAQ96263.1}; SubName: Full=Protein Eprs {ECO:0000313|Ensembl:ENSRNOP00000033323} OS=Rattus norvegicus (Rat)
	RAB18_RAT	22962	4	RecName: Full=Ras-related protein Rab-18; Flags: Precursor OS=Rattus norvegicus (Rat)
	F1M6F4_RAT	13636	3	SubName: Full=Protein LOC100912210 {ECO:0000313|Ensembl:ENSRNOP00000047391}; Flags: Fragment OS=Rattus norvegicus (Rat)
	COMT_RAT	29578	6	RecName: Full=Catechol O-methyltransferase; EC=2.1.1.6 OS=Rattus norvegicus (Rat)
	LETM1_RAT	83008	8	RecName: Full=LETM1 and EF-hand domain-containing protein 1
	APT_RAT	19533	3	RecName: Full=Adenine phosphoribosyltransferase; Short=APRT; EC=2.4.2.7 OS=Rattus norvegicus (Rat)
	D3ZXR5_RAT	24717	3	SubName: Full=Uncharacterized protein {ECO:0000313|Ensembl:ENSRNOP00000044451} OS=Rattus norvegicus (Rat)
	A0A096MJY6_RAT	47134	2	SubName: Full=Protein Gbe1 {ECO:0000313|Ensembl:ENSRNOP00000068309} OS=Rattus norvegicus (Rat)
	HNRPK_RAT	50944	2	RecName: Full=Heterogeneous nuclear ribonucleoprotein K; Short=hnRNP K; AltName: Full=dC stretch-binding protein; Short=CSBP OS=Rattus norvegicus (Rat)
	F1M983_RAT	139916	4	SubName: Full=Protein Cfh {ECO:0000313|Ensembl:ENSRNOP00000017749} OS=Rattus norvegicus (Rat)
	PGAM1_RAT	28814	4	RecName: Full=Phosphoglycerate mutase 1; EC=3.1.3.13; EC=5.4.2.11; EC=5.4.2.4; AltName: Full=BPG-dependent PGAM 1; AltName: Full=Phosphoglycerate mutase isozyme B; Short=PGAM-B OS=Rattus norvegicus (Rat)
	IDHP_RAT	50935	5	RecName: Full=Isocitrate dehydrogenase [NADP]
	SSRA_RAT	35607	3	RecName: Full=Translocon-associated protein subunit alpha; Short=TRAP-alpha; AltName: Full=Liver regeneration-related protein LRRG137; AltName: Full=Signal sequence receptor subunit alpha; Short=SSR-alpha; Flags: Precursor OS=Rattus norvegicus (Rat)
	1433Z_RAT	27754	2	RecName: Full=14-3-3 protein zeta/delta; AltName: Full=Mitochondrial import stimulation factor S1 subunit; AltName: Full=Protein kinase C inhibitor protein 1; Short=KCIP-1 OS=Rattus norvegicus (Rat)
	PRDX2_RAT	21770	3	RecName: Full=Peroxiredoxin-2; EC=1.11.1.15; AltName: Full=Thiol-specific antioxidant protein; Short=TSA; AltName: Full=Thioredoxin peroxidase 1; AltName: Full=Thioredoxin-dependent peroxide reductase 1 OS=Rattus norvegicus (Rat)
	ADK_RAT	40108	2	RecName: Full=Adenosine kinase; Short=AK; EC=2.7.1.20; AltName: Full=Adenosine 5'-phosphotransferase OS=Rattus norvegicus (Rat)
	TIM10_RAT	10326	2	RecName: Full=Mitochondrial import inner membrane translocase subunit Tim10 OS=Rattus norvegicus (Rat)
	ERG1_RAT	63984	4	RecName: Full=Squalene monooxygenase; EC=1.14.13.132; AltName: Full=Squalene epoxidase; Short=SE OS=Rattus norvegicus (Rat)
	K1C18_RAT	47732	5	RecName: Full=Keratin
	GSTK1_RAT	25476	2	RecName: Full=Glutathione S-transferase kappa 1; EC=2.5.1.18; AltName: Full=GST 13-13; AltName: Full=GST class-kappa; AltName: Full=GSTK1-1; Short=rGSTK1; AltName: Full=Glutathione S-transferase subunit 13 OS=Rattus norvegicus (Rat)
	GRN_RAT	63325	4	RecName: Full=Granulins; Contains: RecName: Full=Acrogranin; AltName: Full=Progranulin; Contains: RecName: Full=Granulin-1; AltName: Full=Granulin G; Contains: RecName: Full=Granulin-2; AltName: Full=Granulin F; Contains: RecName: Full=Granulin-3; A
	RL13_RAT	24294	2	RecName: Full=60S ribosomal protein L13 OS=Rattus norvegicus (Rat)
	SC22B_RAT	24725	2	RecName: Full=Vesicle-trafficking protein SEC22b; AltName: Full=ER-Golgi SNARE of 24 kDa; Short=ERS-24; Short=ERS24; AltName: Full=SEC22 vesicle-trafficking protein homolog B; AltName: Full=SEC22 vesicle-trafficking protein-like 1 OS=Rattus norvegic
	Q7TMA9_RAT	116387	4	SubName: Full=Aa1249 {ECO:0000313|EMBL:AAP85372.1}; SubName: Full=Ab1-341 {ECO:0000313|EMBL:AAP92619.1}; SubName: Full=Ab2-196 {ECO:0000313|EMBL:AAP92597.1}; SubName: Full=Ac1-114 {ECO:0000313|EMBL:AAP86250.1}; SubName: Full=Ac1262 {ECO:0000313|EMBL
	ML12B_RAT	19826	4	RecName: Full=Myosin regulatory light chain 12B; AltName: Full=Myosin RLC-B; AltName: Full=Myosin regulatory light chain 2-B
	F1LN92_RAT	89296	5	SubName: Full=Protein Afg3l2 {ECO:0000313|Ensembl:ENSRNOP00000024632} OS=Rattus norvegicus (Rat)
	B5DFH4_RAT	69367	3	SubName: Full=Papss2 protein {ECO:0000313|EMBL:AAI69061.1}; SubName: Full=Protein Papss2 {ECO:0000313|Ensembl:ENSRNOP00000014979} OS=Rattus norvegicus (Rat)
	LMF2_RAT	80203	2	RecName: Full=Lipase maturation factor 2 OS=Rattus norvegicus (Rat)
	AASS_RAT	102842	1	RecName: Full=Alpha-aminoadipic semialdehyde synthase
	TMED9_RAT	27011	3	RecName: Full=Transmembrane emp24 domain-containing protein 9; AltName: Full=p24 family protein alpha-2; Short=p24alpha2; Flags: Precursor OS=Rattus norvegicus (Rat)
	B5DEL9_RAT	22113	7	SubName: Full=RCG62292
	QCR8_RAT	9843	4	RecName: Full=Cytochrome b-c1 complex subunit 8; AltName: Full=Complex III subunit 8; AltName: Full=Complex III subunit VIII; AltName: Full=Low molecular mass ubiquinone-binding protein; AltName: Full=Ubiquinol-cytochrome c reductase complex 9.5 kDa
	D3ZTP0_RAT	102911	6	RecName: Full=10-formyltetrahydrofolate dehydrogenase {ECO:0000256|PIRNR:PIRNR036489}; EC=1.5.1.6 {ECO:0000256|PIRNR:PIRNR036489} OS=Rattus norvegicus (Rat)
	Q5XI04_RAT	31358	2	SubName: Full=Protein Stom {ECO:0000313|Ensembl:ENSRNOP00000025904}; SubName: Full=RCG45489
	B5DEX7_RAT	131374	4	SubName: Full=Atp13a1 protein {ECO:0000313|EMBL:AAI68844.1}; Flags: Fragment OS=Rattus norvegicus (Rat)
	MPC2_RAT	14249	5	RecName: Full=Mitochondrial pyruvate carrier 2; AltName: Full=Brain protein 44; AltName: Full=Protein 0-44 OS=Rattus norvegicus (Rat)
	NDRG2_RAT	40753	3	RecName: Full=Protein NDRG2; AltName: Full=Antidepressant-related protein ADRG123; AltName: Full=N-myc downstream-regulated gene 2 protein; AltName: Full=NDRG1-related protein OS=Rattus norvegicus (Rat)
	RL17_RAT	21383	5	RecName: Full=60S ribosomal protein L17; AltName: Full=Amino acid starvation-induced protein; Short=ASI; AltName: Full=L23 OS=Rattus norvegicus (Rat)
	CTNB1_RAT	85400	2	RecName: Full=Catenin beta-1; AltName: Full=Beta-catenin OS=Rattus norvegicus (Rat)
	TIM13_RAT	10451	2	RecName: Full=Mitochondrial import inner membrane translocase subunit Tim13 OS=Rattus norvegicus (Rat)
	T23O_RAT	47826	1	RecName: Full=Tryptophan 2
	RL35_RAT	14544	4	RecName: Full=60S ribosomal protein L35 OS=Rattus norvegicus (Rat)
	ACADV_RAT	70705	6	RecName: Full=Very long-chain specific acyl-CoA dehydrogenase
	RL27_RAT	15788	3	RecName: Full=60S ribosomal protein L27 OS=Rattus norvegicus (Rat)
	ATP5H_RAT	18752	3	RecName: Full=ATP synthase subunit d
	Q68FT7_RAT	65609	4	SubName: Full=Phenylalanyl-tRNA synthetase
	Q5FVG4_RAT	24624	3	SubName: Full=Protein LOC100911440 {ECO:0000313|Ensembl:ENSRNOP00000025240}; SubName: Full=Solute carrier family 25 (Mitochondrial carrier
	Q7TPJ3_RAT	92451	5	RecName: Full=Beta-glucuronidase {ECO:0000256|RuleBase:RU361154}; EC=3.2.1.31 {ECO:0000256|RuleBase:RU361154} OS=Rattus norvegicus (Rat)
	ARK72_RAT	40649	4	RecName: Full=Aflatoxin B1 aldehyde reductase member 2; Short=rAFAR2; EC=1.1.1.n11; AltName: Full=Succinic semialdehyde reductase; Short=SSA reductase OS=Rattus norvegicus (Rat)
	EF1G_RAT	50029	3	RecName: Full=Elongation factor 1-gamma; Short=EF-1-gamma; AltName: Full=eEF-1B gamma OS=Rattus norvegicus (Rat)
	EMC3_RAT	29960	2	RecName: Full=ER membrane protein complex subunit 3; AltName: Full=Transmembrane protein 111 OS=Rattus norvegicus (Rat)
	IRGM_RAT	46308	2	RecName: Full=Immunity-related GTPase family M protein; EC=3.6.5.- OS=Rattus norvegicus (Rat)
	ARF4_RAT	20384	3	RecName: Full=ADP-ribosylation factor 4 OS=Rattus norvegicus (Rat)
	KCY_RAT	22155	2	RecName: Full=UMP-CMP kinase {ECO:0000255|HAMAP-Rule:MF_03172}; EC=2.7.4.14 {ECO:0000255|HAMAP-Rule:MF_03172}; AltName: Full=Deoxycytidylate kinase {ECO:0000255|HAMAP-Rule:MF_03172}; Short=CK {ECO:0000255|HAMAP-Rule:MF_03172}; Short=dCMP kinase {ECO
	M0R907_RAT	13907	2	SubName: Full=Protein Snrpd3 {ECO:0000313|Ensembl:ENSRNOP00000065967}; SubName: Full=RCG60635
	M0R9L0_RAT	220062	2	SubName: Full=Protein Naca {ECO:0000313|Ensembl:ENSRNOP00000066181} OS=Rattus norvegicus (Rat)
	ABHEB_RAT	22604	3	RecName: Full=Alpha/beta hydrolase domain-containing protein 14B; Short=Abhydrolase domain-containing protein 14B; EC=3.-.-.- OS=Rattus norvegicus (Rat)
	ECHD3_RAT	32365	2	RecName: Full=Enoyl-CoA hydratase domain-containing protein 3
	IR3IP_RAT	8993	3	RecName: Full=Immediate early response 3-interacting protein 1 OS=Rattus norvegicus (Rat)
	AMYP_RAT	57141	3	RecName: Full=Pancreatic alpha-amylase; Short=PA; EC=3.2.1.1; AltName: Full=1
	A0A096MK30_RAT	67785	4	SubName: Full=Moesin {ECO:0000313|Ensembl:ENSRNOP00000068359}; SubName: Full=Moesin
	B1H250_RAT	33964	3	SubName: Full=Protein RGD1564894 {ECO:0000313|Ensembl:ENSRNOP00000051684}; SubName: Full=RGD1564894 protein {ECO:0000313|EMBL:AAI60862.1} OS=Rattus norvegicus (Rat)
	NHRF1_RAT	38807	3	RecName: Full=Na(+)/H(+) exchange regulatory cofactor NHE-RF1; Short=NHERF-1; AltName: Full=Ezrin-radixin-moesin-binding phosphoprotein 50; Short=EBP50; AltName: Full=Regulatory cofactor of Na(+)/H(+) exchanger; AltName: Full=Sodium-hydrogen exchang
	THTM_RAT	32919	5	RecName: Full=3-mercaptopyruvate sulfurtransferase; Short=MST; EC=2.8.1.2 OS=Rattus norvegicus (Rat)
	KAT3_RAT	51011	3	RecName: Full=Kynurenine--oxoglutarate transaminase 3; EC=2.6.1.7; AltName: Full=Cysteine-S-conjugate beta-lyase 2; EC=4.4.1.13; AltName: Full=Kynurenine aminotransferase III; Short=KATIII; AltName: Full=Kynurenine--glyoxylate transaminase; EC=2.6.1
	HOT_RAT	50193	1	RecName: Full=Hydroxyacid-oxoacid transhydrogenase
	ACTN4_RAT	104849	6	RecName: Full=Alpha-actinin-4 {ECO:0000305}; AltName: Full=Non-muscle alpha-actinin 4 {ECO:0000305} OS=Rattus norvegicus (Rat)
	COX41_RAT	19502	6	RecName: Full=Cytochrome c oxidase subunit 4 isoform 1
	G3V9J8_RAT	93668	3	SubName: Full=Glycerol-3-phosphate acyltransferase 1
	Q52KJ9_RAT	31415	3	SubName: Full=Protein Tmx1 {ECO:0000313|Ensembl:ENSRNOP00000009587}; SubName: Full=Thioredoxin domain containing 1 {ECO:0000313|EMBL:AAH94308.1} OS=Rattus norvegicus (Rat)
	D4ADC3_RAT	16711	2	SubName: Full=Protein Mgst2 {ECO:0000313|Ensembl:ENSRNOP00000017785} OS=Rattus norvegicus (Rat)
	D3ZM21_RAT	28969	3	SubName: Full=Catechol-O-methyltransferase domain containing 1 (Predicted)
	D4A5K9_RAT	80668	2	SubName: Full=Glycogen [starch] synthase
	ATRN_RAT	158568	2	RecName: Full=Attractin; AltName: Full=Protein zitter; Flags: Precursor OS=Rattus norvegicus (Rat)
	PHS_RAT	11992	4	RecName: Full=Pterin-4-alpha-carbinolamine dehydratase; Short=PHS; EC=4.2.1.96; AltName: Full=4-alpha-hydroxy-tetrahydropterin dehydratase; AltName: Full=Dimerization cofactor of hepatocyte nuclear factor 1-alpha; Short=DCoH; Short=Dimerization cofa
	NUCL_RAT	77101	3	RecName: Full=Nucleolin; AltName: Full=Protein C23 OS=Rattus norvegicus (Rat)
	PEBP1_RAT	20788	3	RecName: Full=Phosphatidylethanolamine-binding protein 1; Short=PEBP-1; AltName: Full=23 kDa morphine-binding protein; AltName: Full=HCNPpp; AltName: Full=P23K; Contains: RecName: Full=Hippocampal cholinergic neurostimulating peptide; Short=HCNP OS=
	Q5U302_RAT	100174	2	SubName: Full=Catenin (Cadherin associated protein)
	A9UMW1_RAT	25493	4	RecName: Full=Glutathione S-transferase {ECO:0000256|RuleBase:RU004454}; EC=2.5.1.18 {ECO:0000256|RuleBase:RU004454} OS=Rattus norvegicus (Rat)
	1433G_RAT	28285	2	RecName: Full=14-3-3 protein gamma; Contains: RecName: Full=14-3-3 protein gamma
	Q4V8H5_RAT	52522	2	SubName: Full=Aspartyl aminopeptidase {ECO:0000313|EMBL:AAH97388.1}; SubName: Full=Aspartyl aminopeptidase
	PAHX_RAT	38563	2	RecName: Full=Phytanoyl-CoA dioxygenase
	M0R7A4_RAT	21679	3	SubName: Full=Uncharacterized protein {ECO:0000313|Ensembl:ENSRNOP00000065327}; Flags: Fragment OS=Rattus norvegicus (Rat)
	E9PSS8_RAT	35264	5	SubName: Full=Protein RT1-A1 {ECO:0000313|Ensembl:ENSRNOP00000039088} OS=Rattus norvegicus (Rat)
	TPM4_RAT	28492	4	RecName: Full=Tropomyosin alpha-4 chain; AltName: Full=Tropomyosin-4; Short=TM-4 OS=Rattus norvegicus (Rat)
	F1LW74_RAT	180537	5	SubName: Full=Protein Iqgap2 {ECO:0000313|Ensembl:ENSRNOP00000029373} OS=Rattus norvegicus (Rat)
	PRS6B_RAT	47379	5	RecName: Full=26S protease regulatory subunit 6B; AltName: Full=26S proteasome AAA-ATPase subunit RPT3; AltName: Full=Proteasome 26S subunit ATPase 4; Short=S6 ATPase; AltName: Full=Tat-binding protein 7; Short=TBP-7 OS=Rattus norvegicus (Rat)
	Q99JC6_RAT	50013	2	SubName: Full=Protein Tapbp {ECO:0000313|Ensembl:ENSRNOP00000045630}; SubName: Full=TAP binding protein {ECO:0000313|EMBL:AAH62007.1}; SubName: Full=Tap-binding protein (Tapasin) {ECO:0000313|EMBL:CAE83920.1}; SubName: Full=Tapasin {ECO:0000313|EMBL
	E9PTA5_RAT	105098	3	SubName: Full=Protein Pign {ECO:0000313|Ensembl:ENSRNOP00000020752} OS=Rattus norvegicus (Rat)
	Q5U2S7_RAT	60650	3	SubName: Full=Proteasome (Prosome
	F1LZZ6_RAT	273236	3	SubName: Full=Uncharacterized protein {ECO:0000313|Ensembl:ENSRNOP00000056294} OS=Rattus norvegicus (Rat)
	TIM8A_RAT	11035	2	RecName: Full=Mitochondrial import inner membrane translocase subunit Tim8 A; AltName: Full=Deafness dystonia protein 1 homolog OS=Rattus norvegicus (Rat)
	CP2J3_RAT	57932	3	RecName: Full=Cytochrome P450 2J3; EC=1.14.14.1; AltName: Full=CYPIIJ3 OS=Rattus norvegicus (Rat)
	TFR2_RAT	88273	4	RecName: Full=Transferrin receptor protein 2; Short=TfR2 OS=Rattus norvegicus (Rat)
	THIO_RAT	11666	3	RecName: Full=Thioredoxin; Short=Trx OS=Rattus norvegicus (Rat)
	ATP5I_RAT	8249	3	RecName: Full=ATP synthase subunit e
	F1LXA0_RAT	17167	2	SubName: Full=NADH dehydrogenase (Ubiquinone) 1 alpha subcomplex
	RL10_RAT	24588	4	RecName: Full=60S ribosomal protein L10 OS=Rattus norvegicus (Rat)
	3HAO_RAT	32561	1	RecName: Full=3-hydroxyanthranilate 3
	Q6TUG7_RAT	32123	3	SubName: Full=LRRGT00077 {ECO:0000313|EMBL:AAQ91033.1}; SubName: Full=Uncharacterized protein {ECO:0000313|Ensembl:ENSRNOP00000049614} OS=Rattus norvegicus (Rat)
	SAP_RAT	61084	2	RecName: Full=Sulfated glycoprotein 1; Short=SGP-1; AltName: Full=Prosaposin; Flags: Precursor OS=Rattus norvegicus (Rat)
	Q9QYQ2_RAT	39094	5	SubName: Full=A2h {ECO:0000313|EMBL:CAB56210.1}; Flags: Fragment OS=Rattus norvegicus (Rat)
	K1C10_RAT	56470	4	RecName: Full=Keratin
	Q8BHI5_RAT	57050	2	RecName: Full=O-acyltransferase {ECO:0000256|PIRNR:PIRNR000439} OS=Rattus norvegicus (Rat)
	ATP5L_RAT	11426	2	RecName: Full=ATP synthase subunit g
	3HIDH_RAT	35280	1	RecName: Full=3-hydroxyisobutyrate dehydrogenase
	F162A_RAT	17816	4	RecName: Full=Protein FAM162A; AltName: Full=E2-induced gene 5 protein homolog OS=Rattus norvegicus (Rat)
	F1MAR6_RAT	68051	4	SubName: Full=Protein Prodh {ECO:0000313|Ensembl:ENSRNOP00000002576} OS=Rattus norvegicus (Rat)
	HMCS1_RAT	57397	2	RecName: Full=Hydroxymethylglutaryl-CoA synthase
	R9PXR4_RAT	61899	4	SubName: Full=Mitochondrial import receptor subunit TOM70 {ECO:0000313|Ensembl:ENSRNOP00000002238} OS=Rattus norvegicus (Rat)
	E9PU34_RAT	51666	2	SubName: Full=Protein Rmnd1 {ECO:0000313|Ensembl:ENSRNOP00000057484}; SubName: Full=RCG41110 {ECO:0000313|EMBL:EDL92866.1} OS=Rattus norvegicus (Rat)
	F1LQI1_RAT	34136	3	SubName: Full=Hydroxyacyl glutathione hydrolase {ECO:0000313|EMBL:EDM03882.1}; SubName: Full=Hydroxyacylglutathione hydrolase
	G3V9G4_RAT	119637	3	SubName: Full=ATP citrate lyase
	FINC_RAT	272341	6	RecName: Full=Fibronectin; Short=FN; Contains: RecName: Full=Anastellin; Flags: Precursor OS=Rattus norvegicus (Rat)
	SYJ2B_RAT	15815	3	RecName: Full=Synaptojanin-2-binding protein; AltName: Full=Mitochondrial outer membrane protein 25; AltName: Full=NPW16 OS=Rattus norvegicus (Rat)
	COPB_RAT	106943	3	RecName: Full=Coatomer subunit beta; AltName: Full=Beta-coat protein; Short=Beta-COP OS=Rattus norvegicus (Rat)
	PCYOX_RAT	56252	3	RecName: Full=Prenylcysteine oxidase; EC=1.8.3.5; AltName: Full=Chloride ion pump-associated 55 kDa protein; Flags: Precursor OS=Rattus norvegicus (Rat)
	Q5M7T5_RAT	52201	5	SubName: Full=Protein Serpinc1 {ECO:0000313|Ensembl:ENSRNOP00000003748}; SubName: Full=Serine (Or cysteine) peptidase inhibitor
	B3AT_RAT	103107	4	RecName: Full=Band 3 anion transport protein; AltName: Full=Anion exchange protein 1; Short=AE 1; Short=Anion exchanger 1; AltName: Full=Solute carrier family 4 member 1; AltName: CD_antigen=CD233 OS=Rattus norvegicus (Rat)
	IF2G_RAT	51047	5	RecName: Full=Eukaryotic translation initiation factor 2 subunit 3; AltName: Full=Eukaryotic translation initiation factor 2 subunit gamma; Short=eIF-2-gamma; AltName: Full=PP42 OS=Rattus norvegicus (Rat)
	SCRB2_RAT	54056	1	RecName: Full=Lysosome membrane protein 2; AltName: Full=85 kDa lysosomal membrane sialoglycoprotein; Short=LGP85; AltName: Full=CD36 antigen-like 2; AltName: Full=Lysosome membrane protein II; Short=LIMP II; AltName: Full=Scavenger receptor class B
	D3ZE31_RAT	61892	4	RecName: Full=Carboxylic ester hydrolase; EC=3.1.1.- OS=Rattus norvegicus (Rat)
	F8V328_RAT	23653	2	SubName: Full=RAB8 {ECO:0000313|EMBL:AEJ31940.1}; SubName: Full=RAB8A
	D3ZFF4_RAT	44537	3	SubName: Full=Protein Lclat1 {ECO:0000313|Ensembl:ENSRNOP00000050960}; SubName: Full=Similar to lysocardiolipin acyltransferase isoform 1 (Predicted) {ECO:0000313|EMBL:EDM02860.1} OS=Rattus norvegicus (Rat)
	CX6A1_RAT	12293	2	RecName: Full=Cytochrome c oxidase subunit 6A1
	TM9S2_RAT	75536	3	RecName: Full=Transmembrane 9 superfamily member 2; Flags: Precursor OS=Rattus norvegicus (Rat)
	D3Z9J3_RAT	127681	5	RecName: Full=Phospholipid-transporting ATPase {ECO:0000256|RuleBase:RU362033}; EC=3.6.3.1 {ECO:0000256|RuleBase:RU362033
	CP3A9_RAT	57774	4	RecName: Full=Cytochrome P450 3A9; EC=1.14.14.1; AltName: Full=3AH15; AltName: Full=CYPIIIA9; AltName: Full=Cytochrome P450 olfactive 3; AltName: Full=Cytochrome P450-OLF3 OS=Rattus norvegicus (Rat)
	B2RYD7_RAT	93376	5	SubName: Full=Protein Stt3b {ECO:0000313|Ensembl:ENSRNOP00000017243}; SubName: Full=RCG25591
	F1LPS8_RAT	33716	1	SubName: Full=Transcriptional activator protein Pur-alpha {ECO:0000313|Ensembl:ENSRNOP00000025756} OS=Rattus norvegicus (Rat)
	F1M853_RAT	170887	2	SubName: Full=Protein Rrbp1 {ECO:0000313|Ensembl:ENSRNOP00000052465} OS=Rattus norvegicus (Rat)
	TMCO1_RAT	21161	2	RecName: Full=Transmembrane and coiled-coil domains protein 1; AltName: Full=Meg-2-like protein OS=Rattus norvegicus (Rat)
	SYAC_RAT	106723	2	RecName: Full=Alanine--tRNA ligase
	MYADM_RAT	35125	2	RecName: Full=Myeloid-associated differentiation marker; AltName: Full=Myeloid up-regulated protein OS=Rattus norvegicus (Rat)
	S22AI_RAT	43001	3	RecName: Full=Solute carrier family 22 member 18; AltName: Full=Organic cation transporter-like protein 2; Short=ORCTL-2 OS=Rattus norvegicus (Rat)
	LMNA_RAT	74279	3	RecName: Full=Prelamin-A/C; Contains: RecName: Full=Lamin-A/C; Flags: Precursor OS=Rattus norvegicus (Rat)
	D3ZTR5_RAT	83981	1	SubName: Full=Protein Zbed5 {ECO:0000313|Ensembl:ENSRNOP00000001220}; SubName: Full=RCG21454 {ECO:0000313|EMBL:EDM13482.1} OS=Rattus norvegicus (Rat)
	E0A3N4_RAT	48010	2	SubName: Full=Serpina3n-like protein {ECO:0000313|EMBL:ADK91429.1} OS=Rattus norvegicus (Rat)
	G3V8V4_RAT	44922	2	SubName: Full=Longevity assurance homolog 2 (S. cerevisiae) {ECO:0000313|EMBL:EDL85715.1}; SubName: Full=Protein Cers2 {ECO:0000313|Ensembl:ENSRNOP00000028699} OS=Rattus norvegicus (Rat)
	CP4AA_RAT	58178	5	RecName: Full=Cytochrome P450 4A10; AltName: Full=CYPIVA10; AltName: Full=Cytochrome P450-LA-omega 1; AltName: Full=Cytochrome P452; AltName: Full=Lauric acid omega-hydroxylase; EC=1.14.15.3; Contains: RecName: Full=Cytochrome P450 4A10
	B0BN46_RAT	35915	3	SubName: Full=Grhpr protein {ECO:0000313|EMBL:AAI58681.1}; SubName: Full=Protein Grhpr {ECO:0000313|Ensembl:ENSRNOP00000046867}; SubName: Full=RCG54768
	TCPD_RAT	58063	3	RecName: Full=T-complex protein 1 subunit delta; Short=TCP-1-delta; AltName: Full=CCT-delta OS=Rattus norvegicus (Rat)
	GPDM_RAT	80921	2	RecName: Full=Glycerol-3-phosphate dehydrogenase
	Q7TP78_RAT	21952	2	SubName: Full=Aa2-258 {ECO:0000313|EMBL:AAP92568.1}; SubName: Full=Protein Ndufa8 {ECO:0000313|Ensembl:ENSRNOP00000050148} OS=Rattus norvegicus (Rat)
	SPTN1_RAT	284462	4	RecName: Full=Spectrin alpha chain
	GSTT2_RAT	27422	3	RecName: Full=Glutathione S-transferase theta-2; EC=2.5.1.18; AltName: Full=GST 12-12; AltName: Full=GST class-theta-2; AltName: Full=Glutathione S-transferase 12; AltName: Full=Glutathione S-transferase Yrs-Yrs OS=Rattus norvegicus (Rat)
	MCCB_RAT	61478	4	RecName: Full=Methylcrotonoyl-CoA carboxylase beta chain
	G3V852_RAT	269504	3	SubName: Full=Protein Tln1 {ECO:0000313|Ensembl:ENSRNOP00000022401}; SubName: Full=RCG55135
	B2RYW3_RAT	21878	3	SubName: Full=NADH dehydrogenase (Ubiquinone) 1 beta subcomplex
	AP2A2_RAT	103979	3	RecName: Full=AP-2 complex subunit alpha-2; AltName: Full=100 kDa coated vesicle protein C; AltName: Full=Adaptor protein complex AP-2 subunit alpha-2; AltName: Full=Adaptor-related protein complex 2 subunit alpha-2; AltName: Full=Alpha-adaptin C; A
	ERO1A_RAT	53984	3	RecName: Full=ERO1-like protein alpha; Short=ERO1-L; Short=ERO1-L-alpha; EC=1.8.4.-; AltName: Full=Endoplasmic reticulum oxidoreductin-1-like protein; AltName: Full=Global ischemia-induced protein 11; AltName: Full=Oxidoreductin-1-L-alpha; Flags: Pr
	E9PU16_RAT	33675	3	SubName: Full=Ras-related protein Rab-1A {ECO:0000313|Ensembl:ENSRNOP00000045598} OS=Rattus norvegicus (Rat)
	D4AE09_RAT	53304	3	SubName: Full=Cytochrome P450
	B7SE83_9MURI	51638	2	RecName: Full=NADH-ubiquinone oxidoreductase chain 4 {ECO:0000256|RuleBase:RU003297
	ODPB_RAT	38957	3	RecName: Full=Pyruvate dehydrogenase E1 component subunit beta
	D3ZQL1_RAT	19071	2	SubName: Full=Protein RGD1305045 {ECO:0000313|Ensembl:ENSRNOP00000008364}; SubName: Full=Putative uncharacterized protein RGD1305045_predicted {ECO:0000313|EMBL:EDL79803.1} OS=Rattus norvegicus (Rat)
	B5DFC3_RAT	86106	3	SubName: Full=Protein Sec23a {ECO:0000313|Ensembl:ENSRNOP00000006369}; SubName: Full=SEC23A (S. cerevisiae) (Predicted) {ECO:0000313|EMBL:EDM03463.1}; SubName: Full=Sec23 homolog A (S. cerevisiae) {ECO:0000313|EMBL:AAI69006.1} OS=Rattus norvegicus (
	F1LUM5_RAT	42805	3	SubName: Full=Protein Tubal3 {ECO:0000313|Ensembl:ENSRNOP00000031564}; SubName: Full=Tubulin
	ARP3_RAT	47327	2	RecName: Full=Actin-related protein 3; AltName: Full=Actin-like protein 3 OS=Rattus norvegicus (Rat)
	G6PC_RAT	40529	1	RecName: Full=Glucose-6-phosphatase; Short=G-6-Pase; Short=G6Pase; EC=3.1.3.9 OS=Rattus norvegicus (Rat)
	GELS_RAT	86014	2	RecName: Full=Gelsolin; AltName: Full=Actin-depolymerizing factor; Short=ADF; AltName: Full=Brevin; Flags: Precursor OS=Rattus norvegicus (Rat)
	F1M1B3_RAT	134123	2	SubName: Full=Protein RGD1564420 {ECO:0000313|Ensembl:ENSRNOP00000013315} OS=Rattus norvegicus (Rat)
	RL24_RAT	17768	2	RecName: Full=60S ribosomal protein L24; AltName: Full=L30 OS=Rattus norvegicus (Rat)
	CATC_RAT	52202	2	RecName: Full=Dipeptidyl peptidase 1; EC=3.4.14.1; AltName: Full=Cathepsin C; AltName: Full=Cathepsin J; AltName: Full=Dipeptidyl peptidase I; Short=DPP-I; Short=DPPI; AltName: Full=Dipeptidyl transferase; Contains: RecName: Full=Dipeptidyl peptidas
	A0A096MJZ2_RAT	49582	2	SubName: Full=Protein Tbl2 {ECO:0000313|Ensembl:ENSRNOP00000068316}; SubName: Full=RCG21429
	Q8K3R0_RAT	61762	6	RecName: Full=Carboxylic ester hydrolase; EC=3.1.1.- OS=Rattus norvegicus (Rat)
	AT1B3_RAT	31809	2	RecName: Full=Sodium/potassium-transporting ATPase subunit beta-3; AltName: Full=Sodium/potassium-dependent ATPase subunit beta-3; Short=ATPB-3; AltName: CD_antigen=CD298 OS=Rattus norvegicus (Rat)
	D3Z9U2_RAT	120643	3	SubName: Full=CD163 antigen (Predicted) {ECO:0000313|EMBL:EDM01961.1}; SubName: Full=Protein Cd163 {ECO:0000313|Ensembl:ENSRNOP00000058828} OS=Rattus norvegicus (Rat)
	D4A7W1_RAT	48304	2	SubName: Full=Abhydrolase domain containing 2 (Predicted) {ECO:0000313|EMBL:EDM08574.1}; SubName: Full=Protein Abhd2 {ECO:0000313|Ensembl:ENSRNOP00000023506} OS=Rattus norvegicus (Rat)
	ODO1_RAT	116221	4	RecName: Full=2-oxoglutarate dehydrogenase
	GSH0_RAT	30529	2	RecName: Full=Glutamate--cysteine ligase regulatory subunit; AltName: Full=GCS light chain; AltName: Full=Gamma-ECS regulatory subunit; AltName: Full=Gamma-glutamylcysteine synthetase regulatory subunit; AltName: Full=Glutamate--cysteine ligase modi
	Q5U314_RAT	57573	2	SubName: Full=ATP-binding cassette
	B2GUU4_RAT	94334	2	RecName: Full=Lon protease homolog 2
	Q9WTN7_RAT	57481	2	SubName: Full=Sterol 12-alpha hydroxylase {ECO:0000313|EMBL:BAA76602.1} OS=Rattus norvegicus (Rat)
	RAB9A_RAT	22881	2	RecName: Full=Ras-related protein Rab-9A OS=Rattus norvegicus (Rat)
	KHK_RAT	32729	3	RecName: Full=Ketohexokinase {ECO:0000312|RGD:2966}; EC=2.7.1.3; AltName: Full=Hepatic fructokinase OS=Rattus norvegicus (Rat)
	GDIA_RAT	50504	2	RecName: Full=Rab GDP dissociation inhibitor alpha; Short=Rab GDI alpha; AltName: Full=Guanosine diphosphate dissociation inhibitor 1; Short=GDI-1 OS=Rattus norvegicus (Rat)
	A1L1L6_RAT	72111	2	RecName: Full=Mitochondrial Rho GTPase {ECO:0000256|PIRNR:PIRNR037488}; EC=3.6.5.- {ECO:0000256|PIRNR:PIRNR037488} OS=Rattus norvegicus (Rat)
	B1H282_RAT	71069	2	SubName: Full=Glycosyltransferase 25 domain containing 1 {ECO:0000313|EMBL:AAI60899.1}; SubName: Full=Glycosyltransferase 25 domain containing 1 (Predicted) {ECO:0000313|EMBL:EDL90767.1}; SubName: Full=Protein Colgalt1 {ECO:0000313|Ensembl:ENSRNOP00
	PSMD1_RAT	105681	3	RecName: Full=26S proteasome non-ATPase regulatory subunit 1; AltName: Full=26S proteasome regulatory subunit RPN2; AltName: Full=26S proteasome regulatory subunit S1; AltName: Full=26S proteasome subunit p112 OS=Rattus norvegicus (Rat)
	D3ZFC6_RAT	103416	3	SubName: Full=Protein Itih4 {ECO:0000313|Ensembl:ENSRNOP00000048673} OS=Rattus norvegicus (Rat)
	CSK21_RAT	45045	1	RecName: Full=Casein kinase II subunit alpha; Short=CK II alpha; EC=2.7.11.1 OS=Rattus norvegicus (Rat)
	F1M0Q9_RAT	46587	3	SubName: Full=Protein Pm20d1 {ECO:0000313|Ensembl:ENSRNOP00000009838}; Flags: Fragment OS=Rattus norvegicus (Rat)
	RHOA_RAT	21768	4	RecName: Full=Transforming protein RhoA; Flags: Precursor OS=Rattus norvegicus (Rat)
	Q4FZU0_RAT	47250	3	SubName: Full=Acid phosphatase 6
	A1KXK4_RAT	60006	6	SubName: Full=3-beta-hydroxysterol delta 24 reductase {ECO:0000313|EMBL:AAS66628.1} OS=Rattus norvegicus (Rat)
	DCAKD_RAT	27335	2	RecName: Full=Dephospho-CoA kinase domain-containing protein OS=Rattus norvegicus (Rat)
	RAP1B_RAT	20785	5	RecName: Full=Ras-related protein Rap-1b; AltName: Full=GTP-binding protein smg p21B; Flags: Precursor OS=Rattus norvegicus (Rat)
	B2RZC1_RAT	23205	2	SubName: Full=Retinol binding protein 4
	B2RYS0_RAT	9347	2	SubName: Full=Cox7a2 protein {ECO:0000313|EMBL:AAI66880.1}; SubName: Full=RCG25255
	AL1A1_RAT	54424	2	RecName: Full=Retinal dehydrogenase 1; Short=RALDH 1; Short=RalDH1; EC=1.2.1.36; AltName: Full=ALDH-E1; AltName: Full=ALHDII; AltName: Full=Aldehyde dehydrogenase family 1 member A1; AltName: Full=Aldehyde dehydrogenase
	STS_RAT	62638	3	RecName: Full=Steryl-sulfatase; EC=3.1.6.2; AltName: Full=Arylsulfatase C; Short=ASC; AltName: Full=Steroid sulfatase; AltName: Full=Steryl-sulfate sulfohydrolase; Flags: Precursor OS=Rattus norvegicus (Rat)
	C1QBP_RAT	30978	2	RecName: Full=Complement component 1 Q subcomponent-binding protein
	D3ZCF8_RAT	183940	3	SubName: Full=Protein Abca8 {ECO:0000313|Ensembl:ENSRNOP00000005665} OS=Rattus norvegicus (Rat)
	D4ACQ2_RAT	14479	2	SubName: Full=Protein LOC690384 {ECO:0000313|Ensembl:ENSRNOP00000057262} OS=Rattus norvegicus (Rat)
	TRAM1_RAT	43003	2	RecName: Full=Translocating chain-associated membrane protein 1 OS=Rattus norvegicus (Rat)
	TRA2B_RAT	33646	2	RecName: Full=Transformer-2 protein homolog beta; Short=TRA-2 beta; Short=TRA2-beta; AltName: Full=RA301; AltName: Full=Splicing factor
	ACSF2_RAT	67843	3	RecName: Full=Acyl-CoA synthetase family member 2
	AMPN_RAT	109380	2	RecName: Full=Aminopeptidase N; Short=AP-N; Short=rAPN; EC=3.4.11.2; AltName: Full=Alanyl aminopeptidase; AltName: Full=Aminopeptidase M; Short=AP-M; AltName: Full=Kidney Zn peptidase; Short=KZP; AltName: Full=Microsomal aminopeptidase; AltName: CD_
	Q68HW7_RAT	73124	2	SubName: Full=ABC transporter ABCG3 {ECO:0000313|EMBL:AAT99308.1} OS=Rattus norvegicus (Rat)
	F1LLX8_RAT	45127	2	SubName: Full=Lysosome-associated membrane glycoprotein 2 {ECO:0000313|Ensembl:ENSRNOP00000000177} OS=Rattus norvegicus (Rat)
	AMBP_RAT	38826	3	RecName: Full=Protein AMBP; Contains: RecName: Full=Alpha-1-microglobulin; Contains: RecName: Full=Inter-alpha-trypsin inhibitor light chain; Short=ITI-LC; AltName: Full=Bikunin; AltName: Full=HI-30; Contains: RecName: Full=Trypstatin; Flags: Precur
	ACSL4_RAT	74279	2	RecName: Full=Long-chain-fatty-acid--CoA ligase 4; EC=6.2.1.3; AltName: Full=Long-chain acyl-CoA synthetase 4; Short=LACS 4 OS=Rattus norvegicus (Rat)
	LAMP1_RAT	43941	2	RecName: Full=Lysosome-associated membrane glycoprotein 1; Short=LAMP-1; Short=Lysosome-associated membrane protein 1; AltName: Full=120 kDa lysosomal membrane glycoprotein; Short=LGP-120; AltName: Full=CD107 antigen-like family member A; AltName: C
	D3ZZ95_RAT	12402	2	RecName: Full=60S ribosomal protein L36 {ECO:0000256|RuleBase:RU000665} OS=Rattus norvegicus (Rat)
	F1M6Y6_RAT	20741	2	SubName: Full=Protein LOC100365502 {ECO:0000313|Ensembl:ENSRNOP00000045662} OS=Rattus norvegicus (Rat)
	A0A096MIX2_RAT	72599	3	SubName: Full=DEAD (Asp-Glu-Ala-Asp) box polypeptide 17
	Q6AY18_RAT	22384	2	SubName: Full=Protein Sar1a {ECO:0000313|Ensembl:ENSRNOP00000000673}; SubName: Full=SAR1 gene homolog A (S. cerevisiae)
	D3ZF07_RAT	16577	2	SubName: Full=Protein RGD1562402 {ECO:0000313|Ensembl:ENSRNOP00000048422} OS=Rattus norvegicus (Rat)
	MRP6_RAT	164890	2	RecName: Full=Multidrug resistance-associated protein 6; AltName: Full=ATP-binding cassette sub-family C member 6; AltName: Full=MRP-like protein 1; Short=MLP-1 OS=Rattus norvegicus (Rat)
	M0R7B4_RAT	23198	2	SubName: Full=Protein LOC684828 {ECO:0000313|Ensembl:ENSRNOP00000065338} OS=Rattus norvegicus (Rat)
	HNRH1_RAT	49157	2	RecName: Full=Heterogeneous nuclear ribonucleoprotein H; Short=hnRNP H; AltName: Full=Ratsg1; Contains: RecName: Full=Heterogeneous nuclear ribonucleoprotein H
	ERLN2_RAT	37686	2	RecName: Full=Erlin-2 {ECO:0000250|UniProtKB:Q8BFZ9}; AltName: Full=Endoplasmic reticulum lipid raft-associated protein 2 {ECO:0000250|UniProtKB:Q8BFZ9
	MMGT1_RAT	14668	1	RecName: Full=Membrane magnesium transporter 1 {ECO:0000250|UniProtKB:Q8K273}; AltName: Full=ER membrane protein complex subunit 5; AltName: Full=Transmembrane protein 32 {ECO:0000312|EMBL:AAI68927.1}; Flags: Precursor OS=Rattus norvegicus (Rat)
	PCKGC_RAT	69371	3	RecName: Full=Phosphoenolpyruvate carboxykinase
	NDUV3_RAT	11934	2	RecName: Full=NADH dehydrogenase [ubiquinone] flavoprotein 3
	D4A9Y0_RAT	23389	2	SubName: Full=Protein Sdf2l1 {ECO:0000313|Ensembl:ENSRNOP00000002540}; SubName: Full=RCG36668 {ECO:0000313|EMBL:EDL77877.1} OS=Rattus norvegicus (Rat)
	MGLL_RAT	33478	3	RecName: Full=Monoglyceride lipase {ECO:0000305}; Short=MGL; EC=3.1.1.23 {ECO:0000250|UniProtKB:Q99685}; AltName: Full=Monoacylglycerol lipase; Short=MAGL OS=Rattus norvegicus (Rat)
	D3ZFH5_RAT	106460	2	SubName: Full=Protein Itih2 {ECO:0000313|Ensembl:ENSRNOP00000036443} OS=Rattus norvegicus (Rat)
	B0BN51_RAT	23640	2	RecName: Full=Small nuclear ribonucleoprotein-associated protein {ECO:0000256|PIRNR:PIRNR037187} OS=Rattus norvegicus (Rat)
	M0RDI5_RAT	39733	2	SubName: Full=Protein Mcu {ECO:0000313|Ensembl:ENSRNOP00000067686}; SubName: Full=Similar to CG18769-PB
	A3FM27_RAT	28619	2	RecName: Full=Chloride intracellular channel protein {ECO:0000256|RuleBase:RU362009} OS=Rattus norvegicus (Rat)
	FAHD2_RAT	34559	2	RecName: Full=Fumarylacetoacetate hydrolase domain-containing protein 2; EC=3.-.-.- OS=Rattus norvegicus (Rat)
	RL37P_RAT	10268	2	RecName: Full=Putative 60S ribosomal protein L37a; AltName: Full=60S ribosomal protein L37a pseudogene 1 OS=Rattus norvegicus (Rat)
	G3V679_RAT	85822	2	SubName: Full=Transferrin receptor protein 1 {ECO:0000313|Ensembl:ENSRNOP00000002407}; SubName: Full=Transferrin receptor
	Q641Z9_RAT	18191	3	SubName: Full=Protein Sdhc {ECO:0000313|Ensembl:ENSRNOP00000004228}; SubName: Full=Succinate dehydrogenase complex
	FCGRN_RAT	40143	2	RecName: Full=IgG receptor FcRn large subunit p51; Short=FcRn; AltName: Full=IgG Fc fragment receptor transporter alpha chain; AltName: Full=Neonatal Fc receptor; Flags: Precursor OS=Rattus norvegicus (Rat)
	Q5U3Y8_RAT	17688	1	RecName: Full=Transcription factor BTF3 {ECO:0000256|RuleBase:RU361272} OS=Rattus norvegicus (Rat)
	STIM1_RAT	77401	2	RecName: Full=Stromal interaction molecule 1; Flags: Precursor OS=Rattus norvegicus (Rat)
	GTR2_RAT	57049	2	RecName: Full=Solute carrier family 2
	DHTK1_RAT	102576	5	RecName: Full=Probable 2-oxoglutarate dehydrogenase E1 component DHKTD1
	B0BMT9_RAT	50170	2	SubName: Full=Protein Sqrdl {ECO:0000313|Ensembl:ENSRNOP00000061547}; SubName: Full=Sqrdl protein {ECO:0000313|EMBL:AAI58560.1}; SubName: Full=Sulfide quinone reductase-like (Yeast)
	F1LPQ6_RAT	38674	3	SubName: Full=Uncharacterized protein {ECO:0000313|Ensembl:ENSRNOP00000039536}; Flags: Fragment OS=Rattus norvegicus (Rat)
	D3ZNH4_RAT	15483	3	RecName: Full=Histone H2B {ECO:0000256|RuleBase:RU000451} OS=Rattus norvegicus (Rat)
	Q5RJN0_RAT	23929	3	SubName: Full=NADH dehydrogenase (Ubiquinone) Fe-S protein 7 {ECO:0000313|EMBL:AAH86574.1}; SubName: Full=NADH dehydrogenase (Ubiquinone) Fe-S protein 7
	OS9_RAT	75318	3	RecName: Full=Protein OS-9; Flags: Precursor OS=Rattus norvegicus (Rat)
	D3ZAK6_RAT	16902	2	SubName: Full=Uncharacterized protein {ECO:0000313|Ensembl:ENSRNOP00000062631} OS=Rattus norvegicus (Rat)
	SO1A1_RAT	74129	2	RecName: Full=Solute carrier organic anion transporter family member 1A1; AltName: Full=Organic anion-transporting polypeptide 1; Short=OATP-1; AltName: Full=Sodium-independent organic anion transporter 1; AltName: Full=Solute carrier family 21 memb
	FAHD1_RAT	24465	2	RecName: Full=Acylpyruvase FAHD1
	ANGT_RAT	51949	2	RecName: Full=Angiotensinogen; AltName: Full=Serpin A8; Contains: RecName: Full=Angiotensin-1; AltName: Full=Angiotensin 1-10; AltName: Full=Angiotensin I; Short=Ang I; Contains: RecName: Full=Angiotensin-2; AltName: Full=Angiotensin 1-8; AltName: F
	ACDSB_RAT	47793	4	RecName: Full=Short/branched chain specific acyl-CoA dehydrogenase
	G3V9X8_RAT	37915	1	SubName: Full=Magnesium transporter protein 1 {ECO:0000313|Ensembl:ENSRNOP00000062502} OS=Rattus norvegicus (Rat)
	GLCTK_RAT	55153	2	RecName: Full=Glycerate kinase; EC=2.7.1.31 OS=Rattus norvegicus (Rat)
	PLST_RAT	70635	3	RecName: Full=Plastin-3; AltName: Full=T-plastin OS=Rattus norvegicus (Rat)
	CALM_RAT	16827	2	RecName: Full=Calmodulin; Short=CaM OS=Rattus norvegicus (Rat)
	PSA1_RAT	29499	2	RecName: Full=Proteasome subunit alpha type-1; EC=3.4.25.1; AltName: Full=Macropain subunit C2; AltName: Full=Multicatalytic endopeptidase complex subunit C2; AltName: Full=Proteasome component C2; AltName: Full=Proteasome nu chain OS=Rattus norvegi
	ABCB7_RAT	82506	2	RecName: Full=ATP-binding cassette sub-family B member 7
	RL29_RAT	17315	2	RecName: Full=60S ribosomal protein L29; AltName: Full=P23 OS=Rattus norvegicus (Rat)
	OAT_RAT	48302	2	RecName: Full=Ornithine aminotransferase
	Q499S2_RAT	14736	1	SubName: Full=ATP synthase F(0) complex subunit C3
	B2RZD6_RAT	9321	2	SubName: Full=Ndufa4 protein {ECO:0000313|EMBL:AAI67115.1}; SubName: Full=Protein Ndufa4 {ECO:0000313|Ensembl:ENSRNOP00000007567}; SubName: Full=RCG28086
	ST1E3_RAT	35393	5	RecName: Full=Estrogen sulfotransferase
	PCY2_RAT	45192	2	RecName: Full=Ethanolamine-phosphate cytidylyltransferase; EC=2.7.7.14; AltName: Full=CTP:phosphoethanolamine cytidylyltransferase; AltName: Full=Phosphorylethanolamine transferase OS=Rattus norvegicus (Rat)
	PBLD_RAT	31667	4	RecName: Full=Phenazine biosynthesis-like domain-containing protein; EC=5.1.-.- OS=Rattus norvegicus (Rat)
	FIS1_RAT	16984	2	RecName: Full=Mitochondrial fission 1 protein; AltName: Full=FIS1 homolog; Short=rFis1; AltName: Full=Tetratricopeptide repeat protein 11; Short=TPR repeat protein 11 OS=Rattus norvegicus (Rat)
	ECE1_RAT	86071	1	RecName: Full=Endothelin-converting enzyme 1; Short=ECE-1; EC=3.4.24.71 OS=Rattus norvegicus (Rat)
	IF4A3_RAT	46811	2	RecName: Full=Eukaryotic initiation factor 4A-III; Short=eIF-4A-III; Short=eIF4A-III; EC=3.6.4.13; AltName: Full=ATP-dependent RNA helicase DDX48; AltName: Full=ATP-dependent RNA helicase eIF4A-3; AltName: Full=DEAD box protein 48; AltName: Full=Euk
	Q4KMA8_RAT	106367	2	SubName: Full=Endoplasmic reticulum aminopeptidase 1 {ECO:0000313|Ensembl:ENSRNOP00000013625}; SubName: Full=Erap1 protein {ECO:0000313|EMBL:AAH98664.1}; SubName: Full=Type 1 tumor necrosis factor receptor shedding aminopeptidase regulator
	AFAM_RAT	69290	2	RecName: Full=Afamin; AltName: Full=Alpha-albumin; Short=Alpha-Alb; Flags: Precursor OS=Rattus norvegicus (Rat)
	Q6IMY8_RAT	87678	2	SubName: Full=Heterogeneous nuclear ribonucleoprotein U {ECO:0000313|EMBL:AAH72529.1}; SubName: Full=Protein Hnrnpu {ECO:0000313|Ensembl:ENSRNOP00000046783}; SubName: Full=RCG20317
	Q3KRE2_RAT	28123	3	SubName: Full=Methyltransferase like 7A {ECO:0000313|EMBL:AAI05761.1}; SubName: Full=Methyltransferase like 7A
	Q7TP42_RAT	67888	2	SubName: Full=Ab2-292 {ECO:0000313|EMBL:AAP92608.1}; SubName: Full=Protein Sec62 {ECO:0000313|Ensembl:ENSRNOP00000012240} OS=Rattus norvegicus (Rat)
	G3V6L9_RAT	25163	2	RecName: Full=Peptidyl-prolyl cis-trans isomerase {ECO:0000256|RuleBase:RU004231} OS=Rattus norvegicus (Rat)
	FMO4_RAT	63619	3	RecName: Full=Dimethylaniline monooxygenase [N-oxide-forming] 4; EC=1.14.13.8; AltName: Full=Dimethylaniline oxidase 4; AltName: Full=Hepatic flavin-containing monooxygenase 4; Short=FMO 4 OS=Rattus norvegicus (Rat)
	D3ZBC7_RAT	32302	3	SubName: Full=Protein RGD1305508 {ECO:0000313|Ensembl:ENSRNOP00000012826}; Flags: Fragment OS=Rattus norvegicus (Rat)
	F1LM33_RAT	156581	3	SubName: Full=Leucine-rich PPR motif-containing protein
	COPD_RAT	57163	2	RecName: Full=Coatomer subunit delta; AltName: Full=Archain; AltName: Full=Delta-coat protein; Short=Delta-COP OS=Rattus norvegicus (Rat)
	RS21_RAT	9122	2	RecName: Full=40S ribosomal protein S21 OS=Rattus norvegicus (Rat)
	K2C8_RAT	53985	2	RecName: Full=Keratin
	ASGR2_RAT	35005	5	RecName: Full=Asialoglycoprotein receptor 2; Short=ASGP-R 2; Short=ASGPR 2; AltName: Full=Hepatic lectin R2/3; Short=HL-2; Short=rHL-2 OS=Rattus norvegicus (Rat)
	S22A7_RAT	58616	2	RecName: Full=Solute carrier family 22 member 7; AltName: Full=Novel liver transporter; AltName: Full=Organic anion transporter 2 OS=Rattus norvegicus (Rat)
	M0RBL9_RAT	78947	3	SubName: Full=Protein Vwa8 {ECO:0000313|Ensembl:ENSRNOP00000066959}; Flags: Fragment OS=Rattus norvegicus (Rat)
	F1M0L7_RAT	36263	3	RecName: Full=Annexin {ECO:0000256|RuleBase:RU003540}; Flags: Fragment OS=Rattus norvegicus (Rat)
	Q5XI77_RAT	54126	2	RecName: Full=Annexin {ECO:0000256|RuleBase:RU003540} OS=Rattus norvegicus (Rat)
	HSP74_RAT	93997	2	RecName: Full=Heat shock 70 kDa protein 4; AltName: Full=Ischemia responsive 94 kDa protein OS=Rattus norvegicus (Rat)
	Q7M079_RAT	1977	1	SubName: Full=Calcium-binding protein 4 {ECO:0000313|PIR:B34473}; Flags: Fragment OS=Rattus norvegicus (Rat)
	ECH1_RAT	36148	2	RecName: Full=Delta(3
	MESD_RAT	25200	2	RecName: Full=LDLR chaperone MESD; AltName: Full=Mesoderm development candidate 2; AltName: Full=Mesoderm development protein; Flags: Precursor OS=Rattus norvegicus (Rat)
	VKGC_RAT	87423	3	RecName: Full=Vitamin K-dependent gamma-carboxylase; EC=4.1.1.90; AltName: Full=Gamma-glutamyl carboxylase; AltName: Full=Peptidyl-glutamate 4-carboxylase; AltName: Full=Vitamin K gamma glutamyl carboxylase OS=Rattus norvegicus (Rat)
	A0A0A1FZ34_RAT	56899	2	RecName: Full=Cytochrome c oxidase subunit 1 {ECO:0000256|RuleBase:RU000369}; EC=1.9.3.1 {ECO:0000256|RuleBase:RU000369} OS=Rattus norvegicus (Rat)
	PYRD2_RAT	62839	3	RecName: Full=Pyridine nucleotide-disulfide oxidoreductase domain-containing protein 2; EC=1.-.-.- OS=Rattus norvegicus (Rat)
	ERF1_RAT	49000	2	RecName: Full=Eukaryotic peptide chain release factor subunit 1; Short=Eukaryotic release factor 1; Short=eRF1 OS=Rattus norvegicus (Rat)
	PROF1_RAT	14948	3	RecName: Full=Profilin-1; AltName: Full=Profilin I OS=Rattus norvegicus (Rat)
	K2C1_RAT	64791	2	RecName: Full=Keratin
	ASAH2_RAT	83435	1	RecName: Full=Neutral ceramidase; Short=N-CDase; Short=NCDase; EC=3.5.1.23; AltName: Full=Acylsphingosine deacylase 2; AltName: Full=N-acylsphingosine amidohydrolase 2; Contains: RecName: Full=Neutral ceramidase soluble form OS=Rattus norvegicus (Ra
	B2RYX1_RAT	7457	2	SubName: Full=LOC685322 protein {ECO:0000313|EMBL:AAI66935.1}; SubName: Full=RCG36127
	ACOT2_RAT	49670	2	RecName: Full=Acyl-coenzyme A thioesterase 2
	ABHD6_RAT	38287	2	RecName: Full=Monoacylglycerol lipase ABHD6 {ECO:0000305}; EC=3.1.1.23 {ECO:0000250|UniProtKB:Q9BV23}; AltName: Full=2-arachidonoylglycerol hydrolase {ECO:0000250|UniProtKB:Q8R2Y0}; AltName: Full=Abhydrolase domain-containing protein 6 {ECO:0000312|
	Q5I0K1_RAT	43863	3	SubName: Full=Pipecolic acid oxidase {ECO:0000313|EMBL:AAH88249.1}; SubName: Full=Protein Pipox {ECO:0000313|Ensembl:ENSRNOP00000012154} OS=Rattus norvegicus (Rat)
	GNAI3_RAT	40496	4	RecName: Full=Guanine nucleotide-binding protein G(k) subunit alpha; AltName: Full=G(i) alpha-3 OS=Rattus norvegicus (Rat)
	D3ZIN5_RAT	150188	2	SubName: Full=Protein Vwa8 {ECO:0000313|Ensembl:ENSRNOP00000013780}; Flags: Fragment OS=Rattus norvegicus (Rat)
	PREB_RAT	45329	2	RecName: Full=Prolactin regulatory element-binding protein; AltName: Full=Mammalian guanine nucleotide exchange factor mSec12 OS=Rattus norvegicus (Rat)
	Q4KM66_RAT	25676	3	SubName: Full=LOC500183 protein {ECO:0000313|EMBL:AAH98746.1} OS=Rattus norvegicus (Rat)
	CISY_RAT	51833	2	RecName: Full=Citrate synthase
	D4AEH3_RAT	36469	2	SubName: Full=Proteasome (Prosome
	Q9QX80_RAT	30834	2	SubName: Full=CArG-binding factor A {ECO:0000313|EMBL:AAF31437.1}; SubName: Full=Hnrpab protein {ECO:0000313|EMBL:AAH66664.1}; SubName: Full=Protein Hnrnpab {ECO:0000313|Ensembl:ENSRNOP00000038183}; SubName: Full=RCG34663
	Q6AY58_RAT	27894	2	SubName: Full=B-cell receptor-associated protein 31 {ECO:0000313|EMBL:AAH79182.1}; SubName: Full=B-cell receptor-associated protein 31
	D3ZLT1_RAT	16557	3	SubName: Full=NADH dehydrogenase (Ubiquinone) 1 beta subcomplex
	K1C13_RAT	47699	2	RecName: Full=Keratin
	G3V8A5_RAT	91669	2	SubName: Full=Protein Vps35 {ECO:0000313|Ensembl:ENSRNOP00000024020}; SubName: Full=Vacuolar protein sorting 35 (Mapped)
	Q5PPP1_RAT	23551	2	SubName: Full=Clathrin
	B2RYU0_RAT	11835	1	SubName: Full=NADH dehydrogenase (Ubiquinone) 1 beta subcomplex
	D4AC23_RAT	59620	1	SubName: Full=Protein Cct7 {ECO:0000313|Ensembl:ENSRNOP00000021030}; SubName: Full=RCG55994
	TMM11_RAT	21328	2	RecName: Full=Transmembrane protein 11
	UFSP2_RAT	52274	2	RecName: Full=Ufm1-specific protease 2; Short=UfSP2; EC=3.4.22.- {ECO:0000250|UniProtKB:Q99K23
	TCPB_RAT	57422	2	RecName: Full=T-complex protein 1 subunit beta; Short=TCP-1-beta; AltName: Full=CCT-beta OS=Rattus norvegicus (Rat)
	SO1A4_RAT	73203	3	RecName: Full=Solute carrier organic anion transporter family member 1A4; AltName: Full=Brain digoxin carrier protein; AltName: Full=Brain-specific organic anion transporter; AltName: Full=OATP-B1; AltName: Full=Sodium-independent organic anion-tran
	DCXR_RAT	25703	2	RecName: Full=L-xylulose reductase; Short=XR; EC=1.1.1.10 {ECO:0000269|PubMed:11882650
	NINJ1_RAT	16529	2	RecName: Full=Ninjurin-1; AltName: Full=Nerve injury-induced protein 1 OS=Rattus norvegicus (Rat)
	ABD12_RAT	45267	2	RecName: Full=Monoacylglycerol lipase ABHD12 {ECO:0000305}; EC=3.1.1.23 {ECO:0000250|UniProtKB:Q99LR1}; AltName: Full=2-arachidonoylglycerol hydrolase {ECO:0000305}; AltName: Full=Abhydrolase domain-containing protein 12 {ECO:0000305} OS=Rattus norv
	SO2B1_RAT	74166	1	RecName: Full=Solute carrier organic anion transporter family member 2B1; AltName: Full=Organic anion transporter moatp1; AltName: Full=Solute carrier family 21 member 9 OS=Rattus norvegicus (Rat)
	SGMR1_RAT	25254	1	RecName: Full=Sigma non-opioid intracellular receptor 1; AltName: Full=Sigma 1-type opioid receptor; Short=Sigma1-receptor; Short=Sigma1R OS=Rattus norvegicus (Rat)
	RB11B_RAT	24473	2	RecName: Full=Ras-related protein Rab-11B; Flags: Precursor OS=Rattus norvegicus (Rat)
	G3V7J5_RAT	62369	3	RecName: Full=Carboxylic ester hydrolase {ECO:0000256|RuleBase:RU361235}; EC=3.1.1.- {ECO:0000256|RuleBase:RU361235} OS=Rattus norvegicus (Rat)
	D3ZGU2_RAT	54201	2	SubName: Full=Protein Acss3 {ECO:0000313|Ensembl:ENSRNOP00000062459}; SubName: Full=Putative uncharacterized protein RGD1307051_predicted {ECO:0000313|EMBL:EDM16776.1} OS=Rattus norvegicus (Rat)
	FABP5_RAT	15050	3	RecName: Full=Fatty acid-binding protein
	RMD1_RAT	35378	2	RecName: Full=Regulator of microtubule dynamics protein 1; Short=RMD-1; AltName: Full=Protein FAM82B OS=Rattus norvegicus (Rat)
	Q5U1Z9_RAT	29699	2	SubName: Full=Metaxin 2 {ECO:0000313|EMBL:AAH86360.1}; SubName: Full=Protein Mtx2 {ECO:0000313|Ensembl:ENSRNOP00000002134} OS=Rattus norvegicus (Rat)
	TMED5_RAT	26119	2	RecName: Full=Transmembrane emp24 domain-containing protein 5; AltName: Full=p24 family protein gamma-2; Short=p24gamma2; Flags: Precursor OS=Rattus norvegicus (Rat)
	G3V6I9_RAT	17248	3	SubName: Full=60S ribosomal protein L26 {ECO:0000313|Ensembl:ENSRNOP00000005588}; SubName: Full=RCG33968
	G3V9N7_RAT	48697	2	SubName: Full=Protein Pacsin3 {ECO:0000313|Ensembl:ENSRNOP00000054003} OS=Rattus norvegicus (Rat)
	Q6P9V7_RAT	28617	2	SubName: Full=Proteasome (Prosome
	ENPP3_RAT	99008	2	RecName: Full=Ectonucleotide pyrophosphatase/phosphodiesterase family member 3; Short=E-NPP 3; AltName: Full=B10; AltName: Full=Phosphodiesterase I beta; Short=PD-Ibeta; AltName: Full=Phosphodiesterase I/nucleotide pyrophosphatase 3; AltName: Full=R
	ARL8B_RAT	21525	2	RecName: Full=ADP-ribosylation factor-like protein 8B OS=Rattus norvegicus (Rat)
	DYHC1_RAT	531916	3	RecName: Full=Cytoplasmic dynein 1 heavy chain 1; AltName: Full=Cytoplasmic dynein heavy chain 1; AltName: Full=Dynein heavy chain
	AP2B1_RAT	104486	2	RecName: Full=AP-2 complex subunit beta; AltName: Full=AP105B; AltName: Full=Adaptor protein complex AP-2 subunit beta; AltName: Full=Adaptor-related protein complex 2 subunit beta; AltName: Full=Beta-2-adaptin; AltName: Full=Beta-adaptin; AltName:
	PYRD_RAT	42637	3	RecName: Full=Dihydroorotate dehydrogenase (quinone)
	Q6AYU2_RAT	38197	2	SubName: Full=Pcbp2 protein {ECO:0000313|EMBL:AAH78909.1}; SubName: Full=RCG50739
	MYO1C_RAT	119737	2	RecName: Full=Unconventional myosin-Ic; AltName: Full=Myosin I beta; Short=MMI-beta; Short=MMIb; AltName: Full=Myosin heavy chain myr 2 OS=Rattus norvegicus (Rat)
	MA2A1_RAT	131158	2	RecName: Full=Alpha-mannosidase 2; EC=3.2.1.114; AltName: Full=Golgi alpha-mannosidase II; Short=AMan II; Short=Man II; AltName: Full=Mannosidase alpha class 2A member 1; AltName: Full=Mannosyl-oligosaccharide 1
	IYD1_RAT	32825	2	RecName: Full=Iodotyrosine dehalogenase 1; Short=IYD-1; EC=1.22.1.1; Flags: Precursor OS=Rattus norvegicus (Rat)
	ADRO_RAT	54329	2	RecName: Full=NADPH:adrenodoxin oxidoreductase
	RLA1_RAT	11491	2	RecName: Full=60S acidic ribosomal protein P1 OS=Rattus norvegicus (Rat)
	F261_RAT	54729	2	RecName: Full=6-phosphofructo-2-kinase/fructose-2
	D4A5K6_RAT	54813	2	SubName: Full=Protein Zmpste24 {ECO:0000313|Ensembl:ENSRNOP00000016410}; SubName: Full=Zinc metallopeptidase
	RL39_RAT	6403	1	RecName: Full=60S ribosomal protein L39 OS=Rattus norvegicus (Rat)
	D3ZIW4_RAT	72679	2	SubName: Full=Protein Tmem62 {ECO:0000313|Ensembl:ENSRNOP00000032893} OS=Rattus norvegicus (Rat)
	D3ZLH3_RAT	18754	2	SubName: Full=Uncharacterized protein {ECO:0000313|Ensembl:ENSRNOP00000041263} OS=Rattus norvegicus (Rat)
	BASI_RAT	42409	2	RecName: Full=Basigin; AltName: Full=Glycoprotein CE9; AltName: Full=OX-47 antigen; AltName: CD_antigen=CD147; Flags: Precursor OS=Rattus norvegicus (Rat)
	Q6MGB4_RAT	49469	2	SubName: Full=H2-K region expressed gene 4
	B1WBY5_RAT	63166	2	SubName: Full=DnaJ (Hsp40) homolog
	D3ZH28_RAT	180121	1	SubName: Full=Protein Alpk3 {ECO:0000313|Ensembl:ENSRNOP00000015899} OS=Rattus norvegicus (Rat)
	GLCNE_RAT	79176	3	RecName: Full=Bifunctional UDP-N-acetylglucosamine 2-epimerase/N-acetylmannosamine kinase; AltName: Full=UDP-GlcNAc-2-epimerase/ManAc kinase; Includes: RecName: Full=UDP-N-acetylglucosamine 2-epimerase (hydrolyzing); EC=3.2.1.183; AltName: Full=UDP-
	M0R890_RAT	183577	2	SubName: Full=Protein Abca6 {ECO:0000313|Ensembl:ENSRNOP00000065682} OS=Rattus norvegicus (Rat)
	G3V6S0_RAT	273317	2	SubName: Full=Protein Sptbn1 {ECO:0000313|Ensembl:ENSRNOP00000008210} OS=Rattus norvegicus (Rat)
	D4A4Q4_RAT	14196	2	SubName: Full=Protein Ociad2 {ECO:0000313|Ensembl:ENSRNOP00000002991} OS=Rattus norvegicus (Rat)
	NAMPT_RAT	55403	2	RecName: Full=Nicotinamide phosphoribosyltransferase; Short=NAmPRTase; Short=Nampt; EC=2.4.2.12; AltName: Full=Pre-B-cell colony-enhancing factor 1 homolog; Short=PBEF; AltName: Full=Visfatin OS=Rattus norvegicus (Rat)
	PEX14_RAT	40912	2	RecName: Full=Peroxisomal membrane protein PEX14; AltName: Full=PTS1 receptor-docking protein; AltName: Full=Peroxin-14; AltName: Full=Peroxisomal membrane anchor protein PEX14 OS=Rattus norvegicus (Rat)
	CREL2_RAT	38225	3	RecName: Full=Cysteine-rich with EGF-like domain protein 2; Flags: Precursor OS=Rattus norvegicus (Rat)
	ALDOA_RAT	39327	2	RecName: Full=Fructose-bisphosphate aldolase A; EC=4.1.2.13; AltName: Full=Muscle-type aldolase OS=Rattus norvegicus (Rat)
	HEM6_RAT	49247	3	RecName: Full=Oxygen-dependent coproporphyrinogen-III oxidase
	B0BMV8_RAT	21624	2	SubName: Full=Dihydrofolate reductase {ECO:0000313|EMBL:AAI58584.1}; SubName: Full=RCG44522 {ECO:0000313|EMBL:EDM10015.1} OS=Rattus norvegicus (Rat)
	F7FEZ6_RAT	34202	2	SubName: Full=Heterogeneous nuclear ribonucleoprotein A1 {ECO:0000313|Ensembl:ENSRNOP00000052160} OS=Rattus norvegicus (Rat)
	PRS4_RAT	49154	2	RecName: Full=26S protease regulatory subunit 4; Short=P26s4; AltName: Full=26S proteasome AAA-ATPase subunit RPT2; AltName: Full=Proteasome 26S subunit ATPase 1 OS=Rattus norvegicus (Rat)
	M0R436_RAT	33313	2	SubName: Full=Protein Rnf170 {ECO:0000313|Ensembl:ENSRNOP00000064113}; SubName: Full=Similar to ring finger protein 170
	A16A1_RAT	85361	2	RecName: Full=Aldehyde dehydrogenase family 16 member A1 OS=Rattus norvegicus (Rat)
	Q5M7T6_RAT	40275	2	SubName: Full=ATPase
	PPAL_RAT	48288	2	RecName: Full=Lysosomal acid phosphatase; Short=LAP; EC=3.1.3.2; Flags: Precursor OS=Rattus norvegicus (Rat)
	B5DEN5_RAT	24660	2	SubName: Full=Eukaryotic translation elongation factor 1 beta 2 {ECO:0000313|EMBL:AAI68738.1}; SubName: Full=Protein Eef1b2 {ECO:0000313|Ensembl:ENSRNOP00000036882}; SubName: Full=RCG22471
	Q3B8N9_RAT	32802	2	SubName: Full=Biphenyl hydrolase-like (Serine hydrolase) {ECO:0000313|EMBL:AAI05909.1}; SubName: Full=Protein Bphl {ECO:0000313|Ensembl:ENSRNOP00000023914} OS=Rattus norvegicus (Rat)
	F1LTQ3_RAT	21938	2	SubName: Full=Uncharacterized protein {ECO:0000313|Ensembl:ENSRNOP00000043566}; Flags: Fragment OS=Rattus norvegicus (Rat)
	F1LP82_RAT	21683	1	SubName: Full=Ras-related protein Rab-2A {ECO:0000313|Ensembl:ENSRNOP00000008522}; Flags: Fragment OS=Rattus norvegicus (Rat)
	ITA1_RAT	130726	2	RecName: Full=Integrin alpha-1; AltName: Full=CD49 antigen-like family member A; AltName: Full=Laminin and collagen receptor; AltName: Full=VLA-1; AltName: CD_antigen=CD49a; Flags: Precursor OS=Rattus norvegicus (Rat)
	M0RDK9_RAT	33281	2	SubName: Full=Protein Acad8 {ECO:0000313|Ensembl:ENSRNOP00000067711}; Flags: Fragment OS=Rattus norvegicus (Rat)
	CAPZB_RAT	30609	2	RecName: Full=F-actin-capping protein subunit beta; AltName: Full=CapZ beta OS=Rattus norvegicus (Rat)
	D4A678_RAT	279917	1	SubName: Full=Protein Spta1 {ECO:0000313|Ensembl:ENSRNOP00000061853} OS=Rattus norvegicus (Rat)
	MBOA5_RAT	55981	2	RecName: Full=Lysophospholipid acyltransferase 5; Short=LPLAT 5; EC=2.3.1.-; AltName: Full=1-acylglycerophosphocholine O-acyltransferase; EC=2.3.1.23; AltName: Full=Lysophosphatidylcholine acyltransferase 3; Short=Lyso-PC acyltransferase 3; AltName:
	Q5XIU4_RAT	28216	2	SubName: Full=B-cell receptor-associated protein 29 {ECO:0000313|EMBL:AAH83576.1}; SubName: Full=Protein Bcap29 {ECO:0000313|Ensembl:ENSRNOP00000010631} OS=Rattus norvegicus (Rat)
	C0JPT7_RAT	280320	1	SubName: Full=Filamin alpha {ECO:0000313|EMBL:ACN49086.1}; SubName: Full=Filamin
	F7EHL9_RAT	92902	2	SubName: Full=Protein Hps5 {ECO:0000313|Ensembl:ENSRNOP00000037007} OS=Rattus norvegicus (Rat)
	MIA40_RAT	15457	2	RecName: Full=Mitochondrial intermembrane space import and assembly protein 40; AltName: Full=Coiled-coil-helix-coiled-coil-helix domain-containing protein 4 OS=Rattus norvegicus (Rat)
	D3ZF97_RAT	54631	2	SubName: Full=Protein Erlec1 {ECO:0000313|Ensembl:ENSRNOP00000043115}; SubName: Full=Putative uncharacterized protein RGD1306508_predicted {ECO:0000313|EMBL:EDL98051.1} OS=Rattus norvegicus (Rat)
	G3V9U0_RAT	78837	2	SubName: Full=Acyl-CoA synthetase short-chain family member 2 (Predicted) {ECO:0000313|EMBL:EDL85913.1}; SubName: Full=Protein Acss2 {ECO:0000313|Ensembl:ENSRNOP00000059987} OS=Rattus norvegicus (Rat)
	Proteins identified in APAP treatment 2
			Number of
	Accension	Mass (Da)	Significant Sequences	Description
	G3V6P7_RAT	226273	49	SubName: Full=Myosin
	CPSM_RAT	164476	57	RecName: Full=Carbamoyl-phosphate synthase [ammonia]
	GRP78_RAT	72302	28	RecName: Full=78 kDa glucose-regulated protein; Short=GRP-78; AltName: Full=Heat shock 70 kDa protein 5; AltName: Full=Immunoglobulin heavy chain-binding protein; Short=BiP; AltName: Full=Steroidogenesis-activator polypeptide; Flags: Precursor OS=Ra
	ATPB_RAT	56318	24	RecName: Full=ATP synthase subunit beta
	Q7TMC7_RAT	107343	31	SubName: Full=Ab2-417 {ECO:0000313|EMBL:AAP92615.1}; SubName: Full=Cc1-8 {ECO:0000313|EMBL:AAP92642.1}; SubName: Full=Signal recognition particle receptor subunit beta {ECO:0000313|Ensembl:ENSRNOP00000012725} OS=Rattus norvegicus (Rat)
	D4A1W8_RAT	99125	25	SubName: Full=Microsomal triglyceride transfer protein {ECO:0000313|EMBL:EDL82305.1}; SubName: Full=Protein Mttp {ECO:0000313|Ensembl:ENSRNOP00000014630} OS=Rattus norvegicus (Rat)
	RPN2_RAT	69035	21	RecName: Full=Dolichyl-diphosphooligosaccharide--protein glycosyltransferase subunit 2; EC=2.4.99.18; AltName: Full=Dolichyl-diphosphooligosaccharide--protein glycosyltransferase 63 kDa subunit; AltName: Full=Ribophorin II; Short=RPN-II; AltName: Fu
	ACSL1_RAT	78128	30	RecName: Full=Long-chain-fatty-acid--CoA ligase 1; EC=6.2.1.3; AltName: Full=Long-chain acyl-CoA synthetase 1; Short=LACS 1; AltName: Full=Long-chain-fatty-acid--CoA ligase
	TRFE_RAT	76346	28	RecName: Full=Serotransferrin; Short=Transferrin; AltName: Full=Beta-1 metal-binding globulin; AltName: Full=Liver regeneration-related protein LRRG03; AltName: Full=Siderophilin; Flags: Precursor OS=Rattus norvegicus (Rat)
	PDIA3_RAT	56588	28	RecName: Full=Protein disulfide-isomerase A3; EC=5.3.4.1; AltName: Full=58 kDa glucose-regulated protein; AltName: Full=58 kDa microsomal protein; Short=p58; AltName: Full=Disulfide isomerase ER-60; AltName: Full=Endoplasmic reticulum resident prote
	CP2D1_RAT	57139	22	RecName: Full=Cytochrome P450 2D1; EC=1.14.14.1; AltName: Full=CYPIID1; AltName: Full=Cytochrome P450-CMF1A; AltName: Full=Cytochrome P450-DB1; AltName: Full=Cytochrome P450-UT-7; AltName: Full=Debrisoquine 4-hydroxylase OS=Rattus norvegicus (Rat)
	CLH1_RAT	191477	32	RecName: Full=Clathrin heavy chain 1 OS=Rattus norvegicus (Rat)
	ALBU_RAT	68686	26	RecName: Full=Serum albumin; Flags: Precursor OS=Rattus norvegicus (Rat)
	A0A0A0MY09_RAT	92842	31	SubName: Full=Endoplasmin {ECO:0000313|Ensembl:ENSRNOP00000034846} OS=Rattus norvegicus (Rat)
	CP2DQ_RAT	56648	26	RecName: Full=Cytochrome P450 2D26; EC=1.14.14.1; AltName: Full=CYPIID26; AltName: Full=Cytochrome P450-CMF2; AltName: Full=Cytochrome P450-DB2; AltName: Full=Debrisoquine 4-hydroxylase OS=Rattus norvegicus (Rat)
	CP2CB_RAT	57144	23	RecName: Full=Cytochrome P450 2C11; EC=1.14.14.1; AltName: Full=CYPIIC11; AltName: Full=Cytochrome P-450(M-1); AltName: Full=Cytochrome P450-UT-2; AltName: Full=Cytochrome P450-UT-A; AltName: Full=Cytochrome P450H OS=Rattus norvegicus (Rat)
	SDHA_RAT	71570	23	RecName: Full=Succinate dehydrogenase [ubiquinone] flavoprotein subunit
	UDB15_RAT	61020	18	RecName: Full=UDP-glucuronosyltransferase 2B15; Short=UDPGT 2B15; EC=2.4.1.17; AltName: Full=UDP-glucuronosyltransferase 2B36; Short=UDPGT 2B36; Flags: Precursor OS=Rattus norvegicus (Rat)
	PDIA1_RAT	56916	19	RecName: Full=Protein disulfide-isomerase; Short=PDI; EC=5.3.4.1; AltName: Full=Cellular thyroid hormone-binding protein; AltName: Full=Prolyl 4-hydroxylase subunit beta; Flags: Precursor OS=Rattus norvegicus (Rat)
	HYEP_RAT	52548	23	RecName: Full=Epoxide hydrolase 1; EC=3.3.2.9; AltName: Full=Epoxide hydratase; AltName: Full=Microsomal epoxide hydrolase OS=Rattus norvegicus (Rat)
	Q6P7A7_RAT	68359	25	RecName: Full=Dolichyl-diphosphooligosaccharide--protein glycosyltransferase subunit 1 {ECO:0000256|RuleBase:RU361143}; EC=2.4.99.18 {ECO:0000256|RuleBase:RU361143} OS=Rattus norvegicus (Rat)
	PYC_RAT	129695	22	RecName: Full=Pyruvate carboxylase
	M0RBF1_RAT	186206	36	SubName: Full=Complement C3 {ECO:0000313|Ensembl:ENSRNOP00000066885}; SubName: Full=RCG45082 {ECO:0000313|EMBL:EDL83571.1} OS=Rattus norvegicus (Rat)
	ATPA_RAT	59717	18	RecName: Full=ATP synthase subunit alpha
	CP2DA_RAT	57039	20	RecName: Full=Cytochrome P450 2D10; EC=1.14.14.1; AltName: Full=CYPIID10; AltName: Full=Cytochrome P450-CMF1B; AltName: Full=Cytochrome P450-DB5; AltName: Full=Debrisoquine 4-hydroxylase OS=Rattus norvegicus (Rat)
	TBA1C_RAT	49905	16	RecName: Full=Tubulin alpha-1C chain; AltName: Full=Alpha-tubulin 6; AltName: Full=Tubulin alpha-6 chain OS=Rattus norvegicus (Rat)
	FMO1_RAT	59787	16	RecName: Full=Dimethylaniline monooxygenase [N-oxide-forming] 1; EC=1.14.13.8; AltName: Full=Dimethylaniline oxidase 1; AltName: Full=Hepatic flavin-containing monooxygenase 1; Short=FMO 1 OS=Rattus norvegicus (Rat)
	Q5EB99_RAT	56048	19	SubName: Full=Cytochrome P450-like {ECO:0000313|EMBL:AAH89886.1} OS=Rattus norvegicus (Rat)
	Q68G19_RAT	60987	17	SubName: Full=RCG57123 {ECO:0000313|EMBL:EDL89823.1}; SubName: Full=UDP glucuronosyltransferase 2 family
	PDIA6_RAT	48143	15	RecName: Full=Protein disulfide-isomerase A6; EC=5.3.4.1; AltName: Full=Calcium-binding protein 1; Short=CaBP1; AltName: Full=Protein disulfide isomerase P5; AltName: Full=Thioredoxin domain-containing protein 7; Flags: Precursor OS=Rattus norvegicu
	F1LZW6_RAT	74336	24	SubName: Full=Protein Slc25a13 {ECO:0000313|Ensembl:ENSRNOP00000013816}; Flags: Fragment OS=Rattus norvegicus (Rat)
	ACTB_RAT	41710	15	RecName: Full=Actin
	F1LM22_RAT	60956	17	SubName: Full=UDP-glucuronosyltransferase 2B2 {ECO:0000313|Ensembl:ENSRNOP00000043239} OS=Rattus norvegicus (Rat)
	S27A5_RAT	76217	22	RecName: Full=Bile acyl-CoA synthetase; Short=BACS; EC=6.2.1.7; AltName: Full=Bile acid-CoA ligase; Short=BA-CoA ligase; Short=BAL; AltName: Full=Cholate--CoA ligase; AltName: Full=Fatty acid transport protein 5; Short=FATP-5; AltName: Full=Solute c
	EST4_RAT	62269	14	RecName: Full=Liver carboxylesterase 4; EC=3.1.1.1; AltName: Full=Carboxyesterase ES-4; AltName: Full=Kidney microsomal carboxylesterase; AltName: Full=Microsomal palmitoyl-CoA hydrolase; Flags: Precursor OS=Rattus norvegicus (Rat)
	TBA4A_RAT	49892	15	RecName: Full=Tubulin alpha-4A chain; AltName: Full=Alpha-tubulin 4; AltName: Full=Tubulin alpha-4 chain OS=Rattus norvegicus (Rat)
	D4ABM1_RAT	56153	17	SubName: Full=Cytochrome P450 2C7 {ECO:0000313|Ensembl:ENSRNOP00000045029} OS=Rattus norvegicus (Rat)
	CP2D3_RAT	56605	21	RecName: Full=Cytochrome P450 2D3; EC=1.14.14.1; AltName: Full=CYPIID3; AltName: Full=Cytochrome P450-DB3; AltName: Full=Debrisoquine 4-hydroxylase OS=Rattus norvegicus (Rat)
	NCPR_RAT	76914	20	RecName: Full=NADPH--cytochrome P450 reductase; Short=CPR; Short=P450R; EC=1.6.2.4 OS=Rattus norvegicus (Rat)
	A1I3_RAT	163670	20	RecName: Full=Alpha-1-inhibitor 3; AltName: Full=Alpha-1-inhibitor 3 variant II; Short=Alpha-1-inhibitor III; Flags: Precursor OS=Rattus norvegicus (Rat)
	ASSY_RAT	46467	18	RecName: Full=Argininosuccinate synthase; EC=6.3.4.5; AltName: Full=Citrulline--aspartate ligase OS=Rattus norvegicus (Rat)
	CHDH_RAT	66346	17	RecName: Full=Choline dehydrogenase
	CES1D_RAT	62108	19	RecName: Full=Carboxylesterase 1D; AltName: Full=Carboxyesterase ES-10; AltName: Full=Carboxylesterase 3; EC=3.1.1.1; EC=3.1.1.67; AltName: Full=ES-HVEL; AltName: Full=Fatty acid ethyl ester synthase; Short=FAEE synthase; AltName: Full=Liver carboxy
	F1LN18_RAT	111222	23	SubName: Full=Hypoxia up-regulated protein 1 {ECO:0000313|Ensembl:ENSRNOP00000039172} OS=Rattus norvegicus (Rat)
	A1XF83_RAT	60946	16	SubName: Full=UDP glycosyltransferase 2 family polypeptide B {ECO:0000313|EMBL:ABC71921.1} OS=Rattus norvegicus (Rat)
	AIFM1_RAT	66681	17	RecName: Full=Apoptosis-inducing factor 1
	G3V6T7_RAT	72703	21	RecName: Full=Protein disulfide-isomerase A4 {ECO:0000256|PIRNR:PIRNR036862}; AltName: Full=Endoplasmic reticulum resident protein 72 {ECO:0000256|PIRNR:PIRNR036862} OS=Rattus norvegicus (Rat)
	CH60_RAT	60917	16	RecName: Full=60 kDa heat shock protein
	A1M_RAT	167019	29	RecName: Full=Alpha-1-macroglobulin; Short=Alpha-1-M; AltName: Full=Alpha-1-macroglobulin 165 kDa subunit; Contains: RecName: Full=Alpha-1-macroglobulin 45 kDa subunit; Flags: Precursor OS=Rattus norvegicus (Rat)
	PHB_RAT	29802	11	RecName: Full=Prohibitin OS=Rattus norvegicus (Rat)
	RDH2_RAT	35574	14	RecName: Full=Retinol dehydrogenase 2; EC=1.1.1.105; AltName: Full=29 kDa protein; AltName: Full=Retinol dehydrogenase type II; Short=RODH II OS=Rattus norvegicus (Rat)
	ETFD_RAT	68155	18	RecName: Full=Electron transfer flavoprotein-ubiquinone oxidoreductase
	3BHS5_RAT	42180	14	RecName: Full=3 beta-hydroxysteroid dehydrogenase type 5; AltName: Full=3 beta-hydroxysteroid dehydrogenase type V; Short=3-beta-HSD V; AltName: Full=3-beta-hydroxy-5-ene steroid dehydrogenase; AltName: Full=NADPH-dependent 3-beta-hydroxy-Delta(5)-s
	MUG1_RAT	165221	21	RecName: Full=Murinoglobulin-1; AltName: Full=Alpha-1 inhibitor 3 variant I; AltName: Full=Alpha-X protein; Flags: Precursor OS=Rattus norvegicus (Rat)
	GSTM1_RAT	25897	18	RecName: Full=Glutathione S-transferase Mu 1; EC=2.5.1.18; AltName: Full=GST 3-3; AltName: Full=GSTM1-1; AltName: Full=Glutathione S-transferase Yb-1; Short=GST Yb1 OS=Rattus norvegicus (Rat)
	TERA_RAT	89293	20	RecName: Full=Transitional endoplasmic reticulum ATPase; Short=TER ATPase; EC=3.6.4.6; AltName: Full=15S Mg(2+)-ATPase p97 subunit; AltName: Full=Valosin-containing protein; Short=VCP OS=Rattus norvegicus (Rat)
	B6DYQ2_RAT	25686	17	SubName: Full=Glutathione S-transferase mu 2 {ECO:0000313|EMBL:ACI32119.1}; SubName: Full=RCG28943
	CP2B3_RAT	56348	17	RecName: Full=Cytochrome P450 2B3; EC=1.14.14.1; AltName: Full=CYPIIB3 OS=Rattus norvegicus (Rat)
	VDAC1_RAT	30737	12	RecName: Full=Voltage-dependent anion-selective channel protein 1; Short=VDAC-1; Short=rVDAC1; AltName: Full=Outer mitochondrial membrane protein porin 1 OS=Rattus norvegicus (Rat)
	UD2B1_RAT	60445	16	RecName: Full=UDP-glucuronosyltransferase 2B1; Short=UDPGT 2B1; EC=2.4.1.17; AltName: Full=UDPGTr-2; Flags: Precursor OS=Rattus norvegicus (Rat)
	CP2DI_RAT	56647	14	RecName: Full=Cytochrome P450 2D18; EC=1.14.14.1; AltName: Full=CYPIID18; AltName: Full=Cytochrome P450 2D-29; AltName: Full=Cytochrome P450 2D-35 OS=Rattus norvegicus (Rat)
	ECHA_RAT	82613	18	RecName: Full=Trifunctional enzyme subunit alpha
	AL1L1_RAT	98812	20	RecName: Full=Cytosolic 10-formyltetrahydrofolate dehydrogenase; Short=10-FTHFDH; Short=FDH; EC=1.5.1.6; AltName: Full=Aldehyde dehydrogenase family 1 member L1; AltName: Full=FBP-CI OS=Rattus norvegicus (Rat)
	HBB1_RAT	15969	13	RecName: Full=Hemoglobin subunit beta-1; AltName: Full=Beta-1-globin; AltName: Full=Hemoglobin beta chain
	CP1A2_RAT	58222	14	RecName: Full=Cytochrome P450 1A2; EC=1.14.14.1; AltName: Full=CYPIA2; AltName: Full=Cytochrome P-448; AltName: Full=Cytochrome P-450d; AltName: Full=Cytochrome P450-D OS=Rattus norvegicus (Rat)
	UGGG1_RAT	176320	23	RecName: Full=UDP-glucose:glycoprotein glucosyltransferase 1; Short=UGT1; Short=rUGT1; EC=2.4.1.-; AltName: Full=UDP--Glc:glycoprotein glucosyltransferase; AltName: Full=UDP-glucose ceramide glucosyltransferase-like 1; Flags: Precursor OS=Rattus nor
	S27A2_RAT	70648	29	RecName: Full=Very long-chain acyl-CoA synthetase; Short=VLACS; Short=VLCS; EC=6.2.1.-; AltName: Full=Fatty acid transport protein 2; Short=FATP-2; AltName: Full=Fatty-acid-coenzyme A ligase
	RDH3_RAT	35639	15	RecName: Full=Retinol dehydrogenase 3; EC=1.1.1.105; AltName: Full=Retinol dehydrogenase type I; Short=RODH I OS=Rattus norvegicus (Rat)
	Q6T5E9_RAT	60196	16	SubName: Full=Protein LOC100912040 {ECO:0000313|Ensembl:ENSRNOP00000030374}; SubName: Full=RCG55639
	FMO3_RAT	59921	18	RecName: Full=Dimethylaniline monooxygenase [N-oxide-forming] 3; EC=1.14.13.8; AltName: Full=Dimethylaniline oxidase 3; AltName: Full=Hepatic flavin-containing monooxygenase 3; Short=FMO 3; AltName: Full=Trimethylamine monooxygenase; EC=1.14.13.148
	CATA_RAT	59719	17	RecName: Full=Catalase; EC=1.11.1.6 OS=Rattus norvegicus (Rat)
	G3V928_RAT	504558	22	SubName: Full=Protein Lrp1 {ECO:0000313|Ensembl:ENSRNOP00000034210}; SubName: Full=RCG59548 {ECO:0000313|EMBL:EDM16460.1} OS=Rattus norvegicus (Rat)
	P97886_RAT	60210	16	SubName: Full=UDP-glucuronosyltransferase {ECO:0000313|EMBL:BAA18960.1}; SubName: Full=UDP-glucuronosyltransferase 1A6 {ECO:0000313|EMBL:AAL67853.1} OS=Rattus norvegicus (Rat)
	RDH7_RAT	35713	12	RecName: Full=Retinol dehydrogenase 7; EC=1.1.1.105; AltName: Full=Retinol dehydrogenase type III; Short=RODH III OS=Rattus norvegicus (Rat)
	CP4A2_RAT	57932	18	RecName: Full=Cytochrome P450 4A2; AltName: Full=CYPIVA2; AltName: Full=Cytochrome P-450 K-2; AltName: Full=Cytochrome P450 K-5; AltName: Full=Cytochrome P450-LA-omega 2; AltName: Full=Lauric acid omega-hydroxylase; EC=1.14.15.3; Flags: Precursor OS
	ADT2_RAT	32880	16	RecName: Full=ADP/ATP translocase 2; AltName: Full=ADP
	F1LP50_RAT	37044	12	SubName: Full=Protein LOC100362350 {ECO:0000313|Ensembl:ENSRNOP00000031599}; Flags: Fragment OS=Rattus norvegicus (Rat)
	DHE3_RAT	61377	16	RecName: Full=Glutamate dehydrogenase 1
	THIM_RAT	41844	16	RecName: Full=3-ketoacyl-CoA thiolase
	B5AMZ7_RAT	56120	13	SubName: Full=Cytochrome P450 2C22 {ECO:0000313|EMBL:ACF77018.1}; SubName: Full=Cytochrome P450
	PHB2_RAT	33292	13	RecName: Full=Prohibitin-2; AltName: Full=B-cell receptor-associated protein BAP37; Short=BAP-37 OS=Rattus norvegicus (Rat)
	G3V7C6_RAT	49799	13	SubName: Full=RCG45400 {ECO:0000313|EMBL:EDL93630.1}; SubName: Full=Tubulin beta-4B chain {ECO:0000313|Ensembl:ENSRNOP00000013863} OS=Rattus norvegicus (Rat)
	QCR1_RAT	52815	15	RecName: Full=Cytochrome b-c1 complex subunit 1
	D3ZAN3_RAT	90515	18	SubName: Full=Alpha glucosidase 2 alpha neutral subunit (Predicted) {ECO:0000313|EMBL:EDM12754.1}; SubName: Full=Protein Ganab {ECO:0000313|Ensembl:ENSRNOP00000036123} OS=Rattus norvegicus (Rat)
	HS90B_RAT	83229	17	RecName: Full=Heat shock protein HSP 90-beta; AltName: Full=Heat shock 84 kDa; Short=HSP 84; Short=HSP84 OS=Rattus norvegicus (Rat)
	GBLP_RAT	35055	11	RecName: Full=Guanine nucleotide-binding protein subunit beta-2-like 1; AltName: Full=Receptor for activated C kinase; AltName: Full=Receptor of activated protein kinase C 1; Short=RACK1; Contains: RecName: Full=Guanine nucleotide-binding protein su
	CALR_RAT	47966	13	RecName: Full=Calreticulin; AltName: Full=CALBP; AltName: Full=CRP55; AltName: Full=Calcium-binding protein 3; Short=CABP3; AltName: Full=Calregulin; AltName: Full=Endoplasmic reticulum resident protein 60; Short=ERp60; AltName: Full=HACBP; Flags: P
	ADH1_RAT	39620	14	RecName: Full=Alcohol dehydrogenase 1; EC=1.1.1.1; AltName: Full=Alcohol dehydrogenase A subunit OS=Rattus norvegicus (Rat)
	CP2CN_RAT	56397	14	RecName: Full=Cytochrome P450 2C23; EC=1.14.14.1; AltName: Full=Arachidonic acid epoxygenase; AltName: Full=CYPIIC23 OS=Rattus norvegicus (Rat)
	NB5R3_RAT	34153	13	RecName: Full=NADH-cytochrome b5 reductase 3; Short=B5R; Short=Cytochrome b5 reductase; EC=1.6.2.2; AltName: Full=Diaphorase-1; Contains: RecName: Full=NADH-cytochrome b5 reductase 3 membrane-bound form; Contains: RecName: Full=NADH-cytochrome b5 re
	CP4AE_RAT	58195	17	RecName: Full=Cytochrome P450 4A14; AltName: Full=CYPIVA14; AltName: Full=Cytochrome P450-LA-omega 3; AltName: Full=Lauric acid omega-hydroxylase; EC=1.14.15.3; Flags: Precursor OS=Rattus norvegicus (Rat)
	B0BMW2_RAT	27233	13	SubName: Full=3-hydroxyacyl-CoA dehydrogenase type-2 {ECO:0000313|Ensembl:ENSRNOP00000043608}; SubName: Full=Hydroxyacyl-Coenzyme A dehydrogenase type II {ECO:0000313|EMBL:EDL86310.1}; SubName: Full=Hydroxysteroid (17-beta) dehydrogenase 10 {ECO:000
	F1M7N8_RAT	60555	15	SubName: Full=Protein LOC102550717 {ECO:0000313|Ensembl:ENSRNOP00000045002} OS=Rattus norvegicus (Rat)
	DHB13_RAT	33473	17	RecName: Full=17-beta-hydroxysteroid dehydrogenase 13; Short=17-beta-HSD 13; EC=1.1.-.-; AltName: Full=Short-chain dehydrogenase/reductase 9; Flags: Precursor OS=Rattus norvegicus (Rat)
	ECHP_RAT	78608	19	RecName: Full=Peroxisomal bifunctional enzyme; Short=PBE; Short=PBFE; Includes: RecName: Full=Enoyl-CoA hydratase/3
	Q5DT04_RAT	59624	9	SubName: Full=RCG55639
	ALDH2_RAT	56453	18	RecName: Full=Aldehyde dehydrogenase
	MGST1_RAT	17460	8	RecName: Full=Microsomal glutathione S-transferase 1; Short=Microsomal GST-1; EC=2.5.1.18; AltName: Full=Microsomal GST-I OS=Rattus norvegicus (Rat)
	G3V9U2_RAT	41757	15	SubName: Full=3-ketoacyl-CoA thiolase
	AL3A2_RAT	54047	16	RecName: Full=Fatty aldehyde dehydrogenase; EC=1.2.1.3; AltName: Full=Aldehyde dehydrogenase 4; AltName: Full=Aldehyde dehydrogenase family 3 member A2; AltName: Full=Microsomal aldehyde dehydrogenase; Short=msALDH OS=Rattus norvegicus (Rat)
	PGRC1_RAT	21585	8	RecName: Full=Membrane-associated progesterone receptor component 1; AltName: Full=25-DX; AltName: Full=Acidic 25 kDa protein; AltName: Full=Ventral midline antigen; Short=VEMA OS=Rattus norvegicus (Rat)
	HMCS2_RAT	56876	14	RecName: Full=Hydroxymethylglutaryl-CoA synthase
	HSP7C_RAT	70827	12	RecName: Full=Heat shock cognate 71 kDa protein; AltName: Full=Heat shock 70 kDa protein 8 OS=Rattus norvegicus (Rat)
	BAAT_RAT	46435	9	RecName: Full=Bile acid-CoA:amino acid N-acyltransferase; Short=BACAT; Short=BAT; EC=2.3.1.65; AltName: Full=Glycine N-choloyltransferase; AltName: Full=Kan-1; AltName: Full=Long-chain fatty-acyl-CoA hydrolase; EC=3.1.2.2 OS=Rattus norvegicus (Rat)
	Q8VD45_RAT	59974	10	SubName: Full=UDP-glucuronosyltransferase 1A5 {ECO:0000313|EMBL:AAL67850.1} OS=Rattus norvegicus (Rat)
	FMO5_RAT	60017	13	RecName: Full=Dimethylaniline monooxygenase [N-oxide-forming] 5; EC=1.14.13.8; AltName: Full=Dimethylaniline oxidase 5; AltName: Full=Hepatic flavin-containing monooxygenase 5; Short=FMO 5 OS=Rattus norvegicus (Rat)
	TBB5_RAT	49639	12	RecName: Full=Tubulin beta-5 chain OS=Rattus norvegicus (Rat)
	MIC60_RAT	67135	12	RecName: Full=MICOS complex subunit Mic60; AltName: Full=Mitochondrial inner membrane protein {ECO:0000250|UniProtKB:Q8CAQ8
	FAAH1_RAT	63316	11	RecName: Full=Fatty-acid amide hydrolase 1; EC=3.5.1.99; AltName: Full=Anandamide amidohydrolase 1; AltName: Full=Oleamide hydrolase 1 OS=Rattus norvegicus (Rat)
	CYB5_RAT	15346	6	RecName: Full=Cytochrome b5 OS=Rattus norvegicus (Rat)
	UDB37_RAT	60553	14	RecName: Full=UDP-glucuronosyltransferase 2B37; Short=UDPGT 2B37; EC=2.4.1.17; AltName: Full=17-beta-hydroxysteroid-specific UDPGT; AltName: Full=UDP-glucuronosyltransferase R-21; Short=UDPGTr-21; AltName: Full=UDPGTr-5; Flags: Precursor OS=Rattus n
	Q68G49_RAT	62114	10	RecName: Full=Carboxylic ester hydrolase {ECO:0000256|RuleBase:RU361235}; EC=3.1.1.- {ECO:0000256|RuleBase:RU361235} OS=Rattus norvegicus (Rat)
	UDB17_RAT	60485	15	RecName: Full=UDP-glucuronosyltransferase 2B17; Short=UDPGT 2B17; EC=2.4.1.17; AltName: Full=17-beta-hydroxysteroid-specific UDPGT; AltName: Full=RLUG38; AltName: Full=Testosterone
	TBB2A_RAT	49875	13	RecName: Full=Tubulin beta-2A chain OS=Rattus norvegicus (Rat)
	Q5BJZ3_RAT	113796	15	SubName: Full=Nicotinamide nucleotide transhydrogenase {ECO:0000313|EMBL:AAH91271.1}; SubName: Full=Protein Nnt {ECO:0000313|Ensembl:ENSRNOP00000029578} OS=Rattus norvegicus (Rat)
	CP2E1_RAT	56591	19	RecName: Full=Cytochrome P450 2E1; EC=1.14.13.-; AltName: Full=4-nitrophenol 2-hydroxylase; EC=1.14.13.n7; AltName: Full=CYPIIE1; AltName: Full=Cytochrome P450-J; AltName: Full=Cytochrome P450RLM6 OS=Rattus norvegicus (Rat)
	DHB4_RAT	79378	14	RecName: Full=Peroxisomal multifunctional enzyme type 2; Short=MFE-2; AltName: Full=17-beta-hydroxysteroid dehydrogenase 4; Short=17-beta-HSD 4; AltName: Full=D-bifunctional protein; Short=DBP; AltName: Full=Multifunctional protein 2; Short=MPF-2; C
	F1LN88_RAT	56481	18	SubName: Full=Aldehyde dehydrogenase
	FDFT_RAT	48075	12	RecName: Full=Squalene synthase; Short=SQS; Short=SS; EC=2.5.1.21; AltName: Full=FPP:FPP farnesyltransferase; AltName: Full=Farnesyl-diphosphate farnesyltransferase OS=Rattus norvegicus (Rat)
	F1LPF6_RAT	115317	18	RecName: Full=Calcium-transporting ATPase {ECO:0000256|RuleBase:RU361146}; EC=3.6.3.8 {ECO:0000256|RuleBase:RU361146} OS=Rattus norvegicus (Rat)
	F1LPB3_RAT	76478	13	SubName: Full=Long-chain-fatty-acid--CoA ligase 5 {ECO:0000313|Ensembl:ENSRNOP00000022126} OS=Rattus norvegicus (Rat)
	B0K021_RAT	29977	12	SubName: Full=RCG45476
	Q5I0P5_RAT	55804	15	SubName: Full=Cytochrome P450 2C13
	D4ACG2_RAT	72224	12	SubName: Full=IlvB (Bacterial acetolactate synthase)-like (Predicted)
	EST5_RAT	62455	10	RecName: Full=Liver carboxylesterase B-1; EC=3.1.1.1; AltName: Full=Liver microsomal carboxylesterase; Flags: Precursor OS=Rattus norvegicus (Rat)
	RSSA_RAT	32803	6	RecName: Full=40S ribosomal protein SA {ECO:0000255|HAMAP-Rule:MF_03016}; AltName: Full=37 kDa laminin receptor precursor {ECO:0000255|HAMAP-Rule:MF_03016}; Short=37LRP {ECO:0000255|HAMAP-Rule:MF_03016}; AltName: Full=37/67 kDa laminin receptor {ECO
	CP2CD_RAT	55824	15	RecName: Full=Cytochrome P450 2C13
	TBA8_RAT	50006	9	RecName: Full=Tubulin alpha-8 chain; AltName: Full=Alpha-tubulin 8 OS=Rattus norvegicus (Rat)
	HBB2_RAT	15972	12	RecName: Full=Hemoglobin subunit beta-2; AltName: Full=Beta-2-globin; AltName: Full=Hemoglobin beta chain
	Q66HT1_RAT	39500	11	RecName: Full=Fructose-bisphosphate aldolase {ECO:0000256|RuleBase:RU003994
	PLMN_RAT	90477	13	RecName: Full=Plasminogen; EC=3.4.21.7; Contains: RecName: Full=Plasmin heavy chain A; Contains: RecName: Full=Activation peptide; Contains: RecName: Full=Angiostatin; Contains: RecName: Full=Plasmin heavy chain A
	B5DFA3_RAT	65315	13	SubName: Full=Bucs1 protein {ECO:0000313|EMBL:AAI68985.1} OS=Rattus norvegicus (Rat)
	BDH_RAT	38177	11	RecName: Full=D-beta-hydroxybutyrate dehydrogenase
	G3V7V6_RAT	67434	19	SubName: Full=All-trans-13
	BHMT1_RAT	44948	11	RecName: Full=Betaine--homocysteine S-methyltransferase 1; EC=2.1.1.5 OS=Rattus norvegicus (Rat)
	PON3_RAT	39433	7	RecName: Full=Serum paraoxonase/lactonase 3; EC=3.1.1.2; EC=3.1.1.81; EC=3.1.8.1 OS=Rattus norvegicus (Rat)
	MMSA_RAT	57771	13	RecName: Full=Methylmalonate-semialdehyde dehydrogenase [acylating]
	Q6I7R1_RAT	36378	12	SubName: Full=Dehydrogenase/reductase (SDR family) member 7 {ECO:0000313|EMBL:AAI04714.1}; SubName: Full=Down-regulated in nephrectomized rat kidney #3 {ECO:0000313|EMBL:BAD23896.1}; SubName: Full=Protein Dhrs7l1 {ECO:0000313|Ensembl:ENSRNOP00000036
	F1LNW3_RAT	76698	14	RecName: Full=Acyl-coenzyme A oxidase {ECO:0000256|PIRNR:PIRNR000168} OS=Rattus norvegicus (Rat)
	Q68G32_RAT	60707	8	SubName: Full=Ugt1a7c protein {ECO:0000313|EMBL:AAH78732.1}; Flags: Fragment OS=Rattus norvegicus (Rat)
	NDUS1_RAT	79362	14	RecName: Full=NADH-ubiquinone oxidoreductase 75 kDa subunit
	D3ZXY4_RAT	53464	11	SubName: Full=Protein Aldh8a1 {ECO:0000313|Ensembl:ENSRNOP00000020015} OS=Rattus norvegicus (Rat)
	B0BNG1_RAT	51055	8	SubName: Full=Prodh2 protein {ECO:0000313|EMBL:AAI58807.1} OS=Rattus norvegicus (Rat)
	Q5XIH3_RAT	50699	13	SubName: Full=NADH dehydrogenase (Ubiquinone) flavoprotein 1 {ECO:0000313|EMBL:AAH83709.1}; SubName: Full=NADH dehydrogenase (Ubiquinone) flavoprotein 1
	GSTM4_RAT	25664	8	RecName: Full=Glutathione S-transferase Yb-3; EC=2.5.1.18; AltName: Full=Chain 4; AltName: Full=GST Yb3; AltName: Full=GST class-mu 3 OS=Rattus norvegicus (Rat)
	CAH3_RAT	29413	15	RecName: Full=Carbonic anhydrase 3; EC=4.2.1.1; AltName: Full=Carbonate dehydratase III; AltName: Full=Carbonic anhydrase III; Short=CA-III OS=Rattus norvegicus (Rat)
	O89035_RAT	31434	11	SubName: Full=Mitochondrial dicarboxylate carrier {ECO:0000313|EMBL:CAA11278.1}; SubName: Full=Protein Slc25a10 {ECO:0000313|Ensembl:ENSRNOP00000051846}; SubName: Full=Solute carrier family 25 (Mitochondrial carrier dicarboxylate transporter)
	NDUA9_RAT	42532	11	RecName: Full=NADH dehydrogenase [ubiquinone] 1 alpha subcomplex subunit 9
	F1LP69_RAT	145562	11	SubName: Full=Uncharacterized protein {ECO:0000313|Ensembl:ENSRNOP00000008574} OS=Rattus norvegicus (Rat)
	D3ZSA9_RAT	133359	11	SubName: Full=Protein Nomo1 {ECO:0000313|Ensembl:ENSRNOP00000028680}; SubName: Full=Similar to pM5 protein; DNA segment
	B2RYR8_RAT	24190	7	RecName: Full=40S ribosomal protein S8 {ECO:0000256|RuleBase:RU000669} OS=Rattus norvegicus (Rat)
	CSAD_RAT	55214	10	RecName: Full=Cysteine sulfinic acid decarboxylase; EC=4.1.1.29; AltName: Full=Cysteine-sulfinate decarboxylase; AltName: Full=Sulfinoalanine decarboxylase OS=Rattus norvegicus (Rat)
	F16P1_RAT	39584	9	RecName: Full=Fructose-1
	F1LRA1_RAT	57909	8	SubName: Full=Protein ERGIC-53 {ECO:0000313|Ensembl:ENSRNOP00000035966} OS=Rattus norvegicus (Rat)
	GGLO_RAT	50582	13	RecName: Full=L-gulonolactone oxidase; Short=LGO; EC=1.1.3.8; AltName: Full=L-gulono-gamma-lactone oxidase; Short=GLO OS=Rattus norvegicus (Rat)
	DHI1_RAT	31863	10	RecName: Full=Corticosteroid 11-beta-dehydrogenase isozyme 1; EC=1.1.1.146; AltName: Full=11-beta-hydroxysteroid dehydrogenase 1; Short=11-DH; Short=11-beta-HSD1 OS=Rattus norvegicus (Rat)
	CP4F1_RAT	59830	12	RecName: Full=Cytochrome P450 4F1; EC=1.14.14.1; AltName: Full=CYPIVF1; AltName: Full=Cytochrome P450-A3 OS=Rattus norvegicus (Rat)
	F1LLV6_RAT	62421	8	RecName: Full=Carboxylic ester hydrolase; EC=3.1.1.- OS=Rattus norvegicus (Rat)
	ATPO_RAT	23383	10	RecName: Full=ATP synthase subunit O
	NSDHL_RAT	40386	10	RecName: Full=Sterol-4-alpha-carboxylate 3-dehydrogenase
	F1LZ34_RAT	24486	9	SubName: Full=Uncharacterized protein {ECO:0000313|Ensembl:ENSRNOP00000015190}; Flags: Fragment OS=Rattus norvegicus (Rat)
	METK1_RAT	43670	9	RecName: Full=S-adenosylmethionine synthase isoform type-1; Short=AdoMet synthase 1; EC=2.5.1.6; AltName: Full=Methionine adenosyltransferase 1; Short=MAT 1; AltName: Full=Methionine adenosyltransferase I/III; Short=MAT-I/III OS=Rattus norvegicus (R
	OTC_RAT	39861	8	RecName: Full=Ornithine carbamoyltransferase
	CP2A2_RAT	56309	17	RecName: Full=Cytochrome P450 2A2; EC=1.14.14.1; AltName: Full=CYPIIA2; AltName: Full=Cytochrome P450-UT-4; AltName: Full=Testosterone 15-alpha-hydroxylase OS=Rattus norvegicus (Rat)
	B4F768_RAT	62912	11	SubName: Full=Aldh4a1 protein {ECO:0000313|EMBL:AAI68153.1}; Flags: Fragment OS=Rattus norvegicus (Rat)
	HBA_RAT	15319	8	RecName: Full=Hemoglobin subunit alpha-1/2; AltName: Full=Alpha-1/2-globin; AltName: Full=Hemoglobin alpha-1/2 chain OS=Rattus norvegicus (Rat)
	CALX_RAT	67213	9	RecName: Full=Calnexin; Flags: Precursor OS=Rattus norvegicus (Rat)
	ETFB_RAT	27670	8	RecName: Full=Electron transfer flavoprotein subunit beta; Short=Beta-ETF OS=Rattus norvegicus (Rat)
	RLA0_RAT	34194	10	RecName: Full=60S acidic ribosomal protein P0; AltName: Full=60S ribosomal protein L10E OS=Rattus norvegicus (Rat)
	ANXA6_RAT	75706	17	RecName: Full=Annexin A6; AltName: Full=Annexin VI; AltName: Full=Annexin-6; AltName: Full=Calcium-binding protein 65/67; Short=CBP 65/67 OS=Rattus norvegicus (Rat)
	CPT1A_RAT	88069	13	RecName: Full=Carnitine O-palmitoyltransferase 1
	ACTC_RAT	41992	8	RecName: Full=Actin
	F1LQS3_RAT	33525	8	RecName: Full=60S ribosomal protein L6 {ECO:0000256|RuleBase:RU000662} OS=Rattus norvegicus (Rat)
	D4A132_RAT	61054	10	SubName: Full=Protein Ugt2b10 {ECO:0000313|Ensembl:ENSRNOP00000002728} OS=Rattus norvegicus (Rat)
	E9PTU4_RAT	227156	9	SubName: Full=Myosin-11 {ECO:0000313|Ensembl:ENSRNOP00000043197} OS=Rattus norvegicus (Rat)
	EST1E_RAT	61675	10	RecName: Full=Carboxylesterase 1E; EC=3.1.1.1; AltName: Full=Carboxyesterase ES-3; AltName: Full=ES-HTEL; AltName: Full=Egasyn; AltName: Full=Liver carboxylesterase 3; AltName: Full=pI 5.5 esterase; Flags: Precursor OS=Rattus norvegicus (Rat)
	PRDX4_RAT	30988	11	RecName: Full=Peroxiredoxin-4; EC=1.11.1.15; AltName: Full=Antioxidant enzyme AOE372; AltName: Full=Peroxiredoxin IV; Short=Prx-IV; AltName: Full=Thioredoxin peroxidase AO372; AltName: Full=Thioredoxin-dependent peroxide reductase A0372; Flags: Prec
	D4A7D7_RAT	89783	12	SubName: Full=Hexose-6-phosphate dehydrogenase (Glucose 1-dehydrogenase) (Predicted)
	CP2A1_RAT	55959	12	RecName: Full=Cytochrome P450 2A1; EC=1.14.14.1; AltName: Full=CYPIIA1; AltName: Full=Cytochrome P450-UT-F; AltName: Full=Steroid hormones 7-alpha-hydroxylase; AltName: Full=Testosterone 7-alpha-hydroxylase OS=Rattus norvegicus (Rat)
	DHB11_RAT	32917	8	RecName: Full=Estradiol 17-beta-dehydrogenase 11; EC=1.1.1.-; AltName: Full=17-beta-hydroxysteroid dehydrogenase 11; Short=17-beta-HSD 11; Short=17bHSD11; Short=17betaHSD11; AltName: Full=17-beta-hydroxysteroid dehydrogenase XI; Short=17-beta-HSD XI
	MDHM_RAT	35661	11	RecName: Full=Malate dehydrogenase
	D3ZFJ6_RAT	60382	9	SubName: Full=Lactamase
	QCR2_RAT	48366	10	RecName: Full=Cytochrome b-c1 complex subunit 2
	M0R757_RAT	50076	7	RecName: Full=Elongation factor 1-alpha {ECO:0000256|RuleBase:RU004060} OS=Rattus norvegicus (Rat)
	HS90A_RAT	84762	10	RecName: Full=Heat shock protein HSP 90-alpha; AltName: Full=Heat shock 86 kDa; Short=HSP 86; Short=HSP86 OS=Rattus norvegicus (Rat)
	VDAC2_RAT	31726	8	RecName: Full=Voltage-dependent anion-selective channel protein 2; Short=VDAC-2; AltName: Full=B36-VDAC; AltName: Full=Outer mitochondrial membrane protein porin 2 OS=Rattus norvegicus (Rat)
	PH4H_RAT	51789	13	RecName: Full=Phenylalanine-4-hydroxylase; Short=PAH; EC=1.14.16.1; AltName: Full=Phe-4-monooxygenase OS=Rattus norvegicus (Rat)
	SUOX_RAT	60768	8	RecName: Full=Sulfite oxidase
	PPIB_RAT	23788	11	RecName: Full=Peptidyl-prolyl cis-trans isomerase B; Short=PPIase B; EC=5.2.1.8; AltName: Full=CYP-S1; AltName: Full=Cyclophilin B; AltName: Full=Rotamase B; AltName: Full=S-cyclophilin; Short=SCYLP; Flags: Precursor OS=Rattus norvegicus (Rat)
	URIC_RAT	34912	10	RecName: Full=Uricase; EC=1.7.3.3; AltName: Full=Urate oxidase OS=Rattus norvegicus (Rat)
	BUP1_RAT	44014	8	RecName: Full=Beta-ureidopropionase; EC=3.5.1.6 {ECO:0000269|PubMed:8449931}; AltName: Full=Beta-alanine synthase; AltName: Full=N-carbamoyl-beta-alanine amidohydrolase OS=Rattus norvegicus (Rat)
	G3V6I4_RAT	37766	10	SubName: Full=Protein Marc1 {ECO:0000313|Ensembl:ENSRNOP00000005459}; SubName: Full=RCG20363
	ECHB_RAT	51382	9	RecName: Full=Trifunctional enzyme subunit beta
	F1M7X5_RAT	84116	8	SubName: Full=Dipeptidyl peptidase 4 {ECO:0000313|Ensembl:ENSRNOP00000045536} OS=Rattus norvegicus (Rat)
	F1LTS8_RAT	51584	10	SubName: Full=Uncharacterized protein {ECO:0000313|Ensembl:ENSRNOP00000034917}; Flags: Fragment OS=Rattus norvegicus (Rat)
	RGN_RAT	33368	9	RecName: Full=Regucalcin; Short=RC; AltName: Full=Gluconolactonase; Short=GNL; EC=3.1.1.17; AltName: Full=Senescence marker protein 30; Short=SMP-30 OS=Rattus norvegicus (Rat)
	KAD2_RAT	26363	7	RecName: Full=Adenylate kinase 2
	Q6P3V9_RAT	47271	10	SubName: Full=60S ribosomal protein L4 {ECO:0000313|Ensembl:ENSRNOP00000013462}; SubName: Full=RCG58071
	B0BNG3_RAT	40367	10	SubName: Full=Lman2 protein {ECO:0000313|EMBL:AAI58809.1}; SubName: Full=Protein Lman2 {ECO:0000313|Ensembl:ENSRNOP00000021638}; SubName: Full=RCG24303
	Q63011_RAT	15896	7	SubName: Full=Zero beta-globin {ECO:0000313|EMBL:AAC60699.1}; Flags: Fragment OS=Rattus norvegicus (Rat)
	AOFA_RAT	59470	14	RecName: Full=Amine oxidase [flavin-containing] A; EC=1.4.3.4; AltName: Full=Monoamine oxidase type A; Short=MAO-A OS=Rattus norvegicus (Rat)
	OST48_RAT	48865	10	RecName: Full=Dolichyl-diphosphooligosaccharide--protein glycosyltransferase 48 kDa subunit; Short=DDOST 48 kDa subunit; Short=Oligosaccharyl transferase 48 kDa subunit; EC=2.4.99.18; Flags: Precursor OS=Rattus norvegicus (Rat)
	B0BN52_RAT	33506	11	SubName: Full=Mitochondrial carrier 2 {ECO:0000313|EMBL:AHO49121.1}; SubName: Full=Mitochondrial carrier homolog 2 (C. elegans) {ECO:0000313|EMBL:AAI58688.1}; SubName: Full=Mitochondrial carrier homolog 2 (C. elegans) (Predicted)
	RAB7A_RAT	23489	8	RecName: Full=Ras-related protein Rab-7a; AltName: Full=Ras-related protein BRL-RAS; AltName: Full=Ras-related protein p23 OS=Rattus norvegicus (Rat)
	AATM_RAT	47284	11	RecName: Full=Aspartate aminotransferase
	Q62669_RAT	16012	7	SubName: Full=Protein Hbb-b1 {ECO:0000313|Ensembl:ENSRNOP00000019914}; SubName: Full=Zero beta-1 globin {ECO:0000313|EMBL:CAA47872.1} OS=Rattus norvegicus (Rat)
	VDAC3_RAT	30778	10	RecName: Full=Voltage-dependent anion-selective channel protein 3; Short=VDAC-3; Short=rVDAC3; AltName: Full=Outer mitochondrial membrane protein porin 3 OS=Rattus norvegicus (Rat)
	THIKA_RAT	43806	8	RecName: Full=3-ketoacyl-CoA thiolase A
	F1M3E3_RAT	60485	8	SubName: Full=Protein LOC100361864 {ECO:0000313|Ensembl:ENSRNOP00000063270} OS=Rattus norvegicus (Rat)
	ABCD3_RAT	75267	8	RecName: Full=ATP-binding cassette sub-family D member 3; AltName: Full=70 kDa peroxisomal membrane protein; Short=PMP70 OS=Rattus norvegicus (Rat)
	DNJC3_RAT	57525	13	RecName: Full=DnaJ homolog subfamily C member 3; AltName: Full=Interferon-induced
	EF2_RAT	95223	14	RecName: Full=Elongation factor 2; Short=EF-2 OS=Rattus norvegicus (Rat)
	D4AEH9_RAT	174220	13	SubName: Full=Amylo-1
	CP3A2_RAT	57694	15	RecName: Full=Cytochrome P450 3A2; EC=1.14.14.1; AltName: Full=CYPIIIA2; AltName: Full=Cytochrome P450-PCN2; AltName: Full=Cytochrome P450/6-beta-A; AltName: Full=Testosterone 6-beta-hydroxylase OS=Rattus norvegicus (Rat)
	G3V728_RAT	33325	8	SubName: Full=4-nitrophenylphosphatase domain and non-neuronal SNAP25-like protein homolog 1 (C. elegans)
	D3ZG43_RAT	30208	8	SubName: Full=NADH dehydrogenase (Ubiquinone) Fe-S protein 3 (Predicted)
	CO4_RAT	192042	10	RecName: Full=Complement C4; Contains: RecName: Full=Complement C4 beta chain; Contains: RecName: Full=Complement C4 alpha chain; Contains: RecName: Full=C4a anaphylatoxin; Contains: RecName: Full=Complement C4 gamma chain; Flags: Precursor OS=Rattu
	RS3_RAT	26657	12	RecName: Full=40S ribosomal protein S3; EC=4.2.99.18 {ECO:0000250|UniProtKB:P23396} OS=Rattus norvegicus (Rat)
	PYGL_RAT	97421	14	RecName: Full=Glycogen phosphorylase
	PRDX6_RAT	24803	5	RecName: Full=Peroxiredoxin-6; EC=1.11.1.15; AltName: Full=1-Cys peroxiredoxin; Short=1-Cys PRX; AltName: Full=Acidic calcium-independent phospholipase A2; Short=aiPLA2; EC=3.1.1.-; AltName: Full=Antioxidant protein 2; AltName: Full=Non-selenium glu
	SARDH_RAT	101376	12	RecName: Full=Sarcosine dehydrogenase
	NDUAA_RAT	40468	11	RecName: Full=NADH dehydrogenase [ubiquinone] 1 alpha subcomplex subunit 10
	F1LQ09_RAT	66153	6	SubName: Full=Protein Atl2 {ECO:0000313|Ensembl:ENSRNOP00000008988} OS=Rattus norvegicus (Rat)
	MOGS_RAT	91814	12	RecName: Full=Mannosyl-oligosaccharide glucosidase; EC=3.2.1.106; AltName: Full=Glycoprotein-processing glucosidase I OS=Rattus norvegicus (Rat)
	M0R4N4_RAT	35920	7	SubName: Full=Uncharacterized protein {ECO:0000313|Ensembl:ENSRNOP00000064322} OS=Rattus norvegicus (Rat)
	F1M6Z1_RAT	509376	13	SubName: Full=Apolipoprotein B-100 {ECO:0000313|Ensembl:ENSRNOP00000007371} OS=Rattus norvegicus (Rat)
	AL9A1_RAT	53618	10	RecName: Full=4-trimethylaminobutyraldehyde dehydrogenase; Short=TMABADH; EC=1.2.1.47; AltName: Full=Aldehyde dehydrogenase family 9 member A1; EC=1.2.1.3 OS=Rattus norvegicus (Rat)
	ATAD3_RAT	66718	9	RecName: Full=ATPase family AAA domain-containing protein 3 OS=Rattus norvegicus (Rat)
	D4A4D5_RAT	11699	5	SubName: Full=Protein LOC100362751 {ECO:0000313|Ensembl:ENSRNOP00000054740} OS=Rattus norvegicus (Rat)
	ECI2_RAT	42994	6	RecName: Full=Enoyl-CoA delta isomerase 2
	DHB2_RAT	41939	8	RecName: Full=Estradiol 17-beta-dehydrogenase 2; EC=1.1.1.62; AltName: Full=17-beta-hydroxysteroid dehydrogenase type 2; Short=17-beta-HSD 2; AltName: Full=Testosterone 17-beta-dehydrogenase; EC=1.1.1.239 OS=Rattus norvegicus (Rat)
	GSTA3_RAT	25303	10	RecName: Full=Glutathione S-transferase alpha-3; EC=2.5.1.18; AltName: Full=GST 2-2; AltName: Full=GST A3-3; AltName: Full=GST AA; AltName: Full=Glutathione S-transferase Yc-1; Short=GST Yc1 OS=Rattus norvegicus (Rat)
	CP51A_RAT	56670	12	RecName: Full=Lanosterol 14-alpha demethylase; Short=LDM; EC=1.14.13.70; AltName: Full=CYPLI; AltName: Full=Cytochrome P450 51A1; AltName: Full=Cytochrome P450-14DM; Short=Cytochrome P45014DM; AltName: Full=Cytochrome P450LI; AltName: Full=Sterol 14
	D4A9Q3_RAT	15724	5	SubName: Full=Protein RGD1563570 {ECO:0000313|Ensembl:ENSRNOP00000040548} OS=Rattus norvegicus (Rat)
	D3ZZC1_RAT	46324	7	SubName: Full=Protein Txndc5 {ECO:0000313|Ensembl:ENSRNOP00000018310}; SubName: Full=RCG43947 {ECO:0000313|EMBL:EDL98253.1} OS=Rattus norvegicus (Rat)
	AL7A1_RAT	58711	6	RecName: Full=Alpha-aminoadipic semialdehyde dehydrogenase; Short=Alpha-AASA dehydrogenase; EC=1.2.1.31; AltName: Full=Aldehyde dehydrogenase family 7 member A1; EC=1.2.1.3; AltName: Full=Antiquitin-1; AltName: Full=Betaine aldehyde dehydrogenase; E
	A0JN30_RAT	20696	7	SubName: Full=Canopy 2 homolog (Zebrafish) {ECO:0000313|EMBL:AAI26102.1}; SubName: Full=Protein Cnpy2 {ECO:0000313|Ensembl:ENSRNOP00000004895}; SubName: Full=RCG42492 {ECO:0000313|EMBL:EDL84873.1} OS=Rattus norvegicus (Rat)
	G3V9D3_RAT	88468	4	SubName: Full=Protein sel-1 homolog 1 {ECO:0000313|Ensembl:ENSRNOP00000043232}; SubName: Full=Sel1 (Suppressor of lin-12) 1 homolog (C. elegans)
	FTCD_RAT	58877	7	RecName: Full=Formimidoyltransferase-cyclodeaminase; AltName: Full=58 kDa microtubule-binding protein; AltName: Full=Formiminotransferase-cyclodeaminase; Short=FTCD; Includes: RecName: Full=Glutamate formimidoyltransferase; EC=2.1.2.5; AltName: Full
	HPPD_RAT	45084	7	RecName: Full=4-hydroxyphenylpyruvate dioxygenase; EC=1.13.11.27; AltName: Full=4-hydroxyphenylpyruvic acid oxidase; Short=4HPPD; Short=HPD; Short=HPPDase; AltName: Full=F Alloantigen; Short=F protein OS=Rattus norvegicus (Rat)
	M2GD_RAT	95987	6	RecName: Full=Dimethylglycine dehydrogenase
	DHRS4_RAT	29803	7	RecName: Full=Dehydrogenase/reductase SDR family member 4; EC=1.1.1.184; AltName: Full=NADPH-dependent carbonyl reductase/NADP-retinol dehydrogenase; Short=CR; Short=PHCR; AltName: Full=NADPH-dependent retinol dehydrogenase/reductase; Short=NDRD; Al
	THTR_RAT	33386	9	RecName: Full=Thiosulfate sulfurtransferase; EC=2.8.1.1; AltName: Full=Rhodanese OS=Rattus norvegicus (Rat)
	G3V9Y1_RAT	228857	7	SubName: Full=Myosin
	CP3AI_RAT	57270	11	RecName: Full=Cytochrome P450 3A18; EC=1.14.14.1; AltName: Full=CYPIIIA18; AltName: Full=Cytochrome P450(6)beta-2 OS=Rattus norvegicus (Rat)
	SFXN1_RAT	35523	6	RecName: Full=Sideroflexin-1; AltName: Full=Tricarboxylate carrier protein; Short=TCC OS=Rattus norvegicus (Rat)
	NUCB2_RAT	50059	7	RecName: Full=Nucleobindin-2; AltName: Full=DNA-binding protein NEFA; AltName: Full=Prepronesfatin; Contains: RecName: Full=Nesfatin-1; Flags: Precursor OS=Rattus norvegicus (Rat)
	Q6P9U5_RAT	21908	6	SubName: Full=Ribosomal protein L9 {ECO:0000313|EMBL:AAH60589.1} OS=Rattus norvegicus (Rat)
	MUP_RAT	20724	6	RecName: Full=Major urinary protein; Short=MUP; AltName: Full=Allergen Rat n I; AltName: Full=Alpha(2)-euglobulin; AltName: Full=Alpha-2u-globulin; AltName: Full=alpha-2u globulin PGCL1; AltName: Allergen=Rat n 1; Contains: RecName: Full=15.5 kDa fa
	RS3A_RAT	29926	6	RecName: Full=40S ribosomal protein S3a {ECO:0000255|HAMAP-Rule:MF_03122}; AltName: Full=V-fos transformation effector protein; Contains: RecName: Full=40S ribosomal protein S3b OS=Rattus norvegicus (Rat)
	D4A8U5_RAT	117282	9	SubName: Full=Dynamin-like 120 kDa protein
	TPM3_RAT	28989	6	RecName: Full=Tropomyosin alpha-3 chain; AltName: Full=Gamma-tropomyosin; AltName: Full=Tropomyosin-3; AltName: Full=Tropomyosin-5 OS=Rattus norvegicus (Rat)
	PIGR_RAT	84745	8	RecName: Full=Polymeric immunoglobulin receptor; Short=PIgR; Short=Poly-Ig receptor; Contains: RecName: Full=Secretory component; Flags: Precursor OS=Rattus norvegicus (Rat)
	RL3_RAT	46107	8	RecName: Full=60S ribosomal protein L3; AltName: Full=L4 OS=Rattus norvegicus (Rat)
	F1MAR6_RAT	68051	6	SubName: Full=Protein Prodh {ECO:0000313|Ensembl:ENSRNOP00000002576} OS=Rattus norvegicus (Rat)
	S61A1_RAT	52231	7	RecName: Full=Protein transport protein Sec61 subunit alpha isoform 1; Short=Sec61 alpha-1 OS=Rattus norvegicus (Rat)
	F1LR13_RAT	60627	12	SubName: Full=Atlastin-3 {ECO:0000313|Ensembl:ENSRNOP00000063444} OS=Rattus norvegicus (Rat)
	Q5VLR5_RAT	46848	8	SubName: Full=BWK4 {ECO:0000313|EMBL:AAO17785.1}; SubName: Full=Protein Erp44 {ECO:0000313|Ensembl:ENSRNOP00000007711}; SubName: Full=RCG60340 {ECO:0000313|EMBL:EDL78194.1} OS=Rattus norvegicus (Rat)
	TMEDA_RAT	24842	6	RecName: Full=Transmembrane emp24 domain-containing protein 10; AltName: Full=21 kDa transmembrane-trafficking protein; AltName: Full=Transmembrane protein Tmp21; AltName: Full=p24 family protein delta-1; Short=p24delta1; Flags: Precursor OS=Rattus
	FAAA_RAT	45946	5	RecName: Full=Fumarylacetoacetase; Short=FAA; EC=3.7.1.2 {ECO:0000250|UniProtKB:P35505}; AltName: Full=Beta-diketonase; AltName: Full=Fumarylacetoacetate hydrolase OS=Rattus norvegicus (Rat)
	MET7B_RAT	27886	8	RecName: Full=Methyltransferase-like protein 7B; EC=2.1.1.-; AltName: Full=Associated with lipid droplet protein 1; Short=ALDI; Flags: Precursor OS=Rattus norvegicus (Rat)
	DIDH_RAT	37004	9	RecName: Full=3-alpha-hydroxysteroid dehydrogenase; Short=3-alpha-HSD; EC=1.1.1.50; AltName: Full=Hydroxyprostaglandin dehydrogenase OS=Rattus norvegicus (Rat)
	ADT1_RAT	32968	10	RecName: Full=ADP/ATP translocase 1; AltName: Full=ADP
	FAS_RAT	272478	14	RecName: Full=Fatty acid synthase; EC=2.3.1.85; Includes: RecName: Full=[Acyl-carrier-protein] S-acetyltransferase; EC=2.3.1.38; Includes: RecName: Full=[Acyl-carrier-protein] S-malonyltransferase; EC=2.3.1.39; Includes: RecName: Full=3-oxoacyl-[acy
	G3V741_RAT	39505	9	SubName: Full=Phosphate carrier protein
	PON1_RAT	39333	7	RecName: Full=Serum paraoxonase/arylesterase 1; Short=PON 1; EC=3.1.1.2; EC=3.1.1.81; EC=3.1.8.1; AltName: Full=Aromatic esterase 1; Short=A-esterase 1; AltName: Full=Serum aryldialkylphosphatase 1 OS=Rattus norvegicus (Rat)
	ENOA_RAT	47098	8	RecName: Full=Alpha-enolase; EC=4.2.1.11; AltName: Full=2-phospho-D-glycerate hydro-lyase; AltName: Full=Enolase 1; AltName: Full=Non-neural enolase; Short=NNE OS=Rattus norvegicus (Rat)
	SDHB_RAT	31809	9	RecName: Full=Succinate dehydrogenase [ubiquinone] iron-sulfur subunit
	G3V826_RAT	71113	10	RecName: Full=Transketolase {ECO:0000256|RuleBase:RU004996}; EC=2.2.1.1 {ECO:0000256|RuleBase:RU004996} OS=Rattus norvegicus (Rat)
	Q64648_RAT	55858	8	SubName: Full=Cytochrome P450 2C12
	Q4V8I9_RAT	56988	7	SubName: Full=Protein Ugp2 {ECO:0000313|Ensembl:ENSRNOP00000063786}; SubName: Full=UDP-glucose pyrophosphorylase 2 {ECO:0000313|EMBL:AAH97369.1}; SubName: Full=UDP-glucose pyrophosphorylase 2
	Q7TPA1_RAT	36897	6	SubName: Full=Ab1-114 {ECO:0000313|EMBL:AAP92540.1}; SubName: Full=Protein Slc25a15 {ECO:0000313|Ensembl:ENSRNOP00000045952} OS=Rattus norvegicus (Rat)
	LDHA_RAT	36427	11	RecName: Full=L-lactate dehydrogenase A chain; Short=LDH-A; EC=1.1.1.27; AltName: Full=LDH muscle subunit; Short=LDH-M OS=Rattus norvegicus (Rat)
	B1WC34_RAT	59181	7	SubName: Full=Protein Prkcsh {ECO:0000313|Ensembl:ENSRNOP00000018009}; SubName: Full=Protein kinase C substrate 80K-H {ECO:0000313|EMBL:AAI61987.1}; SubName: Full=Protein kinase C substrate 80K-H (Predicted)
	EFTU_RAT	49491	9	RecName: Full=Elongation factor Tu
	Q5PQK5_RAT	68501	9	SubName: Full=Radixin {ECO:0000313|EMBL:AAH87147.1} OS=Rattus norvegicus (Rat)
	M0RCY2_RAT	17762	7	SubName: Full=Protein LOC683961 {ECO:0000313|Ensembl:ENSRNOP00000067470} OS=Rattus norvegicus (Rat)
	A1A5L2_RAT	63310	10	SubName: Full=Pgm1 protein {ECO:0000313|EMBL:AAI28704.1}; Flags: Fragment OS=Rattus norvegicus (Rat)
	HEMO_RAT	51318	11	RecName: Full=Hemopexin; Flags: Precursor OS=Rattus norvegicus (Rat)
	F1LLV5_RAT	48697	6	SubName: Full=Uncharacterized protein {ECO:0000313|Ensembl:ENSRNOP00000050445} OS=Rattus norvegicus (Rat)
	ARGI1_RAT	34951	10	RecName: Full=Arginase-1; EC=3.5.3.1; AltName: Full=Liver-type arginase; AltName: Full=Type I arginase OS=Rattus norvegicus (Rat)
	ACADL_RAT	47842	9	RecName: Full=Long-chain specific acyl-CoA dehydrogenase
	APMAP_RAT	42036	8	RecName: Full=Adipocyte plasma membrane-associated protein OS=Rattus norvegicus (Rat)
	COX5A_RAT	16119	6	RecName: Full=Cytochrome c oxidase subunit 5A
	LRC59_RAT	34848	7	RecName: Full=Leucine-rich repeat-containing protein 59; AltName: Full=Protein p34 OS=Rattus norvegicus (Rat)
	FIBA_RAT	86632	6	RecName: Full=Fibrinogen alpha chain; Contains: RecName: Full=Fibrinopeptide A; Contains: RecName: Full=Fibrinogen alpha chain; Flags: Precursor OS=Rattus norvegicus (Rat)
	AT5F1_RAT	28850	7	RecName: Full=ATP synthase F(0) complex subunit B1
	ACON_RAT	85380	8	RecName: Full=Aconitate hydratase
	Q6AXX5_RAT	35099	5	SubName: Full=Protein Rdh11 {ECO:0000313|Ensembl:ENSRNOP00000015844}; SubName: Full=Retinol dehydrogenase 11 (All-trans/9-cis/11-cis) {ECO:0000313|EMBL:AAH79276.1} OS=Rattus norvegicus (Rat)
	B4F7C9_RAT	80545	9	SubName: Full=Protein Stt3a {ECO:0000313|Ensembl:ENSRNOP00000040087}; SubName: Full=Stt3a protein {ECO:0000313|EMBL:AAI68223.1} OS=Rattus norvegicus (Rat)
	1433Z_RAT	27754	5	RecName: Full=14-3-3 protein zeta/delta; AltName: Full=Mitochondrial import stimulation factor S1 subunit; AltName: Full=Protein kinase C inhibitor protein 1; Short=KCIP-1 OS=Rattus norvegicus (Rat)
	F7FFJ9_RAT	30303	8	RecName: Full=ATP synthase subunit gamma {ECO:0000256|RuleBase:RU004001} OS=Rattus norvegicus (Rat)
	CP4F4_RAT	60011	8	RecName: Full=Cytochrome P450 4F4; EC=1.14.14.1; AltName: Full=CYPIVF4 OS=Rattus norvegicus (Rat)
	DPYS_RAT	56779	8	RecName: Full=Dihydropyrimidinase; Short=DHP; Short=DHPase; EC=3.5.2.2; AltName: Full=Dihydropyrimidine amidohydrolase; AltName: Full=Hydantoinase OS=Rattus norvegicus (Rat)
	NDUA5_RAT	13403	4	RecName: Full=NADH dehydrogenase [ubiquinone] 1 alpha subcomplex subunit 5; AltName: Full=Complex I subunit B13; AltName: Full=Complex I-13kD-B; Short=CI-13kD-B; AltName: Full=NADH-ubiquinone oxidoreductase 13 kDa-B subunit OS=Rattus norvegicus (Rat
	Q9EQS4_RAT	43552	9	SubName: Full=Cystathionase (Cystathionine gamma-lyase) {ECO:0000313|EMBL:AAH78869.1}; SubName: Full=Cystathionine gamma-lyase {ECO:0000313|EMBL:BAB19922.2
	F1M609_RAT	74544	10	RecName: Full=Acyl-coenzyme A oxidase {ECO:0000256|PIRNR:PIRNR000168} OS=Rattus norvegicus (Rat)
	B1WC61_RAT	68800	7	SubName: Full=Acad9 protein {ECO:0000313|EMBL:AAI62016.1}; SubName: Full=Protein Acad9 {ECO:0000313|Ensembl:ENSRNOP00000019108} OS=Rattus norvegicus (Rat)
	B2RYD7_RAT	93376	6	SubName: Full=Protein Stt3b {ECO:0000313|Ensembl:ENSRNOP00000017243}; SubName: Full=RCG25591
	DNJA1_RAT	44839	4	RecName: Full=DnaJ homolog subfamily A member 1; AltName: Full=DnaJ-like protein 1; AltName: Full=Heat shock protein J2; Short=HSJ-2; Flags: Precursor OS=Rattus norvegicus (Rat)
	A0A096MIT3_RAT	33081	7	SubName: Full=Peroxisomal trans-2-enoyl-CoA reductase {ECO:0000313|Ensembl:ENSRNOP00000021512} OS=Rattus norvegicus (Rat)
	RL18_RAT	21645	6	RecName: Full=60S ribosomal protein L18 OS=Rattus norvegicus (Rat)
	M0R660_RAT	35760	7	RecName: Full=Glyceraldehyde-3-phosphate dehydrogenase {ECO:0000256|RuleBase:RU361160}; EC=1.2.1.12 {ECO:0000256|RuleBase:RU361160} OS=Rattus norvegicus (Rat)
	Q6PDV6_RAT	16263	5	SubName: Full=Protein LOC100911847 {ECO:0000313|Ensembl:ENSRNOP00000056260}; SubName: Full=RCG46686
	NDUS2_RAT	52528	7	RecName: Full=NADH dehydrogenase [ubiquinone] iron-sulfur protein 2
	X1WI37_RAT	29448	10	SubName: Full=Protein LOC100362640 {ECO:0000313|Ensembl:ENSRNOP00000004278}; Flags: Fragment OS=Rattus norvegicus (Rat)
	F7EPH4_RAT	32750	2	SubName: Full=Protein Ppa1 {ECO:0000313|Ensembl:ENSRNOP00000000674} OS=Rattus norvegicus (Rat)
	D4A6W6_RAT	28139	7	SubName: Full=Protein RGD1561333 {ECO:0000313|Ensembl:ENSRNOP00000047328} OS=Rattus norvegicus (Rat)
	Q68FY4_RAT	53483	5	SubName: Full=Group specific component {ECO:0000313|EMBL:AAH78891.1}; SubName: Full=Group specific component
	Q6AXY8_RAT	33993	6	SubName: Full=Dehydrogenase/reductase (SDR family) member 1 {ECO:0000313|EMBL:AAH79263.1}; SubName: Full=Dehydrogenase/reductase (SDR family) member 1
	G3V6T1_RAT	138272	10	RecName: Full=Coatomer subunit alpha {ECO:0000256|PIRNR:PIRNR003354} OS=Rattus norvegicus (Rat)
	DHAK_RAT	59406	4	RecName: Full=Bifunctional ATP-dependent dihydroxyacetone kinase/FAD-AMP lyase (cyclizing); Includes: RecName: Full=ATP-dependent dihydroxyacetone kinase; Short=DHA kinase; EC=2.7.1.28; EC=2.7.1.29; AltName: Full=Glycerone kinase; AltName: Full=Trio
	Q5M884_RAT	33665	4	SubName: Full=Protein Eci3 {ECO:0000313|Ensembl:ENSRNOP00000050206}; SubName: Full=Uncharacterized protein {ECO:0000313|EMBL:AAH88178.1} OS=Rattus norvegicus (Rat)
	Q6P6R6_RAT	76887	6	SubName: Full=Transglutaminase 2
	THIL_RAT	44666	4	RecName: Full=Acetyl-CoA acetyltransferase
	F1LRJ9_RAT	52367	9	SubName: Full=Uncharacterized protein {ECO:0000313|Ensembl:ENSRNOP00000064790}; Flags: Fragment OS=Rattus norvegicus (Rat)
	D3ZDW1_RAT	78488	7	SubName: Full=Protein Uroc1 {ECO:0000313|Ensembl:ENSRNOP00000024295} OS=Rattus norvegicus (Rat)
	AOFB_RAT	58421	13	RecName: Full=Amine oxidase [flavin-containing] B; EC=1.4.3.4; AltName: Full=Monoamine oxidase type B; Short=MAO-B OS=Rattus norvegicus (Rat)
	B0BN81_RAT	22892	5	SubName: Full=40S ribosomal protein S5 {ECO:0000313|Ensembl:ENSRNOP00000026528}; SubName: Full=Ribosomal protein S5
	ST1A1_RAT	33884	6	RecName: Full=Sulfotransferase 1A1; Short=ST1A1; EC=2.8.2.1; AltName: Full=Aryl sulfotransferase; AltName: Full=Aryl sulfotransferase IV; Short=ASTIV; AltName: Full=Minoxidil sulfotransferase; Short=Mx-ST; AltName: Full=PST-1; AltName: Full=Phenol s
	FABPL_RAT	14263	7	RecName: Full=Fatty acid-binding protein
	DJB11_RAT	40470	5	RecName: Full=DnaJ homolog subfamily B member 11; AltName: Full=ER-associated DNAJ; AltName: Full=ER-associated Hsp40 co-chaperone; AltName: Full=Endoplasmic reticulum DNA J domain-containing protein 3; Short=ER-resident protein ERdj3; Short=ERdj3;
	D4A8K4_RAT	38922	3	SubName: Full=Protein Tmem82 {ECO:0000313|Ensembl:ENSRNOP00000016176}; SubName: Full=Putative uncharacterized protein RGD1566169_predicted {ECO:0000313|EMBL:EDL80996.1} OS=Rattus norvegicus (Rat)
	PPIA_RAT	17863	7	RecName: Full=Peptidyl-prolyl cis-trans isomerase A; Short=PPIase A; EC=5.2.1.8; AltName: Full=Cyclophilin A; AltName: Full=Cyclosporin A-binding protein; AltName: Full=Rotamase A; AltName: Full=p1B15; AltName: Full=p31; Contains: RecName: Full=Pept
	GLNA_RAT	42240	5	RecName: Full=Glutamine synthetase; Short=GS; EC=6.3.1.2; AltName: Full=Glutamate decarboxylase; EC=4.1.1.15; AltName: Full=Glutamate--ammonia ligase OS=Rattus norvegicus (Rat)
	G3V7K3_RAT	120589	6	SubName: Full=Ceruloplasmin {ECO:0000313|Ensembl:ENSRNOP00000016083}; SubName: Full=Ceruloplasmin
	AK1D1_RAT	37354	8	RecName: Full=3-oxo-5-beta-steroid 4-dehydrogenase; EC=1.3.1.3; AltName: Full=Aldo-keto reductase family 1 member D1; AltName: Full=Delta(4)-3-ketosteroid 5-beta-reductase; AltName: Full=Delta(4)-3-oxosteroid 5-beta-reductase OS=Rattus norvegicus (R
	B0K031_RAT	30294	10	SubName: Full=60S ribosomal protein L7 {ECO:0000313|Ensembl:ENSRNOP00000009431}; SubName: Full=RCG30479
	TPIS_RAT	26832	10	RecName: Full=Triosephosphate isomerase; Short=TIM; EC=5.3.1.1; AltName: Full=Triose-phosphate isomerase OS=Rattus norvegicus (Rat)
	ECHM_RAT	31496	4	RecName: Full=Enoyl-CoA hydratase
	D3ZIL6_RAT	31759	4	SubName: Full=Enoyl Coenzyme A hydratase domain containing 2 (Predicted)
	D3ZM33_RAT	17960	7	SubName: Full=Protein LOC100362298 {ECO:0000313|Ensembl:ENSRNOP00000046090}; Flags: Fragment OS=Rattus norvegicus (Rat)
	AT1A1_RAT	112982	7	RecName: Full=Sodium/potassium-transporting ATPase subunit alpha-1; Short=Na(+)/K(+) ATPase alpha-1 subunit; EC=3.6.3.9; AltName: Full=Sodium pump subunit alpha-1; Flags: Precursor OS=Rattus norvegicus (Rat)
	D3ZCF8_RAT	183940	5	SubName: Full=Protein Abca8 {ECO:0000313|Ensembl:ENSRNOP00000005665} OS=Rattus norvegicus (Rat)
	SND1_RAT	101888	9	RecName: Full=Staphylococcal nuclease domain-containing protein 1; AltName: Full=100 kDa coactivator; AltName: Full=SND p102; AltName: Full=p100 co-activator; AltName: Full=p105 coactivator OS=Rattus norvegicus (Rat)
	B2RYT7_RAT	27776	4	SubName: Full=Haloacid dehalogenase-like hydrolase domain containing 3 {ECO:0000313|EMBL:AAI66898.1}; SubName: Full=Protein Hdhd3 {ECO:0000313|Ensembl:ENSRNOP00000020380}; SubName: Full=RCG55172 {ECO:0000313|EMBL:EDM10554.1} OS=Rattus norvegicus (Ra
	F1M953_RAT	73699	4	SubName: Full=Stress-70 protein
	PON2_RAT	39593	6	RecName: Full=Serum paraoxonase/arylesterase 2; Short=PON 2; EC=3.1.1.2; EC=3.1.1.81; AltName: Full=Aromatic esterase 2; Short=A-esterase 2; AltName: Full=Serum aryldialkylphosphatase 2 OS=Rattus norvegicus (Rat)
	CP2B2_RAT	55897	7	RecName: Full=Cytochrome P450 2B2; EC=1.14.14.1; AltName: Full=CYPIIB2; AltName: Full=Cytochrome P450 PB4; AltName: Full=Cytochrome P450E OS=Rattus norvegicus (Rat)
	D4A9Y0_RAT	23389	3	SubName: Full=Protein Sdf2l1 {ECO:0000313|Ensembl:ENSRNOP00000002540}; SubName: Full=RCG36668 {ECO:0000313|EMBL:EDL77877.1} OS=Rattus norvegicus (Rat)
	UGDH_RAT	54857	3	RecName: Full=UDP-glucose 6-dehydrogenase; Short=UDP-Glc dehydrogenase; Short=UDP-GlcDH; Short=UDPGDH; EC=1.1.1.22 OS=Rattus norvegicus (Rat)
	RL15_RAT	24131	5	RecName: Full=60S ribosomal protein L15 OS=Rattus norvegicus (Rat)
	DHSO_RAT	38210	6	RecName: Full=Sorbitol dehydrogenase; EC=1.1.1.14; AltName: Full=L-iditol 2-dehydrogenase OS=Rattus norvegicus (Rat)
	K1C18_RAT	47732	6	RecName: Full=Keratin
	CP27A_RAT	60695	7	RecName: Full=Sterol 26-hydroxylase
	Q6PED0_RAT	17939	4	SubName: Full=RCG23287
	B2GV28_RAT	55854	7	SubName: Full=Cyp2b1 protein {ECO:0000313|EMBL:AAI66502.1}; SubName: Full=Cytochrome P450 2B1 {ECO:0000313|Ensembl:ENSRNOP00000049925}; SubName: Full=RCG53888 {ECO:0000313|EMBL:EDM07990.1} OS=Rattus norvegicus (Rat)
	ETFA_RAT	34929	6	RecName: Full=Electron transfer flavoprotein subunit alpha
	BHMT2_RAT	39903	6	RecName: Full=S-methylmethionine--homocysteine S-methyltransferase BHMT2; Short=SMM-hcy methyltransferase; EC=2.1.1.10; AltName: Full=Betaine--homocysteine S-methyltransferase 2 OS=Rattus norvegicus (Rat)
	SUCA_RAT	36125	5	RecName: Full=Succinyl-CoA ligase [ADP/GDP-forming] subunit alpha
	FETUA_RAT	37958	6	RecName: Full=Alpha-2-HS-glycoprotein; AltName: Full=59 kDa bone sialic acid-containing protein; Short=BSP; AltName: Full=Fetuin-A; AltName: Full=Glycoprotein PP63; Flags: Precursor OS=Rattus norvegicus (Rat)
	D3ZT90_RAT	49681	4	SubName: Full=Glutaryl-Coenzyme A dehydrogenase (Predicted) {ECO:0000313|EMBL:EDL92192.1}; SubName: Full=Protein Gcdh {ECO:0000313|Ensembl:ENSRNOP00000004570} OS=Rattus norvegicus (Rat)
	ALKMO_RAT	51665	7	RecName: Full=Alkylglycerol monooxygenase; EC=1.14.16.5; AltName: Full=Transmembrane protein 195 OS=Rattus norvegicus (Rat)
	HAOX2_RAT	39176	6	RecName: Full=Hydroxyacid oxidase 2; Short=HAOX2; EC=1.1.3.15; AltName: Full=(S)-2-hydroxy-acid oxidase
	H4_RAT	11360	5	RecName: Full=Histone H4; Contains: RecName: Full=Osteogenic growth peptide; Short=OGP OS=Rattus norvegicus (Rat)
	KMO_RAT	54318	6	RecName: Full=Kynurenine 3-monooxygenase {ECO:0000255|HAMAP-Rule:MF_03018}; EC=1.14.13.9 {ECO:0000255|HAMAP-Rule:MF_03018}; AltName: Full=Kynurenine 3-hydroxylase {ECO:0000255|HAMAP-Rule:MF_03018} OS=Rattus norvegicus (Rat)
	F1LX07_RAT	74181	7	SubName: Full=Protein Slc25a12 {ECO:0000313|Ensembl:ENSRNOP00000032909}; Flags: Fragment OS=Rattus norvegicus (Rat)
	D4ADS4_RAT	16722	4	SubName: Full=Protein Mgst3 {ECO:0000313|Ensembl:ENSRNOP00000005719}; SubName: Full=RCG46430 {ECO:0000313|EMBL:EDM09282.1} OS=Rattus norvegicus (Rat)
	RL19_RAT	23451	4	RecName: Full=60S ribosomal protein L19 OS=Rattus norvegicus (Rat)
	TTHY_RAT	15710	4	RecName: Full=Transthyretin; AltName: Full=Prealbumin; AltName: Full=TBPA; Flags: Precursor OS=Rattus norvegicus (Rat)
	PRDX1_RAT	22095	10	RecName: Full=Peroxiredoxin-1; EC=1.11.1.15; AltName: Full=HBP23; AltName: Full=Heme-binding 23 kDa protein; AltName: Full=Thioredoxin peroxidase 2; AltName: Full=Thioredoxin-dependent peroxide reductase 2 OS=Rattus norvegicus (Rat)
	Q5I0M1_RAT	38432	6	SubName: Full=Apolipoprotein H {ECO:0000313|EMBL:EDM06447.1}; SubName: Full=Apolipoprotein H (Beta-2-glycoprotein I) {ECO:0000313|EMBL:AAH88180.1}; SubName: Full=Beta-2-glycoprotein 1 {ECO:0000313|Ensembl:ENSRNOP00000004756} OS=Rattus norvegicus (Ra
	LYRIC_RAT	63931	3	RecName: Full=Protein LYRIC; AltName: Full=Lysine-rich CEACAM1 co-isolated protein; AltName: Full=Metadherin; AltName: Full=Metastasis adhesion protein OS=Rattus norvegicus (Rat)
	C1TC_RAT	100932	9	RecName: Full=C-1-tetrahydrofolate synthase
	G3V6S3_RAT	37041	6	SubName: Full=Calumenin {ECO:0000313|Ensembl:ENSRNOP00000008356}; SubName: Full=RCG28015
	ACADM_RAT	46526	6	RecName: Full=Medium-chain specific acyl-CoA dehydrogenase
	Q6AZ25_RAT	28679	6	SubName: Full=Tropomyosin 1
	D4A0T0_RAT	20845	8	SubName: Full=Protein Ndufb10 {ECO:0000313|Ensembl:ENSRNOP00000019624}; SubName: Full=RCG32945 {ECO:0000313|EMBL:EDM03875.1} OS=Rattus norvegicus (Rat)
	AMPL_RAT	56115	7	RecName: Full=Cytosol aminopeptidase; EC=3.4.11.1; AltName: Full=Leucine aminopeptidase 3; Short=LAP-3; AltName: Full=Leucyl aminopeptidase; AltName: Full=Proline aminopeptidase; EC=3.4.11.5; AltName: Full=Prolyl aminopeptidase OS=Rattus norvegicus
	F1LPB8_RAT	47361	7	SubName: Full=Ectonucleoside triphosphate diphosphohydrolase 5 {ECO:0000313|Ensembl:ENSRNOP00000041026}; SubName: Full=Ectonucleoside triphosphate diphosphohydrolase 5
	SAHH_RAT	47507	11	RecName: Full=Adenosylhomocysteinase; Short=AdoHcyase; EC=3.3.1.1; AltName: Full=S-adenosyl-L-homocysteine hydrolase OS=Rattus norvegicus (Rat)
	COX5B_RAT	13906	4	RecName: Full=Cytochrome c oxidase subunit 5B
	STML2_RAT	38390	7	RecName: Full=Stomatin-like protein 2
	IDHC_RAT	46705	6	RecName: Full=Isocitrate dehydrogenase [NADP] cytoplasmic; Short=IDH; EC=1.1.1.42; AltName: Full=Cytosolic NADP-isocitrate dehydrogenase; AltName: Full=IDP; AltName: Full=NADP(+)-specific ICDH; AltName: Full=Oxalosuccinate decarboxylase OS=Rattus no
	A1AT_RAT	46107	6	RecName: Full=Alpha-1-antiproteinase; AltName: Full=Alpha-1-antitrypsin; AltName: Full=Alpha-1-proteinase inhibitor; AltName: Full=Serpin A1; Flags: Precursor OS=Rattus norvegicus (Rat)
	DOPD_RAT	13125	2	RecName: Full=D-dopachrome decarboxylase; EC=4.1.1.84; AltName: Full=D-dopachrome tautomerase OS=Rattus norvegicus (Rat)
	M0RBX9_RAT	136070	9	SubName: Full=Protein Mia3 {ECO:0000313|Ensembl:ENSRNOP00000067079}; Flags: Fragment OS=Rattus norvegicus (Rat)
	RS11_RAT	18419	4	RecName: Full=40S ribosomal protein S11 OS=Rattus norvegicus (Rat)
	D4A147_RAT	51379	4	SubName: Full=Protein Ugt2a3 {ECO:0000313|Ensembl:ENSRNOP00000002705} OS=Rattus norvegicus (Rat)
	NLTP_RAT	58775	6	RecName: Full=Non-specific lipid-transfer protein; Short=NSL-TP; EC=2.3.1.176; AltName: Full=Propanoyl-CoA C-acyltransferase; AltName: Full=SCP-chi; AltName: Full=SCPX; AltName: Full=Sterol carrier protein 2; Short=SCP-2; AltName: Full=Sterol carrie
	PGK1_RAT	44510	6	RecName: Full=Phosphoglycerate kinase 1; EC=2.7.2.3 OS=Rattus norvegicus (Rat)
	NDKB_RAT	17272	6	RecName: Full=Nucleoside diphosphate kinase B; Short=NDK B; Short=NDP kinase B; EC=2.7.4.6; AltName: Full=Histidine protein kinase NDKB; EC=2.7.13.3; AltName: Full=P18 OS=Rattus norvegicus (Rat)
	TPM4_RAT	28492	5	RecName: Full=Tropomyosin alpha-4 chain; AltName: Full=Tropomyosin-4; Short=TM-4 OS=Rattus norvegicus (Rat)
	TECR_RAT	36099	8	RecName: Full=Very-long-chain enoyl-CoA reductase {ECO:0000305}; EC=1.3.1.93 {ECO:0000250|UniProtKB:Q9NZ01}; AltName: Full=Synaptic glycoprotein SC2; AltName: Full=Trans-2
	D3ZE29_RAT	34477	8	SubName: Full=Uncharacterized protein {ECO:0000313|Ensembl:ENSRNOP00000055173}; Flags: Fragment OS=Rattus norvegicus (Rat)
	Q2MHD8_RAT	34546	6	SubName: Full=Truncated form of 17beta-hydroxysteroid dehydrogenase {ECO:0000313|EMBL:BAE75958.1} OS=Rattus norvegicus (Rat)
	DECR_RAT	36110	6	RecName: Full=2
	D3ZJZ0_RAT	21171	3	SubName: Full=Protein Tmem205 {ECO:0000313|Ensembl:ENSRNOP00000015684}; SubName: Full=RGD1563250 (Predicted)
	PDIA5_RAT	59361	7	RecName: Full=Protein disulfide-isomerase A5; EC=5.3.4.1; Flags: Precursor OS=Rattus norvegicus (Rat)
	PGRC2_RAT	23389	3	RecName: Full=Membrane-associated progesterone receptor component 2 OS=Rattus norvegicus (Rat)
	Q3KR94_RAT	54690	3	SubName: Full=Protein Vtn {ECO:0000313|Ensembl:ENSRNOP00000046415}; SubName: Full=Vitronectin {ECO:0000313|EMBL:AAI05822.1}; SubName: Full=Vitronectin
	SAC1_RAT	66996	9	RecName: Full=Phosphatidylinositide phosphatase SAC1; EC=3.1.3.-; AltName: Full=Suppressor of actin mutations 1-like protein OS=Rattus norvegicus (Rat)
	Q5FVG4_RAT	24624	6	SubName: Full=Protein LOC100911440 {ECO:0000313|Ensembl:ENSRNOP00000025240}; SubName: Full=Solute carrier family 25 (Mitochondrial carrier
	RS19_RAT	16076	5	RecName: Full=40S ribosomal protein S19 OS=Rattus norvegicus (Rat)
	G3V6C2_RAT	49858	6	SubName: Full=Protein Hgd {ECO:0000313|Ensembl:ENSRNOP00000003645}; SubName: Full=RCG52860
	Q5BJN1_RAT	32883	5	SubName: Full=Protein Stard10 {ECO:0000313|Ensembl:ENSRNOP00000026428}; SubName: Full=START domain containing 10
	HACL1_RAT	63575	7	RecName: Full=2-hydroxyacyl-CoA lyase 1; EC=4.1.-.-; AltName: Full=2-hydroxyphytanoyl-CoA lyase; Short=2-HPCL; AltName: Full=Phytanoyl-CoA 2-hydroxylase 2 OS=Rattus norvegicus (Rat)
	MPC1_RAT	12446	2	RecName: Full=Mitochondrial pyruvate carrier 1; AltName: Full=Apoptosis-regulating basic protein; AltName: Full=Brain protein 44-like protein OS=Rattus norvegicus (Rat)
	ERG7_RAT	83247	6	RecName: Full=Lanosterol synthase; EC=5.4.99.7; AltName: Full=2
	Q5FVQ6_RAT	48160	5	SubName: Full=Interferon-gamma-inducible GTPase Ifgga3 protein {ECO:0000313|EMBL:CBY66001.1}; SubName: Full=Protein LOC100910979 {ECO:0000313|Ensembl:ENSRNOP00000049863}; SubName: Full=Similar to interferon-inducible GTPase {ECO:0000313|EMBL:AAH8983
	VAPA_RAT	27823	4	RecName: Full=Vesicle-associated membrane protein-associated protein A; Short=VAMP-A; Short=VAMP-associated protein A; Short=VAP-A; AltName: Full=33 kDa VAMP-associated protein; Short=VAP-33 OS=Rattus norvegicus (Rat)
	B2RYS2_RAT	13550	4	RecName: Full=Cytochrome b-c1 complex subunit 7 {ECO:0000256|PIRNR:PIRNR000022} OS=Rattus norvegicus (Rat)
	UP2_RAT	11060	2	RecName: Full=Urinary protein 2; Short=UP-2; Short=rUP-2; Flags: Precursor OS=Rattus norvegicus (Rat)
	B2GV99_RAT	17002	6	SubName: Full=Myl6 protein {ECO:0000313|EMBL:AAI66586.1} OS=Rattus norvegicus (Rat)
	VAT1_RAT	43091	5	RecName: Full=Synaptic vesicle membrane protein VAT-1 homolog; EC=1.-.-.-; AltName: Full=Mitofusin-binding protein; Short=Protein MIB OS=Rattus norvegicus (Rat)
	F1LM18_RAT	59187	3	SubName: Full=Polypyrimidine tract-binding protein 1 {ECO:0000313|Ensembl:ENSRNOP00000043256} OS=Rattus norvegicus (Rat)
	GNMT_RAT	32528	5	RecName: Full=Glycine N-methyltransferase; EC=2.1.1.20; AltName: Full=Folate-binding protein OS=Rattus norvegicus (Rat)
	ARF1_RAT	20684	4	RecName: Full=ADP-ribosylation factor 1 OS=Rattus norvegicus (Rat)
	Q31257_RAT	39221	6	SubName: Full=RT1.A1(F) protein {ECO:0000313|EMBL:CAA68093.1}; Flags: Fragment OS=Rattus norvegicus (Rat)
	CMBL_RAT	27885	4	RecName: Full=Carboxymethylenebutenolidase homolog; EC=3.1.-.-; AltName: Full=Liver regeneration-related protein LRRG072 OS=Rattus norvegicus (Rat)
	TIM13_RAT	10451	3	RecName: Full=Mitochondrial import inner membrane translocase subunit Tim13 OS=Rattus norvegicus (Rat)
	ATP5H_RAT	18752	4	RecName: Full=ATP synthase subunit d
	B2RYF6_RAT	75229	5	SubName: Full=Cleft lip and palate associated transmembrane protein 1 {ECO:0000313|EMBL:AAI66760.1}; SubName: Full=Cleft lip and palate associated transmembrane protein 1 (Predicted) {ECO:0000313|EMBL:EDM08175.1}; SubName: Full=Protein Clptm1 {ECO:0
	Q6IMX3_RAT	44939	6	SubName: Full=Acetyl-Coenzyme A dehydrogenase
	RL5_RAT	34437	4	RecName: Full=60S ribosomal protein L5 OS=Rattus norvegicus (Rat)
	REEP6_RAT	23298	3	RecName: Full=Receptor expression-enhancing protein 6; AltName: Full=Polyposis locus protein 1-like 1 OS=Rattus norvegicus (Rat)
	Q5M7X1_RAT	102396	6	SubName: Full=Coatomer protein complex
	Q5RKJ9_RAT	22527	2	SubName: Full=RAB10
	CP4V2_RAT	60541	8	RecName: Full=Cytochrome P450 4V2; EC=1.14.13.-; AltName: Full=Docosahexaenoic acid omega-hydroxylase CYP4V2 {ECO:0000305}; EC=1.14.13.199 {ECO:0000250|UniProtKB:Q6ZWL3} OS=Rattus norvegicus (Rat)
	D3ZD09_RAT	10065	4	SubName: Full=Cytochrome c oxidase subunit 6B1 {ECO:0000313|Ensembl:ENSRNOP00000048723} OS=Rattus norvegicus (Rat)
	M2OM_RAT	34222	9	RecName: Full=Mitochondrial 2-oxoglutarate/malate carrier protein; Short=OGCP; AltName: Full=Solute carrier family 25 member 11 OS=Rattus norvegicus (Rat)
	LETM1_RAT	83008	8	RecName: Full=LETM1 and EF-hand domain-containing protein 1
	D3Z900_RAT	38215	8	SubName: Full=Mitochondrial amidoxime reducing component 2 {ECO:0000313|Ensembl:ENSRNOP00000034963}; SubName: Full=RCG20112 {ECO:0000313|EMBL:EDL94903.1} OS=Rattus norvegicus (Rat)
	D3ZPU3_RAT	32105	5	SubName: Full=Very-long-chain 3-oxoacyl-CoA reductase {ECO:0000313|Ensembl:ENSRNOP00000041197} OS=Rattus norvegicus (Rat)
	UCRI_RAT	29427	6	RecName: Full=Cytochrome b-c1 complex subunit Rieske
	Q7TP91_RAT	83209	3	SubName: Full=Ab1-205 {ECO:0000313|EMBL:AAP92551.1} OS=Rattus norvegicus (Rat)
	SSRD_RAT	18968	4	RecName: Full=Translocon-associated protein subunit delta; Short=TRAP-delta; AltName: Full=Signal sequence receptor subunit delta; Short=SSR-delta; Flags: Precursor OS=Rattus norvegicus (Rat)
	Q3KRE2_RAT	28123	4	SubName: Full=Methyltransferase like 7A {ECO:0000313|EMBL:AAI05761.1}; SubName: Full=Methyltransferase like 7A
	RMD2_RAT	47187	3	RecName: Full=Regulator of microtubule dynamics protein 2; Short=RMD-2; AltName: Full=Protein FAM82A1 OS=Rattus norvegicus (Rat)
	SPA3L_RAT	46248	3	RecName: Full=Serine protease inhibitor A3L; Short=Serpin A3L; AltName: Full=CPI-23; AltName: Full=Contrapsin-like protease inhibitor 3; AltName: Full=Serine protease inhibitor 1; Short=SPI-1; Flags: Precursor OS=Rattus norvegicus (Rat)
	D3ZM21_RAT	28969	5	SubName: Full=Catechol-O-methyltransferase domain containing 1 (Predicted)
	DLDH_RAT	54004	6	RecName: Full=Dihydrolipoyl dehydrogenase
	NDUV2_RAT	27361	5	RecName: Full=NADH dehydrogenase [ubiquinone] flavoprotein 2
	TMED7_RAT	25463	5	RecName: Full=Transmembrane emp24 domain-containing protein 7; AltName: Full=p24 family protein gamma-3; Short=p24gamma3; AltName: Full=p27; Flags: Precursor OS=Rattus norvegicus (Rat)
	FADS2_RAT	52347	7	RecName: Full=Fatty acid desaturase 2; EC=1.14.19.-; AltName: Full=Delta(6) fatty acid desaturase; Short=D6D; Short=Delta(6) desaturase; Short=Delta-6 desaturase OS=Rattus norvegicus (Rat)
	RS6_RAT	28663	5	RecName: Full=40S ribosomal protein S6 OS=Rattus norvegicus (Rat)
	SPEB_RAT	37963	6	RecName: Full=Agmatinase
	Q65ZS7_RAT	38302	4	SubName: Full=Rat apolipoprotein E protein {ECO:0000313|EMBL:AAA40756.1}; Flags: Precursor OS=Rattus norvegicus (Rat)
	SPA3K_RAT	46532	6	RecName: Full=Serine protease inhibitor A3K; Short=Serpin A3K; AltName: Full=CPI-21; AltName: Full=Contrapsin-like protease inhibitor 1; AltName: Full=GHR-P63; AltName: Full=Growth hormone-regulated proteinase inhibitor; AltName: Full=Kallikrein-bin
	Q5U3Z7_RAT	55730	4	RecName: Full=Serine hydroxymethyltransferase {ECO:0000256|RuleBase:RU000585}; EC=2.1.2.1 {ECO:0000256|RuleBase:RU000585} OS=Rattus norvegicus (Rat)
	UP3_RAT	11092	2	RecName: Full=Urinary protein 3; Short=UP-3; Short=rUP-3; Flags: Precursor OS=Rattus norvegicus (Rat)
	D4A2K1_RAT	34443	4	SubName: Full=Protein Hoga1 {ECO:0000313|Ensembl:ENSRNOP00000047674}; SubName: Full=Similar to RIKEN cDNA 0610010D20 (Predicted) {ECO:0000313|EMBL:EDL94226.1} OS=Rattus norvegicus (Rat)
	B6DTP5_RAT	69069	4	SubName: Full=DEAD (Asp-Glu-Ala-Asp) box polypeptide 5 {ECO:0000313|EMBL:ACI04543.1}; Flags: Fragment OS=Rattus norvegicus (Rat)
	PCCA_RAT	81571	5	RecName: Full=Propionyl-CoA carboxylase alpha chain
	HNRH1_RAT	49157	3	RecName: Full=Heterogeneous nuclear ribonucleoprotein H; Short=hnRNP H; AltName: Full=Ratsg1; Contains: RecName: Full=Heterogeneous nuclear ribonucleoprotein H
	Q7TPJ1_RAT	161531	5	SubName: Full=Ac2-233 {ECO:0000313|EMBL:AAP86276.1} OS=Rattus norvegicus (Rat)
	F1M2D3_RAT	30714	6	SubName: Full=Uncharacterized protein {ECO:0000313|Ensembl:ENSRNOP00000063408} OS=Rattus norvegicus (Rat)
	B2RYU2_RAT	17835	5	SubName: Full=RCG45615
	KAT3_RAT	51011	4	RecName: Full=Kynurenine--oxoglutarate transaminase 3; EC=2.6.1.7; AltName: Full=Cysteine-S-conjugate beta-lyase 2; EC=4.4.1.13; AltName: Full=Kynurenine aminotransferase III; Short=KATIII; AltName: Full=Kynurenine--glyoxylate transaminase; EC=2.6.1
	SCPDL_RAT	47058	7	RecName: Full=Saccharopine dehydrogenase-like oxidoreductase; EC=1.-.-.- OS=Rattus norvegicus (Rat)
	THRB_RAT	70367	6	RecName: Full=Prothrombin; EC=3.4.21.5; AltName: Full=Coagulation factor II; Contains: RecName: Full=Activation peptide fragment 1; Contains: RecName: Full=Activation peptide fragment 2; Contains: RecName: Full=Thrombin light chain; Contains: RecNam
	M0RC77_RAT	34347	2	RecName: Full=Kynurenine formamidase {ECO:0000256|HAMAP-Rule:MF_03014}; Short=KFA {ECO:0000256|HAMAP-Rule:MF_03014}; Short=KFase {ECO:0000256|HAMAP-Rule:MF_03014}; EC=3.5.1.9 {ECO:0000256|HAMAP-Rule:MF_03014}; AltName: Full=Arylformamidase {ECO:0000
	F1LZC5_RAT	17037	2	SubName: Full=Protein Ndufa13 {ECO:0000313|Ensembl:ENSRNOP00000034694}; Flags: Fragment OS=Rattus norvegicus (Rat)
	B0K038_RAT	17960	5	SubName: Full=Rps16 protein {ECO:0000313|EMBL:AAI59439.1}; Flags: Fragment OS=Rattus norvegicus (Rat)
	UK114_RAT	14295	5	RecName: Full=Ribonuclease UK114; EC=3.1.-.-; AltName: Full=14.5 kDa translational inhibitor protein; AltName: Full=Perchloric acid soluble protein OS=Rattus norvegicus (Rat)
	D3ZJX5_RAT	39830	4	SubName: Full=Protein LOC687295 {ECO:0000313|Ensembl:ENSRNOP00000053926}; SubName: Full=RCG54610
	CCD47_RAT	55697	5	RecName: Full=Coiled-coil domain-containing protein 47; Flags: Precursor OS=Rattus norvegicus (Rat)
	D3ZLL8_RAT	14845	3	SubName: Full=Protein LOC100909878 {ECO:0000313|Ensembl:ENSRNOP00000046737} OS=Rattus norvegicus (Rat)
	F1LT35_RAT	17723	7	SubName: Full=Protein RGD1564606 {ECO:0000313|Ensembl:ENSRNOP00000043004}; Flags: Fragment OS=Rattus norvegicus (Rat)
	D4A2Z6_RAT	83539	5	SubName: Full=Protein Sec63 {ECO:0000313|Ensembl:ENSRNOP00000035059}; SubName: Full=SEC63-like (S. cerevisiae) (Predicted) {ECO:0000313|EMBL:EDL99699.1} OS=Rattus norvegicus (Rat)
	D3ZXC8_RAT	23396	1	SubName: Full=Emopamil binding protein-like (Predicted)
	GSTA2_RAT	25543	7	RecName: Full=Glutathione S-transferase alpha-2; EC=2.5.1.18; AltName: Full=GST 1b-1b; AltName: Full=GST A2-2; AltName: Full=Glutathione S-transferase Ya-2; Short=GST Ya2 OS=Rattus norvegicus (Rat)
	AMYP_RAT	57141	5	RecName: Full=Pancreatic alpha-amylase; Short=PA; EC=3.2.1.1; AltName: Full=1
	F1LTX8_RAT	42961	4	SubName: Full=Protein Lpgat1 {ECO:0000313|Ensembl:ENSRNOP00000062474}; SubName: Full=RCG20137 {ECO:0000313|EMBL:EDL95007.1} OS=Rattus norvegicus (Rat)
	B1WBN9_RAT	58757	6	RecName: Full=Pyruvate kinase {ECO:0000256|RuleBase:RU000504}; EC=2.7.1.40 {ECO:0000256|RuleBase:RU000504} OS=Rattus norvegicus (Rat)
	MYO1B_RAT	131835	5	RecName: Full=Unconventional myosin-Ib; AltName: Full=Myosin I alpha; Short=MMI-alpha; Short=MMIa; AltName: Full=Myosin heavy chain myr 1 OS=Rattus norvegicus (Rat)
	Q5XI86_RAT	19517	3	SubName: Full=Peptidyl-tRNA hydrolase 2 {ECO:0000313|EMBL:AAH83801.1}; SubName: Full=Protein Ptrh2 {ECO:0000313|Ensembl:ENSRNOP00000005661}; SubName: Full=Similar to A230072I16Rik protein
	D3ZCZ9_RAT	13032	4	SubName: Full=Protein LOC100912599 {ECO:0000313|Ensembl:ENSRNOP00000036045}; SubName: Full=RCG41951
	MBL2_RAT	25998	3	RecName: Full=Mannose-binding protein C; Short=MBP-C; AltName: Full=Mannan-binding protein; AltName: Full=Ra-reactive factor polysaccharide-binding component p28A; Short=RaRF p28A; Flags: Precursor OS=Rattus norvegicus (Rat)
	ERLN2_RAT	37686	4	RecName: Full=Erlin-2 {ECO:0000250|UniProtKB:Q8BFZ9}; AltName: Full=Endoplasmic reticulum lipid raft-associated protein 2 {ECO:0000250|UniProtKB:Q8BFZ9
	O55211_RAT	28118	7	SubName: Full=Ribosomal protein S2 {ECO:0000313|EMBL:AAC04621.1} OS=Rattus norvegicus (Rat)
	AK1A1_RAT	36483	5	RecName: Full=Alcohol dehydrogenase [NADP(+)]; EC=1.1.1.2; AltName: Full=3-DG-reducing enzyme; AltName: Full=Aldehyde reductase; AltName: Full=Aldo-keto reductase family 1 member A1 OS=Rattus norvegicus (Rat)
	FADS1_RAT	52448	7	RecName: Full=Fatty acid desaturase 1; EC=1.14.19.-; AltName: Full=Delta(5) fatty acid desaturase; Short=D5D; Short=Delta(5) desaturase; Short=Delta-5 desaturase OS=Rattus norvegicus (Rat)
	B0BNE6_RAT	23955	3	SubName: Full=NADH dehydrogenase (Ubiquinone) Fe-S protein 8 (Predicted)
	G3V6K6_RAT	134809	6	RecName: Full=Receptor protein-tyrosine kinase {ECO:0000256|SAAS:SAAS00067536}; EC=2.7.10.1 {ECO:0000256|SAAS:SAAS00067536} OS=Rattus norvegicus (Rat)
	FINC_RAT	272341	4	RecName: Full=Fibronectin; Short=FN; Contains: RecName: Full=Anastellin; Flags: Precursor OS=Rattus norvegicus (Rat)
	D3ZUU8_RAT	46988	3	SubName: Full=Protein Sec14l4 {ECO:0000313|Ensembl:ENSRNOP00000006053}; SubName: Full=Similar to SEC14 (S. cerevisiae)-like 2 (Predicted)
	Q6QI47_RAT	50942	3	SubName: Full=LRRGT00161 {ECO:0000313|EMBL:AAS66252.1} OS=Rattus norvegicus (Rat)
	G3V6H0_RAT	22163	4	SubName: Full=Protein LOC100363782 {ECO:0000313|Ensembl:ENSRNOP00000067788}; SubName: Full=RCG48149
	NCLN_RAT	62952	4	RecName: Full=Nicalin; AltName: Full=Nicastrin-like protein; Flags: Precursor OS=Rattus norvegicus (Rat)
	ENPP1_RAT	102876	4	RecName: Full=Ectonucleotide pyrophosphatase/phosphodiesterase family member 1; Short=E-NPP 1; AltName: Full=Phosphodiesterase I/nucleotide pyrophosphatase 1; AltName: Full=Plasma-cell membrane glycoprotein PC-1; Includes: RecName: Full=Alkaline pho
	M0R6J9_RAT	35984	3	SubName: Full=Heterogeneous nuclear ribonucleoproteins A2/B1 {ECO:0000313|Ensembl:ENSRNOP00000065051}; SubName: Full=RCG52521
	HEM2_RAT	36008	2	RecName: Full=Delta-aminolevulinic acid dehydratase; Short=ALADH; EC=4.2.1.24; AltName: Full=Porphobilinogen synthase OS=Rattus norvegicus (Rat)
	D4A994_RAT	111115	7	SubName: Full=Protein Emc1 {ECO:0000313|Ensembl:ENSRNOP00000061588}; SubName: Full=Similar to KIAA0090 protein (Predicted)
	D4AE56_RAT	43424	3	SubName: Full=Prostaglandin E synthase 2 (Predicted)
	RAB18_RAT	22962	5	RecName: Full=Ras-related protein Rab-18; Flags: Precursor OS=Rattus norvegicus (Rat)
	G3V852_RAT	269504	4	SubName: Full=Protein Tln1 {ECO:0000313|Ensembl:ENSRNOP00000022401}; SubName: Full=RCG55135
	D3ZD11_RAT	24958	5	SubName: Full=Protein Spcs2 {ECO:0000313|Ensembl:ENSRNOP00000024772} OS=Rattus norvegicus (Rat)
	CPT2_RAT	74063	8	RecName: Full=Carnitine O-palmitoyltransferase 2
	RL10A_RAT	24816	8	RecName: Full=60S ribosomal protein L10a OS=Rattus norvegicus (Rat)
	MAAI_RAT	23946	3	RecName: Full=Maleylacetoacetate isomerase; Short=MAAI; EC=5.2.1.2; AltName: Full=GSTZ1-1; AltName: Full=Glutathione S-transferase zeta 1; EC=2.5.1.18 OS=Rattus norvegicus (Rat)
	MLEC_RAT	32398	6	RecName: Full=Malectin; Flags: Precursor OS=Rattus norvegicus (Rat)
	A0A096P6L8_RAT	209398	3	SubName: Full=Fibronectin {ECO:0000313|Ensembl:ENSRNOP00000019772} OS=Rattus norvegicus (Rat)
	ESYT1_RAT	121084	4	RecName: Full=Extended synaptotagmin-1; Short=E-Syt1; AltName: Full=Membrane-bound C2 domain-containing protein; AltName: Full=vp115 OS=Rattus norvegicus (Rat)
	A0A096MKG5_RAT	50623	4	SubName: Full=NAD kinase 2
	A0JPM7_RAT	25806	4	RecName: Full=Ferritin {ECO:0000256|RuleBase:RU361145}; Flags: Fragment OS=Rattus norvegicus (Rat)
	ADK_RAT	40108	4	RecName: Full=Adenosine kinase; Short=AK; EC=2.7.1.20; AltName: Full=Adenosine 5'-phosphotransferase OS=Rattus norvegicus (Rat)
	D3ZRN3_RAT	41936	4	SubName: Full=Protein Actbl2 {ECO:0000313|Ensembl:ENSRNOP00000059847}; SubName: Full=Similar to cytoplasmic beta-actin (Predicted) {ECO:0000313|EMBL:EDM10336.1} OS=Rattus norvegicus (Rat)
	RAB1A_RAT	22663	4	RecName: Full=Ras-related protein Rab-1A OS=Rattus norvegicus (Rat)
	PNPH_RAT	32281	4	RecName: Full=Purine nucleoside phosphorylase {ECO:0000250|UniProtKB:P00491}; Short=PNP {ECO:0000250|UniProtKB:P00491}; EC=2.4.2.1; AltName: Full=Inosine phosphorylase {ECO:0000250|UniProtKB:P00491}; AltName: Full=Inosine-guanosine phosphorylase OS=
	M0RDM4_RAT	14060	3	RecName: Full=Histone H2A {ECO:0000256|RuleBase:RU000527} OS=Rattus norvegicus (Rat)
	ACD11_RAT	87316	7	RecName: Full=Acyl-CoA dehydrogenase family member 11; Short=ACAD-11; EC=1.3.99.- OS=Rattus norvegicus (Rat)
	M0R535_RAT	31057	1	SubName: Full=Protein RGD1565829 {ECO:0000313|Ensembl:ENSRNOP00000064491}; Flags: Fragment OS=Rattus norvegicus (Rat)
	TRAP1_RAT	80411	5	RecName: Full=Heat shock protein 75 kDa
	B0BNF9_RAT	40942	7	SubName: Full=Hydroxyacid oxidase 1 {ECO:0000313|EMBL:AAI58805.1}; SubName: Full=Hydroxyacid oxidase 1 (Mapped) {ECO:0000313|EMBL:EDL80285.1}; SubName: Full=Protein Hao1 {ECO:0000313|Ensembl:ENSRNOP00000006330} OS=Rattus norvegicus (Rat)
	MANF_RAT	20375	7	RecName: Full=Mesencephalic astrocyte-derived neurotrophic factor; AltName: Full=Arginine-rich protein; AltName: Full=Protein ARMET; Flags: Precursor OS=Rattus norvegicus (Rat)
	CP2A3_RAT	56474	4	RecName: Full=Cytochrome P450 2A3; EC=1.14.14.1; AltName: Full=CYPIIA3; AltName: Full=Coumarin 7-hydroxylase OS=Rattus norvegicus (Rat)
	FIBB_RAT	54201	5	RecName: Full=Fibrinogen beta chain; AltName: Full=Liver regeneration-related protein LRRG036/LRRG043/LRRG189; Contains: RecName: Full=Fibrinopeptide B; Contains: RecName: Full=Fibrinogen beta chain; Flags: Precursor OS=Rattus norvegicus (Rat)
	RL18A_RAT	20719	4	RecName: Full=60S ribosomal protein L18a OS=Rattus norvegicus (Rat)
	B3AT_RAT	103107	4	RecName: Full=Band 3 anion transport protein; AltName: Full=Anion exchange protein 1; Short=AE 1; Short=Anion exchanger 1; AltName: Full=Solute carrier family 4 member 1; AltName: CD_antigen=CD233 OS=Rattus norvegicus (Rat)
	RL27_RAT	15788	3	RecName: Full=60S ribosomal protein L27 OS=Rattus norvegicus (Rat)
	ML12B_RAT	19826	2	RecName: Full=Myosin regulatory light chain 12B; AltName: Full=Myosin RLC-B; AltName: Full=Myosin regulatory light chain 2-B
	Q32Q55_RAT	62370	3	RecName: Full=Carboxylic ester hydrolase {ECO:0000256|RuleBase:RU361235}; EC=3.1.1.- {ECO:0000256|RuleBase:RU361235} OS=Rattus norvegicus (Rat)
	ARLY_RAT	51517	5	RecName: Full=Argininosuccinate lyase; Short=ASAL; EC=4.3.2.1; AltName: Full=Arginosuccinase OS=Rattus norvegicus (Rat)
	RL30_RAT	12776	4	RecName: Full=60S ribosomal protein L30 OS=Rattus norvegicus (Rat)
	B5DEX7_RAT	131374	4	SubName: Full=Atp13a1 protein {ECO:0000313|EMBL:AAI68844.1}; Flags: Fragment OS=Rattus norvegicus (Rat)
	M0R9F7_RAT	52377	1	SubName: Full=Protein Marco {ECO:0000313|Ensembl:ENSRNOP00000066125} OS=Rattus norvegicus (Rat)
	F1LN61_RAT	36540	3	SubName: Full=Uncharacterized protein {ECO:0000313|Ensembl:ENSRNOP00000062949} OS=Rattus norvegicus (Rat)
	DHTK1_RAT	102576	8	RecName: Full=Probable 2-oxoglutarate dehydrogenase E1 component DHKTD1
	B6DYP7_RAT	25591	7	RecName: Full=Glutathione S-transferase {ECO:0000256|RuleBase:RU004454}; EC=2.5.1.18 {ECO:0000256|RuleBase:RU004454} OS=Rattus norvegicus (Rat)
	ARF5_RAT	20517	4	RecName: Full=ADP-ribosylation factor 5 OS=Rattus norvegicus (Rat)
	Q9WVT5_RAT	57547	6	SubName: Full=Sterol 12alpha-hydroxylase P450 {ECO:0000313|EMBL:BAA82169.1} OS=Rattus norvegicus (Rat)
	AATC_RAT	46400	6	RecName: Full=Aspartate aminotransferase
	SODC_RAT	15902	2	RecName: Full=Superoxide dismutase [Cu-Zn]; EC=1.15.1.1 OS=Rattus norvegicus (Rat)
	AMRP_RAT	42006	4	RecName: Full=Alpha-2-macroglobulin receptor-associated protein; Short=Alpha-2-MRAP; AltName: Full=Gp330-binding 45 kDa protein; AltName: Full=Low density lipoprotein receptor-related protein-associated protein 1; Short=RAP; Flags: Precursor OS=Ratt
	Q9Z296_RAT	46275	2	SubName: Full=Putative glycogen storage disease type 1b protein {ECO:0000313|EMBL:AAC79839.1} OS=Rattus norvegicus (Rat)
	CP4F3_RAT	59867	4	RecName: Full=Leukotriene-B(4) omega-hydroxylase 2; EC=1.14.13.30; AltName: Full=CYPIVF3; AltName: Full=Cytochrome P450 4F3; AltName: Full=Cytochrome P450-LTB-omega; AltName: Full=Leukotriene-B(4) 20-monooxygenase 2 OS=Rattus norvegicus (Rat)
	B5DEL8_RAT	12692	5	SubName: Full=NADH dehydrogenase (Ubiquinone) Fe-S protein 5 {ECO:0000313|EMBL:AAI68721.1}; SubName: Full=Protein LOC100361505 {ECO:0000313|Ensembl:ENSRNOP00000037699}; SubName: Full=RCG31129
	CISD1_RAT	12089	4	RecName: Full=CDGSH iron-sulfur domain-containing protein 1; AltName: Full=MitoNEET OS=Rattus norvegicus (Rat)
	ERP29_RAT	28557	5	RecName: Full=Endoplasmic reticulum resident protein 29; Short=ERp29; AltName: Full=Endoplasmic reticulum resident protein 31; Short=ERp31; Flags: Precursor OS=Rattus norvegicus (Rat)
	MCAT_RAT	33132	6	RecName: Full=Mitochondrial carnitine/acylcarnitine carrier protein; AltName: Full=Carnitine/acylcarnitine translocase; Short=CAC; AltName: Full=Solute carrier family 25 member 20 OS=Rattus norvegicus (Rat)
	D3ZHI1_RAT	89957	4	SubName: Full=Protein LOC100912115 {ECO:0000313|Ensembl:ENSRNOP00000006995} OS=Rattus norvegicus (Rat)
	DHPR_RAT	25536	4	RecName: Full=Dihydropteridine reductase; EC=1.5.1.34; AltName: Full=HDHPR; AltName: Full=Quinoid dihydropteridine reductase OS=Rattus norvegicus (Rat)
	NUCL_RAT	77101	3	RecName: Full=Nucleolin; AltName: Full=Protein C23 OS=Rattus norvegicus (Rat)
	D4ACV3_RAT	13980	3	RecName: Full=Histone H2A {ECO:0000256|RuleBase:RU000527} OS=Rattus norvegicus (Rat)
	PCYOX_RAT	56252	3	RecName: Full=Prenylcysteine oxidase; EC=1.8.3.5; AltName: Full=Chloride ion pump-associated 55 kDa protein; Flags: Precursor OS=Rattus norvegicus (Rat)
	PARK7_RAT	19961	2	RecName: Full=Protein deglycase DJ-1 {ECO:0000250|UniProtKB:Q99497}; EC=3.1.2.- {ECO:0000250|UniProtKB:Q99497}; EC=3.5.1.- {ECO:0000250|UniProtKB:Q99497}; AltName: Full=Contraception-associated protein 1 {ECO:0000303|PubMed:9792810}; Short=Protein C
	Q06884_RAT	57638	7	SubName: Full=Cytochrome P-450 {ECO:0000313|EMBL:BAA03008.1}; SubName: Full=Cytochrome P450
	CH10_RAT	10895	4	RecName: Full=10 kDa heat shock protein
	Q5PQU1_RAT	47734	3	SubName: Full=Kininogen 1 {ECO:0000313|EMBL:AAH87028.1} OS=Rattus norvegicus (Rat)
	AOXA_RAT	146826	5	RecName: Full=Aldehyde oxidase 1; EC=1.2.3.1; AltName: Full=Azaheterocycle hydroxylase 1; EC=1.17.3.- OS=Rattus norvegicus (Rat)
	GCKR_RAT	68874	4	RecName: Full=Glucokinase regulatory protein; Short=Glucokinase regulator OS=Rattus norvegicus (Rat)
	AAAD_RAT	45664	5	RecName: Full=Arylacetamide deacetylase; EC=3.1.1.3 OS=Rattus norvegicus (Rat)
	SEP15_RAT	17812	5	RecName: Full=15 kDa selenoprotein; Flags: Precursor OS=Rattus norvegicus (Rat)
	D3ZAS9_RAT	38582	2	SubName: Full=Protein Ddrgk1 {ECO:0000313|Ensembl:ENSRNOP00000036810}; SubName: Full=Similar to chromosome 20 open reading frame 116 (Predicted) {ECO:0000313|EMBL:EDL80206.1} OS=Rattus norvegicus (Rat)
	B0BNK1_RAT	23411	3	SubName: Full=Protein Rab5c {ECO:0000313|Ensembl:ENSRNOP00000031520}; SubName: Full=RCG32615
	D3ZZK1_RAT	13345	3	SubName: Full=Protein LOC100359563 {ECO:0000313|Ensembl:ENSRNOP00000051318} OS=Rattus norvegicus (Rat)
	RL23_RAT	14856	3	RecName: Full=60S ribosomal protein L23 OS=Rattus norvegicus (Rat)
	B0BMY8_RAT	15318	3	RecName: Full=Histone H3 {ECO:0000256|RuleBase:RU004471} OS=Rattus norvegicus (Rat)
	D3ZNZ5_RAT	52727	3	SubName: Full=Protein Ero1lb {ECO:0000313|Ensembl:ENSRNOP00000003526} OS=Rattus norvegicus (Rat)
	B5DEL9_RAT	22113	5	SubName: Full=RCG62292
	Q45QL6_RAT	34981	4	SubName: Full=Guanine nucleotide binding protein beta 2 {ECO:0000313|EMBL:AAZ23825.1}; Flags: Fragment OS=Rattus norvegicus (Rat)
	NIT2_RAT	30682	4	RecName: Full=Omega-amidase NIT2; EC=3.5.1.3 {ECO:0000269|PubMed:19595734}; AltName: Full=Nitrilase homolog 2 OS=Rattus norvegicus (Rat)
	G3V9A6_RAT	25140	3	SubName: Full=Lysoplasmalogenase {ECO:0000313|Ensembl:ENSRNOP00000040879}; SubName: Full=RCG22704 {ECO:0000313|EMBL:EDL75844.1} OS=Rattus norvegicus (Rat)
	NDRG2_RAT	40753	3	RecName: Full=Protein NDRG2; AltName: Full=Antidepressant-related protein ADRG123; AltName: Full=N-myc downstream-regulated gene 2 protein; AltName: Full=NDRG1-related protein OS=Rattus norvegicus (Rat)
	A0A096MIU7_RAT	16206	2	RecName: Full=40S ribosomal protein S24 {ECO:0000256|RuleBase:RU004383}; Flags: Fragment OS=Rattus norvegicus (Rat)
	Q4V8I6_RAT	19012	3	SubName: Full=Ribosomal protein L11 {ECO:0000313|EMBL:AAH97372.1} OS=Rattus norvegicus (Rat)
	B1H270_RAT	46959	7	RecName: Full=Succinyl-CoA ligase subunit beta {ECO:0000256|RuleBase:RU361258}; EC=6.2.1.- {ECO:0000256|RuleBase:RU361258} OS=Rattus norvegicus (Rat)
	SOAT2_RAT	60458	5	RecName: Full=Sterol O-acyltransferase 2; EC=2.3.1.26; AltName: Full=Acyl-coenzyme A:cholesterol acyltransferase 2; Short=ACAT-2; AltName: Full=Cholesterol acyltransferase 2 OS=Rattus norvegicus (Rat)
	HNRPK_RAT	50944	3	RecName: Full=Heterogeneous nuclear ribonucleoprotein K; Short=hnRNP K; AltName: Full=dC stretch-binding protein; Short=CSBP OS=Rattus norvegicus (Rat)
	HCDH_RAT	34426	6	RecName: Full=Hydroxyacyl-coenzyme A dehydrogenase
	FETUB_RAT	41536	4	RecName: Full=Fetuin-B; AltName: Full=Fetuin-like protein IRL685; Flags: Precursor OS=Rattus norvegicus (Rat)
	D3ZTP0_RAT	102911	6	RecName: Full=10-formyltetrahydrofolate dehydrogenase {ECO:0000256|PIRNR:PIRNR036489}; EC=1.5.1.6 {ECO:0000256|PIRNR:PIRNR036489} OS=Rattus norvegicus (Rat)
	Q4KLN2_RAT	49711	2	SubName: Full=Mtx1 protein {ECO:0000313|EMBL:AAH99090.1}; Flags: Fragment OS=Rattus norvegicus (Rat)
	ESTD_RAT	31343	3	RecName: Full=S-formylglutathione hydrolase; Short=FGH; EC=3.1.2.12; AltName: Full=Esterase D OS=Rattus norvegicus (Rat)
	GPDA_RAT	37428	10	RecName: Full=Glycerol-3-phosphate dehydrogenase [NAD(+)]
	B0BNM7_RAT	30725	1	SubName: Full=Sco1 protein {ECO:0000313|EMBL:AAI58883.1}; Flags: Fragment OS=Rattus norvegicus (Rat)
	ACSF2_RAT	67843	4	RecName: Full=Acyl-CoA synthetase family member 2
	F1LU48_RAT	32396	1	SubName: Full=Protein Ergic1 {ECO:0000313|Ensembl:ENSRNOP00000005273}; Flags: Fragment OS=Rattus norvegicus (Rat)
	MCCB_RAT	61478	5	RecName: Full=Methylcrotonoyl-CoA carboxylase beta chain
	S22AI_RAT	43001	4	RecName: Full=Solute carrier family 22 member 18; AltName: Full=Organic cation transporter-like protein 2; Short=ORCTL-2 OS=Rattus norvegicus (Rat)
	TCPA_RAT	60322	5	RecName: Full=T-complex protein 1 subunit alpha; Short=TCP-1-alpha; AltName: Full=CCT-alpha OS=Rattus norvegicus (Rat)
	F213A_RAT	25746	3	RecName: Full=Redox-regulatory protein FAM213A; AltName: Full=Peroxiredoxin-like 2 activated in M-CSF stimulated monocytes; Short=Protein PAMM; AltName: Full=Sperm head protein 1 OS=Rattus norvegicus (Rat)
	CAND1_RAT	136275	4	RecName: Full=Cullin-associated NEDD8-dissociated protein 1; AltName: Full=Cullin-associated and neddylation-dissociated protein 1; AltName: Full=TBP-interacting protein of 120 kDa A; Short=TBP-interacting protein 120A; AltName: Full=p120 CAND1 OS=R
	ECHD3_RAT	32365	4	RecName: Full=Enoyl-CoA hydratase domain-containing protein 3
	CATC_RAT	52202	3	RecName: Full=Dipeptidyl peptidase 1; EC=3.4.14.1; AltName: Full=Cathepsin C; AltName: Full=Cathepsin J; AltName: Full=Dipeptidyl peptidase I; Short=DPP-I; Short=DPPI; AltName: Full=Dipeptidyl transferase; Contains: RecName: Full=Dipeptidyl peptidas
	RL24_RAT	17768	4	RecName: Full=60S ribosomal protein L24; AltName: Full=L30 OS=Rattus norvegicus (Rat)
	IVD_RAT	46406	6	RecName: Full=Isovaleryl-CoA dehydrogenase
	FUMH_RAT	54429	3	RecName: Full=Fumarate hydratase
	KHK_RAT	32729	3	RecName: Full=Ketohexokinase {ECO:0000312|RGD:2966}; EC=2.7.1.3; AltName: Full=Hepatic fructokinase OS=Rattus norvegicus (Rat)
	D3ZFQ8_RAT	23006	1	SubName: Full=Cytochrome c-1 (Predicted)
	THTM_RAT	32919	3	RecName: Full=3-mercaptopyruvate sulfurtransferase; Short=MST; EC=2.8.1.2 OS=Rattus norvegicus (Rat)
	GNAI2_RAT	40473	3	RecName: Full=Guanine nucleotide-binding protein G(i) subunit alpha-2; AltName: Full=Adenylate cyclase-inhibiting G alpha protein OS=Rattus norvegicus (Rat)
	SERP1_RAT	7369	1	RecName: Full=Stress-associated endoplasmic reticulum protein 1; AltName: Full=Ribosome-attached membrane protein 4 OS=Rattus norvegicus (Rat)
	CDC42_RAT	21245	5	RecName: Full=Cell division control protein 42 homolog; Flags: Precursor OS=Rattus norvegicus (Rat)
	EMC8_RAT	23390	1	RecName: Full=ER membrane protein complex subunit 8; AltName: Full=Neighbor of COX4 OS=Rattus norvegicus (Rat)
	F1M6F4_RAT	13636	3	SubName: Full=Protein LOC100912210 {ECO:0000313|Ensembl:ENSRNOP00000047391}; Flags: Fragment OS=Rattus norvegicus (Rat)
	TXTP_RAT	33814	6	RecName: Full=Tricarboxylate transport protein
	D3Z8D7_RAT	12998	3	SubName: Full=Protein LOC100361854 {ECO:0000313|Ensembl:ENSRNOP00000048116} OS=Rattus norvegicus (Rat)
	D3ZD31_RAT	165752	4	SubName: Full=Mannose receptor
	ASGR1_RAT	32828	5	RecName: Full=Asialoglycoprotein receptor 1; Short=ASGP-R 1; Short=ASGPR 1; AltName: Full=Hepatic lectin 1; Short=HL-1; Short=rHL-1 OS=Rattus norvegicus (Rat)
	M0R9I8_RAT	14491	4	RecName: Full=40S ribosomal protein S12 {ECO:0000256|RuleBase:RU000670} OS=Rattus norvegicus (Rat)
	ATPD_RAT	17584	2	RecName: Full=ATP synthase subunit delta
	CP255_RAT	55954	3	RecName: Full=Cytochrome P450 2C55; EC=1.14.14.1; AltName: Full=CYPIIC24; AltName: Full=CYPIIC55; AltName: Full=Cytochrome P450 2C24; AltName: Full=Cytochrome P450-PROS2 OS=Rattus norvegicus (Rat)
	1433B_RAT	28037	2	RecName: Full=14-3-3 protein beta/alpha; AltName: Full=Prepronerve growth factor RNH-1; AltName: Full=Protein kinase C inhibitor protein 1; Short=KCIP-1; Contains: RecName: Full=14-3-3 protein beta/alpha
	TMM33_RAT	27965	3	RecName: Full=Transmembrane protein 33; AltName: Full=Protein DB83 OS=Rattus norvegicus (Rat)
	D3ZFC6_RAT	103416	2	SubName: Full=Protein Itih4 {ECO:0000313|Ensembl:ENSRNOP00000048673} OS=Rattus norvegicus (Rat)
	B2RZD6_RAT	9321	3	SubName: Full=Ndufa4 protein {ECO:0000313|EMBL:AAI67115.1}; SubName: Full=Protein Ndufa4 {ECO:0000313|Ensembl:ENSRNOP00000007567}; SubName: Full=RCG28086
	ECI1_RAT	32234	4	RecName: Full=Enoyl-CoA delta isomerase 1
	HNRPF_RAT	45701	2	RecName: Full=Heterogeneous nuclear ribonucleoprotein F; Short=hnRNP F; Contains: RecName: Full=Heterogeneous nuclear ribonucleoprotein F
	Q5M7T5_RAT	52201	5	SubName: Full=Protein Serpinc1 {ECO:0000313|Ensembl:ENSRNOP00000003748}; SubName: Full=Serine (Or cysteine) peptidase inhibitor
	ABCBB_RAT	146165	4	RecName: Full=Bile salt export pump; AltName: Full=ATP-binding cassette sub-family B member 11; AltName: Full=Sister of P-glycoprotein OS=Rattus norvegicus (Rat)
	OS9_RAT	75318	5	RecName: Full=Protein OS-9; Flags: Precursor OS=Rattus norvegicus (Rat)
	SAM50_RAT	51927	3	RecName: Full=Sorting and assembly machinery component 50 homolog OS=Rattus norvegicus (Rat)
	HPT_RAT	38539	4	RecName: Full=Haptoglobin; AltName: Full=Liver regeneration-related protein LRRG173; AltName: Full=Zonulin; Contains: RecName: Full=Haptoglobin alpha chain; Contains: RecName: Full=Haptoglobin beta chain; Flags: Precursor OS=Rattus norvegicus (Rat)
	M0RCU5_RAT	24463	4	SubName: Full=Protein Urad {ECO:0000313|Ensembl:ENSRNOP00000067429}; SubName: Full=RCG42793 {ECO:0000313|EMBL:EDL89563.1} OS=Rattus norvegicus (Rat)
	ROA3_RAT	39628	4	RecName: Full=Heterogeneous nuclear ribonucleoprotein A3; Short=hnRNP A3 OS=Rattus norvegicus (Rat)
	F1LW74_RAT	180537	7	SubName: Full=Protein Iqgap2 {ECO:0000313|Ensembl:ENSRNOP00000029373} OS=Rattus norvegicus (Rat)
	CALM_RAT	16827	3	RecName: Full=Calmodulin; Short=CaM OS=Rattus norvegicus (Rat)
	Q6P3V8_RAT	46125	3	SubName: Full=Eukaryotic translation initiation factor 4A1 {ECO:0000313|EMBL:AAH63812.1}; SubName: Full=Eukaryotic translation initiation factor 4A1
	CISY_RAT	51833	3	RecName: Full=Citrate synthase
	Q6AYU2_RAT	38197	3	SubName: Full=Pcbp2 protein {ECO:0000313|EMBL:AAH78909.1}; SubName: Full=RCG50739
	FA65B_RAT	144619	4	RecName: Full=Protein FAM65B OS=Rattus norvegicus (Rat)
	Q5RK10_RAT	23431	3	SubName: Full=60S ribosomal protein L13a {ECO:0000313|Ensembl:ENSRNOP00000027976}; SubName: Full=Neuroprotective protein 11 {ECO:0000313|EMBL:ABY47887.1}; SubName: Full=RCG53885
	ATIF1_RAT	12240	1	RecName: Full=ATPase inhibitor
	ARK73_RAT	36723	3	RecName: Full=Aflatoxin B1 aldehyde reductase member 3; Short=AFB1-AR; EC=1.-.-.-; AltName: Full=Aflatoxin B1 aldehyde reductase member 1; Short=rAFAR1 OS=Rattus norvegicus (Rat)
	M3ZCQ0_RAT	33099	3	RecName: Full=Sulfotransferase {ECO:0000256|RuleBase:RU361155}; EC=2.8.2.- {ECO:0000256|RuleBase:RU361155} OS=Rattus norvegicus (Rat)
	MRP2_RAT	173274	3	RecName: Full=Canalicular multispecific organic anion transporter 1; AltName: Full=ATP-binding cassette sub-family C member 2; AltName: Full=Canalicular multidrug resistance protein; AltName: Full=Multidrug resistance-associated protein 2 OS=Rattus
	F1LPR6_RAT	41281	2	SubName: Full=Uncharacterized protein {ECO:0000313|Ensembl:ENSRNOP00000006888}; Flags: Fragment OS=Rattus norvegicus (Rat)
	A0A096MJM1_RAT	20766	3	SubName: Full=Protein Rhog {ECO:0000313|Ensembl:ENSRNOP00000068181} OS=Rattus norvegicus (Rat)
	SSRA_RAT	35607	4	RecName: Full=Translocon-associated protein subunit alpha; Short=TRAP-alpha; AltName: Full=Liver regeneration-related protein LRRG137; AltName: Full=Signal sequence receptor subunit alpha; Short=SSR-alpha; Flags: Precursor OS=Rattus norvegicus (Rat)
	ACBP_RAT	10021	2	RecName: Full=Acyl-CoA-binding protein; Short=ACBP; AltName: Full=Diazepam-binding inhibitor; Short=DBI; AltName: Full=Endozepine; Short=EP; Contains: RecName: Full=Triakontatetraneuropeptide; Short=TTN; Contains: RecName: Full=Octadecaneuropeptide;
	UP1_RAT	10952	3	RecName: Full=Urinary protein 1; Short=UP-1; Short=rUP-1; AltName: Full=Liver regeneration-related protein LRRG05; Flags: Precursor OS=Rattus norvegicus (Rat)
	DAD1_RAT	12489	3	RecName: Full=Dolichyl-diphosphooligosaccharide--protein glycosyltransferase subunit DAD1; Short=Oligosaccharyl transferase subunit DAD1; EC=2.4.99.18; AltName: Full=Defender against cell death 1; Short=DAD-1 OS=Rattus norvegicus (Rat)
	F1LSW7_RAT	23310	3	SubName: Full=60S ribosomal protein L14 {ECO:0000313|Ensembl:ENSRNOP00000061747} OS=Rattus norvegicus (Rat)
	NDUS4_RAT	19728	4	RecName: Full=NADH dehydrogenase [ubiquinone] iron-sulfur protein 4
	D3ZZR9_RAT	15378	2	RecName: Full=Peptidyl-prolyl cis-trans isomerase {ECO:0000256|RuleBase:RU004231} OS=Rattus norvegicus (Rat)
	D4ABI7_RAT	43076	5	SubName: Full=Protein LOC100365676 {ECO:0000313|Ensembl:ENSRNOP00000045049}; SubName: Full=Similar to Butyrate-induced transcript 1 (Predicted) {ECO:0000313|EMBL:EDL95810.1} OS=Rattus norvegicus (Rat)
	A0A096XKT9_RAT	68538	3	RecName: Full=NADH-ubiquinone oxidoreductase chain 5 {ECO:0000256|RuleBase:RU003404
	A9UMV9_RAT	12493	3	SubName: Full=Ndufa7 protein {ECO:0000313|EMBL:AAI57818.1}; SubName: Full=Protein Ndufa7 {ECO:0000313|Ensembl:ENSRNOP00000009425}; SubName: Full=RCG37550
	PROF1_RAT	14948	4	RecName: Full=Profilin-1; AltName: Full=Profilin I OS=Rattus norvegicus (Rat)
	TMED2_RAT	22718	3	RecName: Full=Transmembrane emp24 domain-containing protein 2; AltName: Full=COPI-coated vesicle membrane protein p24; AltName: Full=Membrane protein p24A; AltName: Full=RNP21.4; AltName: Full=p24 family protein beta-1; Short=p24beta1; Flags: Precur
	Q66HM2_RAT	104108	5	SubName: Full=AP-2 complex subunit alpha-2 {ECO:0000313|Ensembl:ENSRNOP00000060992}; SubName: Full=Adaptor-related protein complex 2
	Q5PQZ9_RAT	14349	4	RecName: Full=NADH dehydrogenase [ubiquinone] 1 subunit C2 {ECO:0000256|PIRNR:PIRNR017834} OS=Rattus norvegicus (Rat)
	D3ZVS2_RAT	50700	2	SubName: Full=L-2-hydroxyglutarate dehydrogenase (Predicted) {ECO:0000313|EMBL:EDM03526.1}; SubName: Full=Protein L2hgdh {ECO:0000313|Ensembl:ENSRNOP00000006473} OS=Rattus norvegicus (Rat)
	B1WBY7_RAT	39241	3	SubName: Full=ER lipid raft associated 1 {ECO:0000313|EMBL:AAI61938.1}; SubName: Full=Protein Erlin1 {ECO:0000313|Ensembl:ENSRNOP00000017268}; SubName: Full=SPFH domain family
	A1L1L6_RAT	72111	2	RecName: Full=Mitochondrial Rho GTPase {ECO:0000256|PIRNR:PIRNR037488}; EC=3.6.5.- {ECO:0000256|PIRNR:PIRNR037488} OS=Rattus norvegicus (Rat)
	Q3MHS9_RAT	57981	4	SubName: Full=Chaperonin containing Tcp1
	D3ZRM9_RAT	24187	3	RecName: Full=60S ribosomal protein L13 {ECO:0000256|RuleBase:RU000572} OS=Rattus norvegicus (Rat)
	RS9_RAT	22578	8	RecName: Full=40S ribosomal protein S9 OS=Rattus norvegicus (Rat)
	PCCB_RAT	58589	3	RecName: Full=Propionyl-CoA carboxylase beta chain
	HMCS1_RAT	57397	3	RecName: Full=Hydroxymethylglutaryl-CoA synthase
	NDUAB_RAT	14844	2	RecName: Full=NADH dehydrogenase [ubiquinone] 1 alpha subcomplex subunit 11; AltName: Full=Complex I-B14.7; Short=CI-B14.7; AltName: Full=NADH-ubiquinone oxidoreductase subunit B14.7 OS=Rattus norvegicus (Rat)
	KAD4_RAT	25187	4	RecName: Full=Adenylate kinase 4
	D3ZAK6_RAT	16902	2	SubName: Full=Uncharacterized protein {ECO:0000313|Ensembl:ENSRNOP00000062631} OS=Rattus norvegicus (Rat)
	Q8CJG5_RAT	48582	3	SubName: Full=Gene {ECO:0000313|EMBL:BAC11910.1} OS=Rattus norvegicus (Rat)
	D3ZHZ6_RAT	58291	6	SubName: Full=Cytochrome P450 4A10 {ECO:0000313|Ensembl:ENSRNOP00000041025} OS=Rattus norvegicus (Rat)
	M0R5M7_RAT	17673	1	RecName: Full=Transcription factor BTF3 {ECO:0000256|RuleBase:RU361272} OS=Rattus norvegicus (Rat)
	M0R7A4_RAT	21679	3	SubName: Full=Uncharacterized protein {ECO:0000313|Ensembl:ENSRNOP00000065327}; Flags: Fragment OS=Rattus norvegicus (Rat)
	B0BMW0_RAT	23882	3	SubName: Full=RAB14
	DHB7_RAT	37348	3	RecName: Full=3-keto-steroid reductase; EC=1.1.1.270; AltName: Full=17-beta-hydroxysteroid dehydrogenase 7; Short=17-beta-HSD 7; AltName: Full=Estradiol 17-beta-dehydrogenase 7; EC=1.1.1.62; AltName: Full=PRL receptor-associated protein; Short=PRAP
	SAR1B_RAT	22396	4	RecName: Full=GTP-binding protein SAR1b OS=Rattus norvegicus (Rat)
	FIBG_RAT	50600	3	RecName: Full=Fibrinogen gamma chain; Flags: Precursor OS=Rattus norvegicus (Rat)
	SGPL1_RAT	63717	3	RecName: Full=Sphingosine-1-phosphate lyase 1; Short=S1PL; Short=SP-lyase 1; Short=SPL; Short=SPL 1; EC=4.1.2.27; AltName: Full=Sphingosine-1-phosphate aldolase OS=Rattus norvegicus (Rat)
	D4A565_RAT	21650	5	SubName: Full=NADH dehydrogenase (Ubiquinone) 1 beta subcomplex
	F1LQI1_RAT	34136	4	SubName: Full=Hydroxyacyl glutathione hydrolase {ECO:0000313|EMBL:EDM03882.1}; SubName: Full=Hydroxyacylglutathione hydrolase
	SNAA_RAT	33171	4	RecName: Full=Alpha-soluble NSF attachment protein; Short=SNAP-alpha; AltName: Full=N-ethylmaleimide-sensitive factor attachment protein alpha OS=Rattus norvegicus (Rat)
	PRDX5_RAT	22165	4	RecName: Full=Peroxiredoxin-5
	R9PXR4_RAT	61899	4	SubName: Full=Mitochondrial import receptor subunit TOM70 {ECO:0000313|Ensembl:ENSRNOP00000002238} OS=Rattus norvegicus (Rat)
	Q9JKB7_RAT	50869	4	SubName: Full=Guanine deaminase {ECO:0000313|EMBL:AAF63337.1
	D4A786_RAT	6377	3	SubName: Full=Protein LOC100360002 {ECO:0000313|Ensembl:ENSRNOP00000061817} OS=Rattus norvegicus (Rat)
	RL32_RAT	15850	2	RecName: Full=60S ribosomal protein L32 OS=Rattus norvegicus (Rat)
	M0RDW3_RAT	25648	4	SubName: Full=Protein LOC102549803 {ECO:0000313|Ensembl:ENSRNOP00000067826} OS=Rattus norvegicus (Rat)
	D3ZGK7_RAT	60272	3	RecName: Full=Carboxylic ester hydrolase; EC=3.1.1.- OS=Rattus norvegicus (Rat)
	B1H271_RAT	35164	2	SubName: Full=Slc25a42 protein {ECO:0000313|EMBL:AAI60887.1} OS=Rattus norvegicus (Rat)
	Q6PDV8_RAT	14750	2	SubName: Full=RCG31311 {ECO:0000313|EMBL:EDL81233.1}; SubName: Full=Ribosomal protein L22 {ECO:0000313|EMBL:AAH58466.1} OS=Rattus norvegicus (Rat)
	ITIH3_RAT	99036	2	RecName: Full=Inter-alpha-trypsin inhibitor heavy chain H3; Short=ITI heavy chain H3; Short=ITI-HC3; Short=Inter-alpha-inhibitor heavy chain 3; Flags: Precursor OS=Rattus norvegicus (Rat)
	B2RZC1_RAT	23205	3	SubName: Full=Retinol binding protein 4
	IF2A_RAT	36085	2	RecName: Full=Eukaryotic translation initiation factor 2 subunit 1; AltName: Full=Eukaryotic translation initiation factor 2 subunit alpha; Short=eIF-2-alpha; Short=eIF-2A; Short=eIF-2alpha OS=Rattus norvegicus (Rat)
	Q7M079_RAT	1977	1	SubName: Full=Calcium-binding protein 4 {ECO:0000313|PIR:B34473}; Flags: Fragment OS=Rattus norvegicus (Rat)
	SAP_RAT	61084	2	RecName: Full=Sulfated glycoprotein 1; Short=SGP-1; AltName: Full=Prosaposin; Flags: Precursor OS=Rattus norvegicus (Rat)
	THIO_RAT	11666	3	RecName: Full=Thioredoxin; Short=Trx OS=Rattus norvegicus (Rat)
	B2RYT5_RAT	12643	3	SubName: Full=Cox7a2l protein {ECO:0000313|EMBL:AAI66896.1}; SubName: Full=Cytochrome c oxidase subunit VIIa polypeptide 2 like (Predicted)
	Q68HW7_RAT	73124	3	SubName: Full=ABC transporter ABCG3 {ECO:0000313|EMBL:AAT99308.1} OS=Rattus norvegicus (Rat)
	F1LPJ9_RAT	43324	2	SubName: Full=Uncharacterized protein {ECO:0000313|Ensembl:ENSRNOP00000058054} OS=Rattus norvegicus (Rat)
	K1C10_RAT	56470	4	RecName: Full=Keratin
	ATP5I_RAT	8249	3	RecName: Full=ATP synthase subunit e
	ERAP1_RAT	106351	3	RecName: Full=Endoplasmic reticulum aminopeptidase 1; EC=3.4.11.-; AltName: Full=ARTS-1; AltName: Full=Adipocyte-derived leucine aminopeptidase; Short=A-LAP; AltName: Full=Aminopeptidase PILS; AltName: Full=Puromycin-insensitive leucyl-specific amin
	Q5U2S7_RAT	60650	3	SubName: Full=Proteasome (Prosome
	FKBP8_RAT	43528	2	RecName: Full=Peptidyl-prolyl cis-trans isomerase FKBP8; Short=PPIase FKBP8; EC=5.2.1.8; AltName: Full=FK506-binding protein 8; Short=FKBP-8; AltName: Full=Rotamase OS=Rattus norvegicus (Rat)
	RL10_RAT	24588	4	RecName: Full=60S ribosomal protein L10 OS=Rattus norvegicus (Rat)
	PEBP1_RAT	20788	4	RecName: Full=Phosphatidylethanolamine-binding protein 1; Short=PEBP-1; AltName: Full=23 kDa morphine-binding protein; AltName: Full=HCNPpp; AltName: Full=P23K; Contains: RecName: Full=Hippocampal cholinergic neurostimulating peptide; Short=HCNP OS=
	C4BPA_RAT	62225	2	RecName: Full=C4b-binding protein alpha chain; Short=C4bp; Flags: Precursor OS=Rattus norvegicus (Rat)
	B1H282_RAT	71069	3	SubName: Full=Glycosyltransferase 25 domain containing 1 {ECO:0000313|EMBL:AAI60899.1}; SubName: Full=Glycosyltransferase 25 domain containing 1 (Predicted) {ECO:0000313|EMBL:EDL90767.1}; SubName: Full=Protein Colgalt1 {ECO:0000313|Ensembl:ENSRNOP00
	M0R7B4_RAT	23198	3	SubName: Full=Protein LOC684828 {ECO:0000313|Ensembl:ENSRNOP00000065338} OS=Rattus norvegicus (Rat)
	1433G_RAT	28285	3	RecName: Full=14-3-3 protein gamma; Contains: RecName: Full=14-3-3 protein gamma
	ARF4_RAT	20384	3	RecName: Full=ADP-ribosylation factor 4 OS=Rattus norvegicus (Rat)
	Q7TMA9_RAT	116387	4	SubName: Full=Aa1249 {ECO:0000313|EMBL:AAP85372.1}; SubName: Full=Ab1-341 {ECO:0000313|EMBL:AAP92619.1}; SubName: Full=Ab2-196 {ECO:0000313|EMBL:AAP92597.1}; SubName: Full=Ac1-114 {ECO:0000313|EMBL:AAP86250.1}; SubName: Full=Ac1262 {ECO:0000313|EMBL
	3HIDH_RAT	35280	2	RecName: Full=3-hydroxyisobutyrate dehydrogenase
	B5DFH4_RAT	69367	5	SubName: Full=Papss2 protein {ECO:0000313|EMBL:AAI69061.1}; SubName: Full=Protein Papss2 {ECO:0000313|Ensembl:ENSRNOP00000014979} OS=Rattus norvegicus (Rat)
	NDUV3_RAT	11934	2	RecName: Full=NADH dehydrogenase [ubiquinone] flavoprotein 3
	COMT_RAT	29578	6	RecName: Full=Catechol O-methyltransferase; EC=2.1.1.6 OS=Rattus norvegicus (Rat)
	Q5XIM0_RAT	47363	3	SubName: Full=BCS1-like (Yeast) {ECO:0000313|EMBL:AAH83660.1}; SubName: Full=BCS1-like (Yeast)
	ST1E1_RAT	35486	4	RecName: Full=Estrogen sulfotransferase
	SYJ2B_RAT	15815	4	RecName: Full=Synaptojanin-2-binding protein; AltName: Full=Mitochondrial outer membrane protein 25; AltName: Full=NPW16 OS=Rattus norvegicus (Rat)
	TCPG_RAT	60608	3	RecName: Full=T-complex protein 1 subunit gamma; Short=TCP-1-gamma; AltName: Full=CCT-gamma OS=Rattus norvegicus (Rat)
	B2RYS0_RAT	9347	2	SubName: Full=Cox7a2 protein {ECO:0000313|EMBL:AAI66880.1}; SubName: Full=RCG25255
	GSTK1_RAT	25476	2	RecName: Full=Glutathione S-transferase kappa 1; EC=2.5.1.18; AltName: Full=GST 13-13; AltName: Full=GST class-kappa; AltName: Full=GSTK1-1; Short=rGSTK1; AltName: Full=Glutathione S-transferase subunit 13 OS=Rattus norvegicus (Rat)
	Q68FZ8_RAT	58641	3	SubName: Full=Propionyl coenzyme A carboxylase
	ACTN4_RAT	104849	4	RecName: Full=Alpha-actinin-4 {ECO:0000305}; AltName: Full=Non-muscle alpha-actinin 4 {ECO:0000305} OS=Rattus norvegicus (Rat)
	SODM_RAT	24659	4	RecName: Full=Superoxide dismutase [Mn]
	M0RBX6_RAT	15361	3	RecName: Full=Histone H3 {ECO:0000256|RuleBase:RU004471} OS=Rattus norvegicus (Rat)
	G3V9G4_RAT	119637	4	SubName: Full=ATP citrate lyase
	F1M9K9_RAT	120343	3	RecName: Full=6-phosphogluconate dehydrogenase
	F1LT36_RAT	18881	3	SubName: Full=Protein RGD1564698 {ECO:0000313|Ensembl:ENSRNOP00000046992} OS=Rattus norvegicus (Rat)
	MPC2_RAT	14249	4	RecName: Full=Mitochondrial pyruvate carrier 2; AltName: Full=Brain protein 44; AltName: Full=Protein 0-44 OS=Rattus norvegicus (Rat)
	UBXN4_RAT	56359	1	RecName: Full=UBX domain-containing protein 4; AltName: Full=Erasin; AltName: Full=UBX domain-containing protein 2 OS=Rattus norvegicus (Rat)
	RL37P_RAT	10268	3	RecName: Full=Putative 60S ribosomal protein L37a; AltName: Full=60S ribosomal protein L37a pseudogene 1 OS=Rattus norvegicus (Rat)
	RMD3_RAT	52280	2	RecName: Full=Regulator of microtubule dynamics protein 3; Short=RMD-3; AltName: Full=Protein FAM82A2; AltName: Full=Protein FAM82C OS=Rattus norvegicus (Rat)
	AFAM_RAT	69290	3	RecName: Full=Afamin; AltName: Full=Alpha-albumin; Short=Alpha-Alb; Flags: Precursor OS=Rattus norvegicus (Rat)
	HMGCL_RAT	34170	2	RecName: Full=Hydroxymethylglutaryl-CoA lyase
	AP2B1_RAT	104486	3	RecName: Full=AP-2 complex subunit beta; AltName: Full=AP105B; AltName: Full=Adaptor protein complex AP-2 subunit beta; AltName: Full=Adaptor-related protein complex 2 subunit beta; AltName: Full=Beta-2-adaptin; AltName: Full=Beta-adaptin; AltName:
	AADAT_RAT	47754	4	RecName: Full=Kynurenine/alpha-aminoadipate aminotransferase
	TIM8A_RAT	11035	2	RecName: Full=Mitochondrial import inner membrane translocase subunit Tim8 A; AltName: Full=Deafness dystonia protein 1 homolog OS=Rattus norvegicus (Rat)
	NUCB1_RAT	53474	5	RecName: Full=Nucleobindin-1; AltName: Full=Bone 63 kDa calcium-binding protein; AltName: Full=CALNUC; Flags: Precursor OS=Rattus norvegicus (Rat)
	HSP13_RAT	51763	4	RecName: Full=Heat shock 70 kDa protein 13; AltName: Full=Microsomal stress-70 protein ATPase core; AltName: Full=Stress-70 protein chaperone microsome-associated 60 kDa protein; Flags: Precursor OS=Rattus norvegicus (Rat)
	D3Z8I7_RAT	23366	2	SubName: Full=Protein Gstt3 {ECO:0000313|Ensembl:ENSRNOP00000055038}; SubName: Full=Similar to Glutathione S-transferase
	A1KXK4_RAT	60006	4	SubName: Full=3-beta-hydroxysterol delta 24 reductase {ECO:0000313|EMBL:AAS66628.1} OS=Rattus norvegicus (Rat)
	D3ZBT7_RAT	37535	2	SubName: Full=Protein Fam8a1 {ECO:0000313|Ensembl:ENSRNOP00000031205} OS=Rattus norvegicus (Rat)
	Q2I6B0_RAT	93109	3	RecName: Full=V-type proton ATPase subunit a {ECO:0000256|RuleBase:RU361189} OS=Rattus norvegicus (Rat)
	RAP1B_RAT	20785	6	RecName: Full=Ras-related protein Rap-1b; AltName: Full=GTP-binding protein smg p21B; Flags: Precursor OS=Rattus norvegicus (Rat)
	Q5BK21_RAT	46415	3	SubName: Full=Protein Tm7sf2 {ECO:0000313|Ensembl:ENSRNOP00000028485}; SubName: Full=Transmembrane 7 superfamily member 2 {ECO:0000313|EMBL:AAH91237.1} OS=Rattus norvegicus (Rat)
	HUTH_RAT	72238	3	RecName: Full=Histidine ammonia-lyase; Short=Histidase; EC=4.3.1.3 OS=Rattus norvegicus (Rat)
	Q7TP78_RAT	21952	2	SubName: Full=Aa2-258 {ECO:0000313|EMBL:AAP92568.1}; SubName: Full=Protein Ndufa8 {ECO:0000313|Ensembl:ENSRNOP00000050148} OS=Rattus norvegicus (Rat)
	F1LVC3_RAT	19865	2	SubName: Full=Protein Rab6b {ECO:0000313|Ensembl:ENSRNOP00000012219}; SubName: Full=RAB6B
	Q6AY18_RAT	22384	4	SubName: Full=Protein Sar1a {ECO:0000313|Ensembl:ENSRNOP00000000673}; SubName: Full=SAR1 gene homolog A (S. cerevisiae)
	Q6TUG7_RAT	32123	3	SubName: Full=LRRGT00077 {ECO:0000313|EMBL:AAQ91033.1}; SubName: Full=Uncharacterized protein {ECO:0000313|Ensembl:ENSRNOP00000049614} OS=Rattus norvegicus (Rat)
	W8BZ34_RAT	73284	4	SubName: Full=DDX3Y {ECO:0000313|EMBL:JAC06681.1} OS=Rattus norvegicus (Rat)
	D3ZFF4_RAT	44537	4	SubName: Full=Protein Lclat1 {ECO:0000313|Ensembl:ENSRNOP00000050960}; SubName: Full=Similar to lysocardiolipin acyltransferase isoform 1 (Predicted) {ECO:0000313|EMBL:EDM02860.1} OS=Rattus norvegicus (Rat)
	EMC2_RAT	34847	2	RecName: Full=ER membrane protein complex subunit 2; AltName: Full=Tetratricopeptide repeat protein 35; Short=TPR repeat protein 35 OS=Rattus norvegicus (Rat)
	Q6P9X2_RAT	20613	3	RecName: Full=Signal peptidase complex catalytic subunit SEC11 {ECO:0000256|RuleBase:RU362047}; EC=3.4.21.89 {ECO:0000256|RuleBase:RU362047} OS=Rattus norvegicus (Rat)
	3HAO_RAT	32561	4	RecName: Full=3-hydroxyanthranilate 3
	D3Z9J3_RAT	127681	3	RecName: Full=Phospholipid-transporting ATPase {ECO:0000256|RuleBase:RU362033}; EC=3.6.3.1 {ECO:0000256|RuleBase:RU362033
	Q6TXE9_RAT	166676	2	SubName: Full=LRRGT00050 {ECO:0000313|EMBL:AAQ96263.1}; SubName: Full=Protein Eprs {ECO:0000313|Ensembl:ENSRNOP00000033323} OS=Rattus norvegicus (Rat)
	ERO1A_RAT	53984	3	RecName: Full=ERO1-like protein alpha; Short=ERO1-L; Short=ERO1-L-alpha; EC=1.8.4.-; AltName: Full=Endoplasmic reticulum oxidoreductin-1-like protein; AltName: Full=Global ischemia-induced protein 11; AltName: Full=Oxidoreductin-1-L-alpha; Flags: Pr
	B4F7C7_RAT	21110	2	SubName: Full=Hebp1 protein {ECO:0000313|EMBL:AAI68221.1}; SubName: Full=Heme binding protein 1 (Predicted)
	TM9S4_RAT	74626	3	RecName: Full=Transmembrane 9 superfamily member 4; Flags: Precursor OS=Rattus norvegicus (Rat)
	GABT_RAT	56419	2	RecName: Full=4-aminobutyrate aminotransferase
	PSMD2_RAT	100124	2	RecName: Full=26S proteasome non-ATPase regulatory subunit 2 OS=Rattus norvegicus (Rat)
	D4AE09_RAT	53304	3	SubName: Full=Cytochrome P450
	E9PTA5_RAT	105098	2	SubName: Full=Protein Pign {ECO:0000313|Ensembl:ENSRNOP00000020752} OS=Rattus norvegicus (Rat)
	TMCO1_RAT	21161	2	RecName: Full=Transmembrane and coiled-coil domains protein 1; AltName: Full=Meg-2-like protein OS=Rattus norvegicus (Rat)
	SSRG_RAT	21051	1	RecName: Full=Translocon-associated protein subunit gamma; Short=TRAP-gamma; AltName: Full=Signal sequence receptor subunit gamma; Short=SSR-gamma OS=Rattus norvegicus (Rat)
	GSTT2_RAT	27422	2	RecName: Full=Glutathione S-transferase theta-2; EC=2.5.1.18; AltName: Full=GST 12-12; AltName: Full=GST class-theta-2; AltName: Full=Glutathione S-transferase 12; AltName: Full=Glutathione S-transferase Yrs-Yrs OS=Rattus norvegicus (Rat)
	F1LPS8_RAT	33716	2	SubName: Full=Transcriptional activator protein Pur-alpha {ECO:0000313|Ensembl:ENSRNOP00000025756} OS=Rattus norvegicus (Rat)
	TYB4_RAT	5050	2	RecName: Full=Thymosin beta-4; Short=T beta 4; Contains: RecName: Full=Hematopoietic system regulatory peptide; AltName: Full=Seraspenide OS=Rattus norvegicus (Rat)
	A1KXF7_RAT	46744	2	SubName: Full=TID-1 short isoform {ECO:0000313|EMBL:AAP88584.1} OS=Rattus norvegicus (Rat)
	RL17_RAT	21383	3	RecName: Full=60S ribosomal protein L17; AltName: Full=Amino acid starvation-induced protein; Short=ASI; AltName: Full=L23 OS=Rattus norvegicus (Rat)
	Q6TXG7_RAT	75326	3	RecName: Full=Serine hydroxymethyltransferase {ECO:0000256|RuleBase:RU000585}; EC=2.1.2.1 {ECO:0000256|RuleBase:RU000585} OS=Rattus norvegicus (Rat)
	PAHX_RAT	38563	3	RecName: Full=Phytanoyl-CoA dioxygenase
	B2RYX1_RAT	7457	2	SubName: Full=LOC685322 protein {ECO:0000313|EMBL:AAI66935.1}; SubName: Full=RCG36127
	D3ZEI0_RAT	16639	2	SubName: Full=Protein LOC690096 {ECO:0000313|Ensembl:ENSRNOP00000012255} OS=Rattus norvegicus (Rat)
	ST1B1_RAT	34813	3	RecName: Full=Sulfotransferase family cytosolic 1B member 1; Short=ST1B1; Short=Sulfotransferase 1B1; EC=2.8.2.-; AltName: Full=DOPA/tyrosine sulfotransferase OS=Rattus norvegicus (Rat)
	Q4V8H5_RAT	52522	2	SubName: Full=Aspartyl aminopeptidase {ECO:0000313|EMBL:AAH97388.1}; SubName: Full=Aspartyl aminopeptidase
	RUS1_RAT	50747	2	RecName: Full=RUS1 family protein C16orf58 homolog OS=Rattus norvegicus (Rat)
	ODO1_RAT	116221	3	RecName: Full=2-oxoglutarate dehydrogenase
	B1H250_RAT	33964	2	SubName: Full=Protein RGD1564894 {ECO:0000313|Ensembl:ENSRNOP00000051684}; SubName: Full=RGD1564894 protein {ECO:0000313|EMBL:AAI60862.1} OS=Rattus norvegicus (Rat)
	DEST_RAT	18522	3	RecName: Full=Destrin; AltName: Full=Actin-depolymerizing factor; Short=ADF OS=Rattus norvegicus (Rat)
	F1LXA0_RAT	17167	3	SubName: Full=NADH dehydrogenase (Ubiquinone) 1 alpha subcomplex
	Q4FZU0_RAT	47250	4	SubName: Full=Acid phosphatase 6
	IFM3_RAT	14962	1	RecName: Full=Interferon-induced transmembrane protein 3; AltName: Full=Dispanin subfamily A member 2b; Short=DSPA2b OS=Rattus norvegicus (Rat)
	RB11B_RAT	24473	4	RecName: Full=Ras-related protein Rab-11B; Flags: Precursor OS=Rattus norvegicus (Rat)
	APT_RAT	19533	4	RecName: Full=Adenine phosphoribosyltransferase; Short=APRT; EC=2.4.2.7 OS=Rattus norvegicus (Rat)
	CYC_RAT	11598	2	RecName: Full=Cytochrome c
	K2C6A_RAT	59213	2	RecName: Full=Keratin
	GBB1_RAT	37353	5	RecName: Full=Guanine nucleotide-binding protein G(I)/G(S)/G(T) subunit beta-1; AltName: Full=Transducin beta chain 1 OS=Rattus norvegicus (Rat)
	PA2G4_RAT	43629	3	RecName: Full=Proliferation-associated protein 2G4 OS=Rattus norvegicus (Rat)
	GLYAT_RAT	33877	4	RecName: Full=Glycine N-acyltransferase; EC=2.3.1.13; EC=2.3.1.71; AltName: Full=Acyl-CoA:glycine N-acyltransferase; Short=AAc; AltName: Full=Aralkyl acyl-CoA N-acyltransferase; AltName: Full=Aralkyl acyl-CoA:amino acid N-acyltransferase; AltName: F
	A0A096MJZ2_RAT	49582	3	SubName: Full=Protein Tbl2 {ECO:0000313|Ensembl:ENSRNOP00000068316}; SubName: Full=RCG21429
	ERMP1_RAT	99833	3	RecName: Full=Endoplasmic reticulum metallopeptidase 1 {ECO:0000305}; EC=3.4.-.- {ECO:0000305}; AltName: Full=Felix-ina {ECO:0000303|PubMed:17267443} OS=Rattus norvegicus (Rat)
	Q7TP42_RAT	67888	3	SubName: Full=Ab2-292 {ECO:0000313|EMBL:AAP92608.1}; SubName: Full=Protein Sec62 {ECO:0000313|Ensembl:ENSRNOP00000012240} OS=Rattus norvegicus (Rat)
	TMUB1_RAT	26333	2	RecName: Full=Transmembrane and ubiquitin-like domain-containing protein 1; AltName: Full=Hepatocyte odd protein shuttling protein OS=Rattus norvegicus (Rat)
	GPX1_RAT	22292	3	RecName: Full=Glutathione peroxidase 1; Short=GPx-1; Short=GSHPx-1; EC=1.11.1.9; AltName: Full=Cellular glutathione peroxidase OS=Rattus norvegicus (Rat)
	Q91YB6_RAT	140252	3	SubName: Full=Complement inhibitory factor H {ECO:0000313|EMBL:CAC67513.1} OS=Rattus norvegicus (Rat)
	ACNT2_RAT	45981	4	RecName: Full=Acyl-coenzyme A amino acid N-acyltransferase 2 {ECO:0000250|UniProtKB:Q8BGG9}; EC=2.3.1.- OS=Rattus norvegicus (Rat)
	IDHP_RAT	50935	4	RecName: Full=Isocitrate dehydrogenase [NADP]
	A0A096MJY8_RAT	41262	2	SubName: Full=Protein RGD1562948 {ECO:0000313|Ensembl:ENSRNOP00000068312} OS=Rattus norvegicus (Rat)
	TMED9_RAT	27011	3	RecName: Full=Transmembrane emp24 domain-containing protein 9; AltName: Full=p24 family protein alpha-2; Short=p24alpha2; Flags: Precursor OS=Rattus norvegicus (Rat)
	PSME1_RAT	28559	5	RecName: Full=Proteasome activator complex subunit 1; AltName: Full=11S regulator complex subunit alpha; Short=REG-alpha; AltName: Full=Activator of multicatalytic protease subunit 1; AltName: Full=Proteasome activator 28 subunit alpha; Short=PA28a;
	ERG1_RAT	63984	5	RecName: Full=Squalene monooxygenase; EC=1.14.13.132; AltName: Full=Squalene epoxidase; Short=SE OS=Rattus norvegicus (Rat)
	RHOA_RAT	21768	4	RecName: Full=Transforming protein RhoA; Flags: Precursor OS=Rattus norvegicus (Rat)
	B2RZD1_RAT	9982	2	SubName: Full=Protein Sec61b {ECO:0000313|Ensembl:ENSRNOP00000008329}; SubName: Full=Sec61 beta subunit {ECO:0000313|EMBL:AAI67110.1}; SubName: Full=Sec61 beta subunit (Predicted) {ECO:0000313|EMBL:EDL78204.1} OS=Rattus norvegicus (Rat)
	GRN_RAT	63325	4	RecName: Full=Granulins; Contains: RecName: Full=Acrogranin; AltName: Full=Progranulin; Contains: RecName: Full=Granulin-1; AltName: Full=Granulin G; Contains: RecName: Full=Granulin-2; AltName: Full=Granulin F; Contains: RecName: Full=Granulin-3; A
	AMPN_RAT	109380	2	RecName: Full=Aminopeptidase N; Short=AP-N; Short=rAPN; EC=3.4.11.2; AltName: Full=Alanyl aminopeptidase; AltName: Full=Aminopeptidase M; Short=AP-M; AltName: Full=Kidney Zn peptidase; Short=KZP; AltName: Full=Microsomal aminopeptidase; AltName: CD_
	F1LPG5_RAT	15055	2	SubName: Full=Protein LOC691675 {ECO:0000313|Ensembl:ENSRNOP00000003674} OS=Rattus norvegicus (Rat)
	Q31256_RAT	40969	3	SubName: Full=MHC class I RT1.Au heavy chain {ECO:0000313|EMBL:AAC52552.1}; Flags: Precursor OS=Rattus norvegicus (Rat)
	ACOC_RAT	98065	4	RecName: Full=Cytoplasmic aconitate hydratase; Short=Aconitase; EC=4.2.1.3; AltName: Full=Citrate hydro-lyase; AltName: Full=Iron regulatory protein 1; Short=IRP1; AltName: Full=Iron-responsive element-binding protein 1; Short=IRE-BP 1 OS=Rattus nor
	D3ZCS9_RAT	16000	2	RecName: Full=5-hydroxyisourate hydrolase {ECO:0000256|RuleBase:RU361270}; Short=HIU hydrolase {ECO:0000256|RuleBase:RU361270}; Short=HIUHase {ECO:0000256|RuleBase:RU361270}; EC=3.5.2.17 {ECO:0000256|RuleBase:RU361270} OS=Rattus norvegicus (Rat)
	CBS_RAT	61415	3	RecName: Full=Cystathionine beta-synthase; EC=4.2.1.22; AltName: Full=Beta-thionase; AltName: Full=Hemoprotein H-450; AltName: Full=Serine sulfhydrase OS=Rattus norvegicus (Rat)
	F1M0Q9_RAT	46587	3	SubName: Full=Protein Pm20d1 {ECO:0000313|Ensembl:ENSRNOP00000009838}; Flags: Fragment OS=Rattus norvegicus (Rat)
	CREL2_RAT	38225	3	RecName: Full=Cysteine-rich with EGF-like domain protein 2; Flags: Precursor OS=Rattus norvegicus (Rat)
	COX41_RAT	19502	4	RecName: Full=Cytochrome c oxidase subunit 4 isoform 1
	D3ZUX5_RAT	26418	2	SubName: Full=Coiled-coil-helix-coiled-coil-helix domain containing 3 (Predicted)
	ARL8B_RAT	21525	3	RecName: Full=ADP-ribosylation factor-like protein 8B OS=Rattus norvegicus (Rat)
	F1LNV4_RAT	82703	2	SubName: Full=ATP-binding cassette sub-family B member 7
	CCD51_RAT	45785	2	RecName: Full=Coiled-coil domain-containing protein 51 OS=Rattus norvegicus (Rat)
	B0BNJ4_RAT	27659	2	SubName: Full=Ethylmalonic encephalopathy 1 {ECO:0000313|EMBL:AAI58849.1}; SubName: Full=Ethylmalonic encephalopathy 1 (Predicted) {ECO:0000313|EMBL:EDM08081.1}; SubName: Full=Protein Ethe1 {ECO:0000313|Ensembl:ENSRNOP00000027076} OS=Rattus norvegic
	AOXC_RAT	146657	1	RecName: Full=Aldehyde oxidase 3; EC=1.2.3.1; AltName: Full=Aldehyde oxidase homolog 1; AltName: Full=Azaheterocycle hydroxylase 3; EC=1.17.3.- OS=Rattus norvegicus (Rat)
	B0BNB9_RAT	49064	3	SubName: Full=HtrA serine peptidase 2 {ECO:0000313|EMBL:AAI58761.1}; SubName: Full=Protein Htra2 {ECO:0000313|Ensembl:ENSRNOP00000030076}; SubName: Full=RCG56292
	STS_RAT	62638	5	RecName: Full=Steryl-sulfatase; EC=3.1.6.2; AltName: Full=Arylsulfatase C; Short=ASC; AltName: Full=Steroid sulfatase; AltName: Full=Steryl-sulfate sulfohydrolase; Flags: Precursor OS=Rattus norvegicus (Rat)
	AT1B1_RAT	35179	2	RecName: Full=Sodium/potassium-transporting ATPase subunit beta-1; AltName: Full=Sodium/potassium-dependent ATPase subunit beta-1 OS=Rattus norvegicus (Rat)
	PGAM1_RAT	28814	4	RecName: Full=Phosphoglycerate mutase 1; EC=3.1.3.13; EC=5.4.2.11; EC=5.4.2.4; AltName: Full=BPG-dependent PGAM 1; AltName: Full=Phosphoglycerate mutase isozyme B; Short=PGAM-B OS=Rattus norvegicus (Rat)
	G3V7E4_RAT	45071	1	SubName: Full=Protein Gcat {ECO:0000313|Ensembl:ENSRNOP00000014173} OS=Rattus norvegicus (Rat)
	SYVC_RAT	140280	2	RecName: Full=Valine--tRNA ligase; EC=6.1.1.9; AltName: Full=Valyl-tRNA synthetase; Short=ValRS OS=Rattus norvegicus (Rat)
	QCR8_RAT	9843	3	RecName: Full=Cytochrome b-c1 complex subunit 8; AltName: Full=Complex III subunit 8; AltName: Full=Complex III subunit VIII; AltName: Full=Low molecular mass ubiquinone-binding protein; AltName: Full=Ubiquinol-cytochrome c reductase complex 9.5 kDa
	G3V8J2_RAT	57687	7	SubName: Full=Cytochrome P450
	F1M853_RAT	170887	2	SubName: Full=Protein Rrbp1 {ECO:0000313|Ensembl:ENSRNOP00000052465} OS=Rattus norvegicus (Rat)
	B0BMW4_RAT	45635	2	SubName: Full=GNAS complex locus {ECO:0000313|EMBL:AAI58590.1} OS=Rattus norvegicus (Rat)
	FPPS_RAT	40804	3	RecName: Full=Farnesyl pyrophosphate synthase; Short=FPP synthase; Short=FPS; EC=2.5.1.10; AltName: Full=(2E
	D4A3V2_RAT	15214	3	RecName: Full=NADH dehydrogenase [ubiquinone] 1 alpha subcomplex subunit 6 {ECO:0000256|PIRNR:PIRNR006643} OS=Rattus norvegicus (Rat)
	D3ZF07_RAT	16577	2	SubName: Full=Protein RGD1562402 {ECO:0000313|Ensembl:ENSRNOP00000048422} OS=Rattus norvegicus (Rat)
	CX6A1_RAT	12293	3	RecName: Full=Cytochrome c oxidase subunit 6A1
	PCY2_RAT	45192	2	RecName: Full=Ethanolamine-phosphate cytidylyltransferase; EC=2.7.7.14; AltName: Full=CTP:phosphoethanolamine cytidylyltransferase; AltName: Full=Phosphorylethanolamine transferase OS=Rattus norvegicus (Rat)
	BASI_RAT	42409	2	RecName: Full=Basigin; AltName: Full=Glycoprotein CE9; AltName: Full=OX-47 antigen; AltName: CD_antigen=CD147; Flags: Precursor OS=Rattus norvegicus (Rat)
	M0R7G4_RAT	22567	2	SubName: Full=Protein Apoo {ECO:0000313|Ensembl:ENSRNOP00000065393} OS=Rattus norvegicus (Rat)
	PHS_RAT	11992	4	RecName: Full=Pterin-4-alpha-carbinolamine dehydratase; Short=PHS; EC=4.2.1.96; AltName: Full=4-alpha-hydroxy-tetrahydropterin dehydratase; AltName: Full=Dimerization cofactor of hepatocyte nuclear factor 1-alpha; Short=DCoH; Short=Dimerization cofa
	ATP5L_RAT	11426	2	RecName: Full=ATP synthase subunit g
	D3ZEG8_RAT	29854	2	SubName: Full=Protein RGD1309188 {ECO:0000313|Ensembl:ENSRNOP00000012270}; SubName: Full=Putative uncharacterized protein RGD1309188_predicted {ECO:0000313|EMBL:EDL78280.1} OS=Rattus norvegicus (Rat)
	KACA_RAT	11725	3	RecName: Full=Ig kappa chain C region
	PBLD_RAT	31667	2	RecName: Full=Phenazine biosynthesis-like domain-containing protein; EC=5.1.-.- OS=Rattus norvegicus (Rat)
	ACDSB_RAT	47793	4	RecName: Full=Short/branched chain specific acyl-CoA dehydrogenase
	F1M201_RAT	35199	2	SubName: Full=Dehydrogenase/reductase SDR family member 7B {ECO:0000313|Ensembl:ENSRNOP00000063744}; Flags: Fragment OS=Rattus norvegicus (Rat)
	Q641Z9_RAT	18191	3	SubName: Full=Protein Sdhc {ECO:0000313|Ensembl:ENSRNOP00000004228}; SubName: Full=Succinate dehydrogenase complex
	BGLR_RAT	74746	2	RecName: Full=Beta-glucuronidase; EC=3.2.1.31; Flags: Precursor OS=Rattus norvegicus (Rat)
	G3V784_RAT	53885	2	SubName: Full=ADP-dependent glucokinase
	MCCA_RAT	79279	2	RecName: Full=Methylcrotonoyl-CoA carboxylase subunit alpha
	ARL1_RAT	20398	2	RecName: Full=ADP-ribosylation factor-like protein 1 OS=Rattus norvegicus (Rat)
	Q31267_RAT	41803	3	SubName: Full=MHC class I RT1.E {ECO:0000313|EMBL:AAC42072.1}; SubName: Full=MHC class I antigen {ECO:0000313|EMBL:CAC36353.1}; Flags: Precursor OS=Rattus norvegicus (Rat)
	F1M9A7_RAT	78155	2	RecName: Full=Acyl-coenzyme A oxidase {ECO:0000256|PIRNR:PIRNR000168} OS=Rattus norvegicus (Rat)
	SYAC_RAT	106723	3	RecName: Full=Alanine--tRNA ligase
	GTR2_RAT	57049	3	RecName: Full=Solute carrier family 2
	IF2G_RAT	51047	2	RecName: Full=Eukaryotic translation initiation factor 2 subunit 3; AltName: Full=Eukaryotic translation initiation factor 2 subunit gamma; Short=eIF-2-gamma; AltName: Full=PP42 OS=Rattus norvegicus (Rat)
	RAB9A_RAT	22881	3	RecName: Full=Ras-related protein Rab-9A OS=Rattus norvegicus (Rat)
	AMBP_RAT	38826	2	RecName: Full=Protein AMBP; Contains: RecName: Full=Alpha-1-microglobulin; Contains: RecName: Full=Inter-alpha-trypsin inhibitor light chain; Short=ITI-LC; AltName: Full=Bikunin; AltName: Full=HI-30; Contains: RecName: Full=Trypstatin; Flags: Precur
	B0BN51_RAT	23640	2	RecName: Full=Small nuclear ribonucleoprotein-associated protein {ECO:0000256|PIRNR:PIRNR037187} OS=Rattus norvegicus (Rat)
	DHCR7_RAT	54119	3	RecName: Full=7-dehydrocholesterol reductase; Short=7-DHC reductase; EC=1.3.1.21; AltName: Full=Sterol Delta(7)-reductase OS=Rattus norvegicus (Rat)
	ADHX_RAT	39550	2	RecName: Full=Alcohol dehydrogenase class-3; EC=1.1.1.1; AltName: Full=Alcohol dehydrogenase 2; AltName: Full=Alcohol dehydrogenase 5; AltName: Full=Alcohol dehydrogenase B2; Short=ADH-B2; AltName: Full=Alcohol dehydrogenase class-III; AltName: Full
	B0BMZ1_RAT	13177	1	SubName: Full=Protein RGD1305587 {ECO:0000313|Ensembl:ENSRNOP00000000662}; SubName: Full=RGD1305587 protein {ECO:0000313|EMBL:AAI58619.1}; SubName: Full=Similar to RIKEN cDNA 2010107G23 (Predicted)
	E9PSZ7_RAT	56076	3	SubName: Full=Protein Cyp2t1 {ECO:0000313|Ensembl:ENSRNOP00000061482} OS=Rattus norvegicus (Rat)
	ERF1_RAT	49000	3	RecName: Full=Eukaryotic peptide chain release factor subunit 1; Short=Eukaryotic release factor 1; Short=eRF1 OS=Rattus norvegicus (Rat)
	D3ZFK5_RAT	11743	1	SubName: Full=Protein Spcs1 {ECO:0000313|Ensembl:ENSRNOP00000024447} OS=Rattus norvegicus (Rat)
	Q5RJN0_RAT	23929	2	SubName: Full=NADH dehydrogenase (Ubiquinone) Fe-S protein 7 {ECO:0000313|EMBL:AAH86574.1}; SubName: Full=NADH dehydrogenase (Ubiquinone) Fe-S protein 7
	K1C19_RAT	44609	3	RecName: Full=Keratin
	ARP3_RAT	47327	3	RecName: Full=Actin-related protein 3; AltName: Full=Actin-like protein 3 OS=Rattus norvegicus (Rat)
	TIM9_RAT	10369	2	RecName: Full=Mitochondrial import inner membrane translocase subunit Tim9 OS=Rattus norvegicus (Rat)
	G3V6W2_RAT	45343	3	SubName: Full=Prolactin regulatory element-binding protein {ECO:0000313|Ensembl:ENSRNOP00000009566}; SubName: Full=RCG62389
	TCPD_RAT	58063	3	RecName: Full=T-complex protein 1 subunit delta; Short=TCP-1-delta; AltName: Full=CCT-delta OS=Rattus norvegicus (Rat)
	ATPK_RAT	10446	2	RecName: Full=ATP synthase subunit f
	D4A7X3_RAT	16950	2	SubName: Full=Protein Gm5218 {ECO:0000313|Ensembl:ENSRNOP00000009204} OS=Rattus norvegicus (Rat)
	SPTN1_RAT	284462	2	RecName: Full=Spectrin alpha chain
	K2C1_RAT	64791	2	RecName: Full=Keratin
	ABHGA_RAT	62998	2	RecName: Full=Abhydrolase domain-containing protein 16A; EC=3.-.-.-; AltName: Full=HLA-B-associated transcript 5 OS=Rattus norvegicus (Rat)
	M0RDI5_RAT	39733	2	SubName: Full=Protein Mcu {ECO:0000313|Ensembl:ENSRNOP00000067686}; SubName: Full=Similar to CG18769-PB
	F1LM47_RAT	50274	3	RecName: Full=Succinyl-CoA ligase subunit beta {ECO:0000256|RuleBase:RU361258}; EC=6.2.1.- {ECO:0000256|RuleBase:RU361258} OS=Rattus norvegicus (Rat)
	D4AAE9_RAT	15283	2	SubName: Full=Protein Cisd2 {ECO:0000313|Ensembl:ENSRNOP00000066613}; SubName: Full=Similar to RIKEN cDNA 1500009M05 (Predicted) {ECO:0000313|EMBL:EDL82257.1} OS=Rattus norvegicus (Rat)
	D3ZLT1_RAT	16557	3	SubName: Full=NADH dehydrogenase (Ubiquinone) 1 beta subcomplex
	MDHC_RAT	36460	3	RecName: Full=Malate dehydrogenase
	A9UMW1_RAT	25493	3	RecName: Full=Glutathione S-transferase {ECO:0000256|RuleBase:RU004454}; EC=2.5.1.18 {ECO:0000256|RuleBase:RU004454} OS=Rattus norvegicus (Rat)
	MVP_RAT	95739	5	RecName: Full=Major vault protein; Short=MVP OS=Rattus norvegicus (Rat)
	VKGC_RAT	87423	3	RecName: Full=Vitamin K-dependent gamma-carboxylase; EC=4.1.1.90; AltName: Full=Gamma-glutamyl carboxylase; AltName: Full=Peptidyl-glutamate 4-carboxylase; AltName: Full=Vitamin K gamma glutamyl carboxylase OS=Rattus norvegicus (Rat)
	AGT2_RAT	57164	2	RecName: Full=Alanine--glyoxylate aminotransferase 2
	D4AB01_RAT	17369	2	SubName: Full=Histidine triad nucleotide binding protein 2 (Predicted)
	TFR2_RAT	88273	2	RecName: Full=Transferrin receptor protein 2; Short=TfR2 OS=Rattus norvegicus (Rat)
	M0R907_RAT	13907	2	SubName: Full=Protein Snrpd3 {ECO:0000313|Ensembl:ENSRNOP00000065967}; SubName: Full=RCG60635
	Q99ND5_RAT	35339	3	RecName: Full=Sulfotransferase {ECO:0000256|RuleBase:RU361155}; EC=2.8.2.- {ECO:0000256|RuleBase:RU361155} OS=Rattus norvegicus (Rat)
	GDIB_RAT	50505	2	RecName: Full=Rab GDP dissociation inhibitor beta; Short=Rab GDI beta; AltName: Full=GDI-3; AltName: Full=Guanosine diphosphate dissociation inhibitor 2; Short=GDI-2 OS=Rattus norvegicus (Rat)
	DCAKD_RAT	27335	1	RecName: Full=Dephospho-CoA kinase domain-containing protein OS=Rattus norvegicus (Rat)
	D3ZLG3_RAT	23688	2	SubName: Full=Uncharacterized protein {ECO:0000313|Ensembl:ENSRNOP00000041486} OS=Rattus norvegicus (Rat)
	IF5A1_RAT	16821	2	RecName: Full=Eukaryotic translation initiation factor 5A-1; Short=eIF-5A-1; Short=eIF-5A1; AltName: Full=Eukaryotic initiation factor 5A isoform 1; Short=eIF-5A; AltName: Full=eIF-4D OS=Rattus norvegicus (Rat)
	E0A3N4_RAT	48010	2	SubName: Full=Serpina3n-like protein {ECO:0000313|EMBL:ADK91429.1} OS=Rattus norvegicus (Rat)
	ACSL4_RAT	74279	2	RecName: Full=Long-chain-fatty-acid--CoA ligase 4; EC=6.2.1.3; AltName: Full=Long-chain acyl-CoA synthetase 4; Short=LACS 4 OS=Rattus norvegicus (Rat)
	MRP6_RAT	164890	2	RecName: Full=Multidrug resistance-associated protein 6; AltName: Full=ATP-binding cassette sub-family C member 6; AltName: Full=MRP-like protein 1; Short=MLP-1 OS=Rattus norvegicus (Rat)
	B2RZB2_RAT	25589	3	SubName: Full=Uncharacterized protein {ECO:0000313|EMBL:AAI67090.1} OS=Rattus norvegicus (Rat)
	D3ZN79_RAT	14489	3	SubName: Full=Protein LOC686074 {ECO:0000313|Ensembl:ENSRNOP00000046281} OS=Rattus norvegicus (Rat)
	FIS1_RAT	16984	2	RecName: Full=Mitochondrial fission 1 protein; AltName: Full=FIS1 homolog; Short=rFis1; AltName: Full=Tetratricopeptide repeat protein 11; Short=TPR repeat protein 11 OS=Rattus norvegicus (Rat)
	GSH0_RAT	30529	2	RecName: Full=Glutamate--cysteine ligase regulatory subunit; AltName: Full=GCS light chain; AltName: Full=Gamma-ECS regulatory subunit; AltName: Full=Gamma-glutamylcysteine synthetase regulatory subunit; AltName: Full=Glutamate--cysteine ligase modi
	Q5EB55_RAT	61793	1	SubName: Full=Gbe1 protein {ECO:0000313|EMBL:AAH90037.1}; Flags: Fragment OS=Rattus norvegicus (Rat)
	GNAI3_RAT	40496	2	RecName: Full=Guanine nucleotide-binding protein G(k) subunit alpha; AltName: Full=G(i) alpha-3 OS=Rattus norvegicus (Rat)
	B2RYW3_RAT	21878	2	SubName: Full=NADH dehydrogenase (Ubiquinone) 1 beta subcomplex
	F1LZJ4_RAT	30571	2	RecName: Full=Hydroxypyruvate isomerase {ECO:0000256|PIRNR:PIRNR006241}; EC=5.3.1.22 {ECO:0000256|PIRNR:PIRNR006241} OS=Rattus norvegicus (Rat)
	RDH10_RAT	38036	2	RecName: Full=Retinol dehydrogenase 10; EC=1.1.1.300 OS=Rattus norvegicus (Rat)
	A0A023IM54_RAT	49994	2	SubName: Full=TAP binding protein {ECO:0000313|EMBL:AGV39018.1} OS=Rattus norvegicus (Rat)
	Q5RKK1_RAT	75457	2	RecName: Full=Sulfate anion transporter 1 {ECO:0000256|RuleBase:RU362052}; AltName: Full=Solute carrier family 26 member 1 {ECO:0000256|RuleBase:RU362052} OS=Rattus norvegicus (Rat)
	D3Z9G3_RAT	18572	2	SubName: Full=Protein LOC100361103 {ECO:0000313|Ensembl:ENSRNOP00000039786} OS=Rattus norvegicus (Rat)
	B1WBY5_RAT	63166	2	SubName: Full=DnaJ (Hsp40) homolog
	CTNB1_RAT	85400	2	RecName: Full=Catenin beta-1; AltName: Full=Beta-catenin OS=Rattus norvegicus (Rat)
	NLRX1_RAT	107522	3	RecName: Full=NLR family member X1; Flags: Precursor OS=Rattus norvegicus (Rat)
	D3Z9U2_RAT	120643	2	SubName: Full=CD163 antigen (Predicted) {ECO:0000313|EMBL:EDM01961.1}; SubName: Full=Protein Cd163 {ECO:0000313|Ensembl:ENSRNOP00000058828} OS=Rattus norvegicus (Rat)
	CP3A9_RAT	57774	3	RecName: Full=Cytochrome P450 3A9; EC=1.14.14.1; AltName: Full=3AH15; AltName: Full=CYPIIIA9; AltName: Full=Cytochrome P450 olfactive 3; AltName: Full=Cytochrome P450-OLF3 OS=Rattus norvegicus (Rat)
	F1M0L7_RAT	36263	4	RecName: Full=Annexin {ECO:0000256|RuleBase:RU003540}; Flags: Fragment OS=Rattus norvegicus (Rat)
	PXMP2_RAT	22562	3	RecName: Full=Peroxisomal membrane protein 2; AltName: Full=22 kDa peroxisomal membrane protein OS=Rattus norvegicus (Rat)
	AMACR_RAT	41801	4	RecName: Full=Alpha-methylacyl-CoA racemase; EC=5.1.99.4; AltName: Full=2-arylpropionyl-CoA epimerase; AltName: Full=2-methylacyl-CoA racemase OS=Rattus norvegicus (Rat)
	D3ZIN5_RAT	150188	2	SubName: Full=Protein Vwa8 {ECO:0000313|Ensembl:ENSRNOP00000013780}; Flags: Fragment OS=Rattus norvegicus (Rat)
	M0R3V4_RAT	17840	2	SubName: Full=Protein LOC501282 {ECO:0000313|Ensembl:ENSRNOP00000064027} OS=Rattus norvegicus (Rat)
	PRS6B_RAT	47379	2	RecName: Full=26S protease regulatory subunit 6B; AltName: Full=26S proteasome AAA-ATPase subunit RPT3; AltName: Full=Proteasome 26S subunit ATPase 4; Short=S6 ATPase; AltName: Full=Tat-binding protein 7; Short=TBP-7 OS=Rattus norvegicus (Rat)
	Q6MGB4_RAT	49469	2	SubName: Full=H2-K region expressed gene 4
	M0RDK9_RAT	33281	2	SubName: Full=Protein Acad8 {ECO:0000313|Ensembl:ENSRNOP00000067711}; Flags: Fragment OS=Rattus norvegicus (Rat)
	COPD_RAT	57163	2	RecName: Full=Coatomer subunit delta; AltName: Full=Archain; AltName: Full=Delta-coat protein; Short=Delta-COP OS=Rattus norvegicus (Rat)
	B2MG_RAT	13711	2	RecName: Full=Beta-2-microglobulin; Flags: Precursor OS=Rattus norvegicus (Rat)
	FMO4_RAT	63619	2	RecName: Full=Dimethylaniline monooxygenase [N-oxide-forming] 4; EC=1.14.13.8; AltName: Full=Dimethylaniline oxidase 4; AltName: Full=Hepatic flavin-containing monooxygenase 4; Short=FMO 4 OS=Rattus norvegicus (Rat)
	HRG_RAT	59012	2	RecName: Full=Histidine-rich glycoprotein; AltName: Full=Histidine-proline-rich glycoprotein; Short=HPRG; AltName: Full=Histidine-rich glycoprotein 1; Short=HRG1; Flags: Precursor OS=Rattus norvegicus (Rat)
	D3ZNH4_RAT	15483	3	RecName: Full=Histone H2B {ECO:0000256|RuleBase:RU000451} OS=Rattus norvegicus (Rat)
	CREL1_RAT	45666	2	RecName: Full=Cysteine-rich with EGF-like domain protein 1; Flags: Precursor OS=Rattus norvegicus (Rat)
	D3ZGU2_RAT	54201	3	SubName: Full=Protein Acss3 {ECO:0000313|Ensembl:ENSRNOP00000062459}; SubName: Full=Putative uncharacterized protein RGD1307051_predicted {ECO:0000313|EMBL:EDM16776.1} OS=Rattus norvegicus (Rat)
	CLCB_RAT	25102	2	RecName: Full=Clathrin light chain B; Short=Lcb OS=Rattus norvegicus (Rat)
	IR3IP_RAT	8993	2	RecName: Full=Immediate early response 3-interacting protein 1 OS=Rattus norvegicus (Rat)
	HEM6_RAT	49247	3	RecName: Full=Oxygen-dependent coproporphyrinogen-III oxidase
	GLCNE_RAT	79176	2	RecName: Full=Bifunctional UDP-N-acetylglucosamine 2-epimerase/N-acetylmannosamine kinase; AltName: Full=UDP-GlcNAc-2-epimerase/ManAc kinase; Includes: RecName: Full=UDP-N-acetylglucosamine 2-epimerase (hydrolyzing); EC=3.2.1.183; AltName: Full=UDP-
	CX6C2_RAT	8449	2	RecName: Full=Cytochrome c oxidase subunit 6C-2; AltName: Full=Cytochrome c oxidase polypeptide VIc-2 OS=Rattus norvegicus (Rat)
	TM9S2_RAT	75536	2	RecName: Full=Transmembrane 9 superfamily member 2; Flags: Precursor OS=Rattus norvegicus (Rat)
	SPRE_RAT	28110	2	RecName: Full=Sepiapterin reductase; Short=SPR; EC=1.1.1.153 OS=Rattus norvegicus (Rat)
	NINJ1_RAT	16529	2	RecName: Full=Ninjurin-1; AltName: Full=Nerve injury-induced protein 1 OS=Rattus norvegicus (Rat)
	NXPE4_RAT	61576	2	RecName: Full=NXPE family member 4; AltName: Full=Protein FAM55D; Flags: Precursor OS=Rattus norvegicus (Rat)
	RAN_RAT	24408	2	RecName: Full=GTP-binding nuclear protein Ran; AltName: Full=GTPase Ran; AltName: Full=Ras-like protein TC4; AltName: Full=Ras-related nuclear protein OS=Rattus norvegicus (Rat)
	D3ZBN4_RAT	15795	2	SubName: Full=Protein RGD1310769 {ECO:0000313|Ensembl:ENSRNOP00000012327}; SubName: Full=Similar to HSPC288 (Predicted)
	D4AC23_RAT	59620	2	SubName: Full=Protein Cct7 {ECO:0000313|Ensembl:ENSRNOP00000021030}; SubName: Full=RCG55994
	D3ZZ21_RAT	15628	3	SubName: Full=NADH dehydrogenase (Ubiquinone) 1 beta subcomplex
	F1LQW3_RAT	65654	2	SubName: Full=Protein Sfpq {ECO:0000313|Ensembl:ENSRNOP00000018049}; Flags: Fragment OS=Rattus norvegicus (Rat)
	G8JLS2_RAT	29579	2	SubName: Full=3-oxo-5-alpha-steroid 4-dehydrogenase 1 {ECO:0000313|Ensembl:ENSRNOP00000023659}; Flags: Fragment OS=Rattus norvegicus (Rat)
	B5DFC3_RAT	86106	2	SubName: Full=Protein Sec23a {ECO:0000313|Ensembl:ENSRNOP00000006369}; SubName: Full=SEC23A (S. cerevisiae) (Predicted) {ECO:0000313|EMBL:EDM03463.1}; SubName: Full=Sec23 homolog A (S. cerevisiae) {ECO:0000313|EMBL:AAI69006.1} OS=Rattus norvegicus (
	ABHEB_RAT	22604	2	RecName: Full=Alpha/beta hydrolase domain-containing protein 14B; Short=Abhydrolase domain-containing protein 14B; EC=3.-.-.- OS=Rattus norvegicus (Rat)
	G3V9J8_RAT	93668	2	SubName: Full=Glycerol-3-phosphate acyltransferase 1
	PSA6_RAT	27382	2	RecName: Full=Proteasome subunit alpha type-6; EC=3.4.25.1; AltName: Full=Macropain iota chain; AltName: Full=Multicatalytic endopeptidase complex iota chain; AltName: Full=Proteasome iota chain OS=Rattus norvegicus (Rat)
	OAT_RAT	48302	2	RecName: Full=Ornithine aminotransferase
	LPPRC_RAT	156554	3	RecName: Full=Leucine-rich PPR motif-containing protein
	ARC1B_RAT	41030	2	RecName: Full=Actin-related protein 2/3 complex subunit 1B; AltName: Full=Arp2/3 complex 41 kDa subunit; AltName: Full=p41-ARC OS=Rattus norvegicus (Rat)
	G3V6I9_RAT	17248	2	SubName: Full=60S ribosomal protein L26 {ECO:0000313|Ensembl:ENSRNOP00000005588}; SubName: Full=RCG33968
	D3ZH98_RAT	68814	2	SubName: Full=Uncharacterized protein {ECO:0000313|Ensembl:ENSRNOP00000041523} OS=Rattus norvegicus (Rat)
	M0RBL9_RAT	78947	2	SubName: Full=Protein Vwa8 {ECO:0000313|Ensembl:ENSRNOP00000066959}; Flags: Fragment OS=Rattus norvegicus (Rat)
	PEX14_RAT	40912	2	RecName: Full=Peroxisomal membrane protein PEX14; AltName: Full=PTS1 receptor-docking protein; AltName: Full=Peroxin-14; AltName: Full=Peroxisomal membrane anchor protein PEX14 OS=Rattus norvegicus (Rat)
	B8YDD1_RAT	17054	1	SubName: Full=HS1 binding protein variant IX {ECO:0000313|EMBL:ACL37475.1}; SubName: Full=HS1 binding protein
	S22A7_RAT	58616	2	RecName: Full=Solute carrier family 22 member 7; AltName: Full=Novel liver transporter; AltName: Full=Organic anion transporter 2 OS=Rattus norvegicus (Rat)
	Q8K3R0_RAT	61762	3	RecName: Full=Carboxylic ester hydrolase; EC=3.1.1.- OS=Rattus norvegicus (Rat)
	Q5U1Z9_RAT	29699	3	SubName: Full=Metaxin 2 {ECO:0000313|EMBL:AAH86360.1}; SubName: Full=Protein Mtx2 {ECO:0000313|Ensembl:ENSRNOP00000002134} OS=Rattus norvegicus (Rat)
	AL1A7_RAT	54525	2	RecName: Full=Aldehyde dehydrogenase
	Q7TP05_RAT	123960	2	SubName: Full=Da1-24 {ECO:0000313|EMBL:AAP92654.1}; SubName: Full=Protein C2 {ECO:0000313|Ensembl:ENSRNOP00000059051} OS=Rattus norvegicus (Rat)
	TTPA_RAT	31826	2	RecName: Full=Alpha-tocopherol transfer protein; Short=Alpha-TTP OS=Rattus norvegicus (Rat)
	CATD_RAT	44652	1	RecName: Full=Cathepsin D; EC=3.4.23.5; Contains: RecName: Full=Cathepsin D 12 kDa light chain; Contains: RecName: Full=Cathepsin D 9 kDa light chain; Contains: RecName: Full=Cathepsin D 34 kDa heavy chain; Contains: RecName: Full=Cathepsin D 30 kDa
	TMM11_RAT	21328	2	RecName: Full=Transmembrane protein 11
	F1LNY0_RAT	24475	2	SubName: Full=Uncharacterized protein {ECO:0000313|Ensembl:ENSRNOP00000062740} OS=Rattus norvegicus (Rat)
	Q5I0K1_RAT	43863	2	SubName: Full=Pipecolic acid oxidase {ECO:0000313|EMBL:AAH88249.1}; SubName: Full=Protein Pipox {ECO:0000313|Ensembl:ENSRNOP00000012154} OS=Rattus norvegicus (Rat)
	RL39_RAT	6403	1	RecName: Full=60S ribosomal protein L39 OS=Rattus norvegicus (Rat)
	GSLG1_RAT	133469	2	RecName: Full=Golgi apparatus protein 1; AltName: Full=E-selectin ligand 1; Short=ESL-1; AltName: Full=Golgi sialoglycoprotein MG-160; Flags: Precursor OS=Rattus norvegicus (Rat)
	G3V9X8_RAT	37915	2	SubName: Full=Magnesium transporter protein 1 {ECO:0000313|Ensembl:ENSRNOP00000062502} OS=Rattus norvegicus (Rat)
	D3ZF97_RAT	54631	2	SubName: Full=Protein Erlec1 {ECO:0000313|Ensembl:ENSRNOP00000043115}; SubName: Full=Putative uncharacterized protein RGD1306508_predicted {ECO:0000313|EMBL:EDL98051.1} OS=Rattus norvegicus (Rat)
	CP2J3_RAT	57932	2	RecName: Full=Cytochrome P450 2J3; EC=1.14.14.1; AltName: Full=CYPIIJ3 OS=Rattus norvegicus (Rat)
	5NTD_RAT	63928	1	RecName: Full=5'-nucleotidase; Short=5'-NT; EC=3.1.3.5; AltName: Full=Ecto-5'-nucleotidase; AltName: CD_antigen=CD73; Flags: Precursor OS=Rattus norvegicus (Rat)
	Q6IMY8_RAT	87678	2	SubName: Full=Heterogeneous nuclear ribonucleoprotein U {ECO:0000313|EMBL:AAH72529.1}; SubName: Full=Protein Hnrnpu {ECO:0000313|Ensembl:ENSRNOP00000046783}; SubName: Full=RCG20317
	A2VD07_RAT	60668	2	SubName: Full=Cytochrome P450 4F5 {ECO:0000313|EMBL:AAI29086.1
	G3V7J5_RAT	62369	2	RecName: Full=Carboxylic ester hydrolase {ECO:0000256|RuleBase:RU361235}; EC=3.1.1.- {ECO:0000256|RuleBase:RU361235} OS=Rattus norvegicus (Rat)
	HINT1_RAT	13768	2	RecName: Full=Histidine triad nucleotide-binding protein 1; EC=3.-.-.-; AltName: Full=17 kDa inhibitor of protein kinase C; AltName: Full=Adenosine 5'-monophosphoramidase; AltName: Full=Protein kinase C inhibitor 1; AltName: Full=Protein kinase C-in
	ACADV_RAT	70705	4	RecName: Full=Very long-chain specific acyl-CoA dehydrogenase
	T23O_RAT	47826	2	RecName: Full=Tryptophan 2
	B2GV15_RAT	53240	2	SubName: Full=Dihydrolipoamide branched chain transacylase E2 {ECO:0000313|EMBL:AAI66487.1}; SubName: Full=Dihydrolipoamide branched chain transacylase E2
	ABHD6_RAT	38287	2	RecName: Full=Monoacylglycerol lipase ABHD6 {ECO:0000305}; EC=3.1.1.23 {ECO:0000250|UniProtKB:Q9BV23}; AltName: Full=2-arachidonoylglycerol hydrolase {ECO:0000250|UniProtKB:Q8R2Y0}; AltName: Full=Abhydrolase domain-containing protein 6 {ECO:0000312|
	LONM_RAT	105726	2	RecName: Full=Lon protease homolog
	F1LPQ6_RAT	38674	2	SubName: Full=Uncharacterized protein {ECO:0000313|Ensembl:ENSRNOP00000039536}; Flags: Fragment OS=Rattus norvegicus (Rat)
	LAMP1_RAT	43941	2	RecName: Full=Lysosome-associated membrane glycoprotein 1; Short=LAMP-1; Short=Lysosome-associated membrane protein 1; AltName: Full=120 kDa lysosomal membrane glycoprotein; Short=LGP-120; AltName: Full=CD107 antigen-like family member A; AltName: C
	XYLB_RAT	57933	2	RecName: Full=Xylulose kinase; Short=Xylulokinase; EC=2.7.1.17 OS=Rattus norvegicus (Rat)
	APOA1_RAT	30043	2	RecName: Full=Apolipoprotein A-I; Short=Apo-AI; Short=ApoA-I; AltName: Full=Apolipoprotein A1; Contains: RecName: Full=Proapolipoprotein A-I; Short=ProapoA-I; Flags: Precursor OS=Rattus norvegicus (Rat)
	G6PC_RAT	40529	3	RecName: Full=Glucose-6-phosphatase; Short=G-6-Pase; Short=G6Pase; EC=3.1.3.9 OS=Rattus norvegicus (Rat)
	F261_RAT	54729	3	RecName: Full=6-phosphofructo-2-kinase/fructose-2
	FCGRN_RAT	40143	2	RecName: Full=IgG receptor FcRn large subunit p51; Short=FcRn; AltName: Full=IgG Fc fragment receptor transporter alpha chain; AltName: Full=Neonatal Fc receptor; Flags: Precursor OS=Rattus norvegicus (Rat)
	ENPP3_RAT	99008	2	RecName: Full=Ectonucleotide pyrophosphatase/phosphodiesterase family member 3; Short=E-NPP 3; AltName: Full=B10; AltName: Full=Phosphodiesterase I beta; Short=PD-Ibeta; AltName: Full=Phosphodiesterase I/nucleotide pyrophosphatase 3; AltName: Full=R
[truncated: 4,151 more rows]
